# Supplementary material for: Transcriptome Analysis Revealed the Potential Molecular Mechanism of Anthocyanidins’ Improved Salt Tolerance in Maize Seedlings
Source: Plants (Basel). 2023 Jul 27;12(15):2793. doi: 10.3390/plants12152793 (PMC10421157; doi:10.3390/plants12152793)
Supplement: Supplementary file 1 [file plants-12-02793-s001.zip › 20230719-Supplementary table-1-10.xlsx]

## Sheet: Table S1
Table S1 common DEGs response to salt stress in RILpur-W22 and RILbro-W22 seedlings
geneID	up or down
Zm00001d027048	down
ZemaCr113	down
Zm00001d025872	down
Zm00001d031794	down
Zm00001d020495	down
Zm00001d038164	down
ENSRNA049479884	down
Zm00001d023159	down
ENSRNA049478607	down
Zm00001d001139	down
Zm00001d033987	down
ENSRNA049478576	down
Zm00001d007027	down
Zm00001d031736	down
Zm00001d053933	down
Zm00001d040837	down
ZemaCr114	down
Zm00001d021781	down
ENSRNA049478131	down
Zm00001d054074	down
Zm00001d051801	down
Zm00001d017031	down
Zm00001d048720	down
Zm00001d012025	down
ENSRNA049478138	down
ENSRNA049478600	down
Zm00001d022701	down
ENSRNA049462250	down
Zm00001d035195	down
Zm00001d016588	down
Zm00001d010885	down
ENSRNA049479084	down
Zm00001d026094	down
Zm00001d003717	down
ENSRNA049462318	down
Zm00001d014840	down
ENSRNA049479590	down
Zm00001d043393	down
Zm00001d047124	down
Zm00001d000763	down
Zm00001d011003	down
ENSRNA049479871	down
Zm00001d017065	down
Zm00001d007349	down
Zm00001d052194	down
ENSRNA049478494	down
ENSRNA049479027	down
ENSRNA049478180	down
Zm00001d026859	down
Zm00001d029778	down
Zm00001d048719	down
ZemaCr119	down
ZeamMr002	down
Zm00001d002970	down
Zm00001d031300	down
Zm00001d017287	down
Zm00001d037631	down
Zm00001d040502	down
Zm00001d042376	down
ENSRNA049478756	down
ENSRNA049476438	down
Zm00001d049625	down
Zm00001d015224	down
Zm00001d039826	down
Zm00001d033471	down
ENSRNA049462348	down
Zm00001d048307	down
Zm00001d002564	down
ENSRNA049478113	down
Zm00001d025614	down
Zm00001d017622	down
Zm00001d031778	down
Zm00001d047548	down
Zm00001d008073	down
Zm00001d019605	down
Zm00001d021770	down
Zm00001d009797	down
Zm00001d032105	down
ZemaCr120	down
Zm00001d044969	down
Zm00001d015487	down
Zm00001d031673	down
Zm00001d032291	down
Zm00001d051653	down
Zm00001d034673	down
Zm00001d054093	down
Zm00001d036866	down
Zm00001d003912	down
ENSRNA049478183	down
ENSRNA049478136	down
Zm00001d031303	down
Zm00001d037632	down
Zm00001d000824	down
Zm00001d003624	down
Zm00001d006882	down
Zm00001d041553	down
Zm00001d000482	down
ZeamMp073	down
Zm00001d015697	down
Zm00001d048294	down
Zm00001d012321	down
Zm00001d025707	down
Zm00001d003993	down
Zm00001d041514	down
Zm00001d011132	down
Zm00001d043479	down
Zm00001d048311	down
Zm00001d038288	down
Zm00001d015217	down
Zm00001d052738	down
Zm00001d051216	down
ENSRNA049478590	down
ENSRNA049478140	down
ZeamMr004	down
ZeamMr001	down
Zm00001d038403	down
Zm00001d031127	down
Zm00001d007470	down
Zm00001d030915	down
Zm00001d005984	down
Zm00001d036045	down
Zm00001d012403	down
Zm00001d010061	down
Zm00001d013907	down
Zm00001d021772	down
Zm00001d041390	down
Zm00001d011020	down
Zm00001d016401	down
Zm00001d038996	down
Zm00001d005892	down
Zm00001d045459	down
Zm00001d021934	down
Zm00001d034506	down
Zm00001d022868	down
Zm00001d037988	down
ENSRNA049478530	down
Zm00001d001924	down
Zm00001d023387	down
Zm00001d047159	down
Zm00001d053364	down
Zm00001d016811	down
Zm00001d043104	down
ENSRNA049479077	down
Zm00001d001206	down
Zm00001d008793	down
Zm00001d048520	down
Zm00001d039000	down
ENSRNA049478949	down
ENSRNA049478167	down
Zm00001d039912	down
Zm00001d034324	down
Zm00001d016128	down
Zm00001d012939	down
Zm00001d047503	down
Zm00001d012069	down
Zm00001d020954	down
Zm00001d027522	down
Zm00001d022459	down
ENSRNA049477080	down
Zm00001d009416	down
Zm00001d033862	down
Zm00001d034946	down
Zm00001d043289	down
Zm00001d014648	down
Zm00001d047478	down
Zm00001d051974	down
Zm00001d028588	down
Zm00001d048629	down
Zm00001d034643	down
Zm00001d022415	down
Zm00001d003884	down
Zm00001d029806	down
ZeamMp092	down
Zm00001d000294	down
Zm00001d000970	down
Zm00001d026194	down
Zm00001d028561	down
Zm00001d029525	down
Zm00001d010554	down
Zm00001d027423	down
ENSRNA049478201	down
Zm00001d009907	down
Zm00001d026012	down
Zm00001d032923	down
ENSRNA049465110	down
Zm00001d037715	down
Zm00001d006170	down
Zm00001d025576	down
Zm00001d034447	down
Zm00001d042420	down
Zm00001d010279	down
Zm00001d046765	down
Zm00001d048013	down
Zm00001d045460	down
ENSRNA049478534	down
Zm00001d042243	down
Zm00001d021186	down
Zm00001d003304	down
Zm00001d033943	down
Zm00001d047050	down
Zm00001d039944	down
Zm00001d014074	down
Zm00001d004209	down
Zm00001d005193	down
Zm00001d007166	down
Zm00001d014667	down
Zm00001d003930	down
Zm00001d052371	down
Zm00001d038063	down
Zm00001d034382	down
Zm00001d046673	down
Zm00001d011051	down
Zm00001d046937	down
Zm00001d007581	down
Zm00001d029783	down
Zm00001d038806	down
Zm00001d008812	down
Zm00001d034642	down
Zm00001d002158	down
Zm00001d042217	down
Zm00001d040298	down
Zm00001d051223	down
Zm00001d048736	down
Zm00001d010175	down
Zm00001d042104	down
Zm00001d001414	down
ENSRNA049479033	down
Zm00001d008819	down
Zm00001d008214	down
Zm00001d012427	down
Zm00001d012304	down
Zm00001d009701	down
Zm00001d001276	down
Zm00001d052060	down
Zm00001d046574	down
Zm00001d004837	down
Zm00001d039166	down
Zm00001d027881	down
Zm00001d037480	down
Zm00001d047480	down
Zm00001d002549	down
Zm00001d025646	down
Zm00001d000447	down
Zm00001d038061	down
Zm00001d043586	down
Zm00001d021773	down
Zm00001d012532	down
Zm00001d000526	down
ZeamMp137	down
ENSRNA049479889	down
Zm00001d017397	down
ZeamMp161	down
Zm00001d012767	down
Zm00001d047077	down
Zm00001d046632	down
Zm00001d027532	down
Zm00001d049016	down
Zm00001d034601	down
Zm00001d039566	down
Zm00001d004918	down
Zm00001d000977	down
Zm00001d022376	down
Zm00001d026367	down
Zm00001d016469	down
Zm00001d022518	down
Zm00001d008539	down
Zm00001d025278	down
Zm00001d034031	down
Zm00001d042926	down
Zm00001d028968	down
Zm00001d031290	down
Zm00001d053365	down
Zm00001d002043	down
ZeamMp051	down
Zm00001d044864	down
ZeamMp157	down
Zm00001d040460	down
Zm00001d016728	down
ZeamMp094	down
Zm00001d016160	down
Zm00001d044426	down
Zm00001d020470	down
Zm00001d032030	down
Zm00001d011434	down
Zm00001d023385	down
Zm00001d018107	down
Zm00001d020631	down
ENSRNA049479257	down
Zm00001d039098	down
Zm00001d000203	down
Zm00001d029601	down
Zm00001d003607	down
Zm00001d020332	down
Zm00001d028408	down
Zm00001d048478	down
Zm00001d032295	down
Zm00001d028182	down
Zm00001d044027	down
Zm00001d024143	down
Zm00001d026029	down
Zm00001d022154	down
Zm00001d032561	down
Zm00001d022315	down
Zm00001d006059	down
Zm00001d035266	down
Zm00001d025166	down
Zm00001d035440	down
Zm00001d005692	down
Zm00001d028303	down
Zm00001d027361	down
Zm00001d025142	down
Zm00001d021933	down
Zm00001d051577	down
Zm00001d047847	down
Zm00001d039772	down
Zm00001d014790	down
Zm00001d040028	down
Zm00001d001082	down
Zm00001d045455	down
Zm00001d014617	down
Zm00001d043849	down
Zm00001d047664	down
Zm00001d051699	down
Zm00001d007274	down
Zm00001d045905	down
Zm00001d034723	down
Zm00001d025887	down
Zm00001d044529	down
Zm00001d000967	down
Zm00001d043912	down
ZemaCp003	down
Zm00001d008666	down
Zm00001d028311	down
Zm00001d013021	down
Zm00001d000523	down
Zm00001d029172	down
Zm00001d033300	down
Zm00001d052079	down
Zm00001d023601	down
Zm00001d037610	down
Zm00001d042933	down
Zm00001d038471	down
Zm00001d037052	down
Zm00001d038793	down
Zm00001d028870	down
Zm00001d002799	down
Zm00001d046922	down
Zm00001d014412	down
Zm00001d009082	down
Zm00001d043444	down
Zm00001d042811	down
Zm00001d051340	down
Zm00001d036787	down
Zm00001d031315	down
Zm00001d027708	down
Zm00001d042572	down
Zm00001d041567	down
Zm00001d043043	down
Zm00001d008546	down
Zm00001d008340	down
Zm00001d012010	down
Zm00001d003924	down
Zm00001d033924	down
Zm00001d036499	down
Zm00001d045476	down
Zm00001d000849	down
Zm00001d043390	down
Zm00001d051475	down
Zm00001d018893	down
Zm00001d035494	down
Zm00001d040118	down
Zm00001d038450	down
Zm00001d013845	down
Zm00001d029820	down
Zm00001d020793	down
Zm00001d025140	down
Zm00001d038523	down
Zm00001d029304	down
Zm00001d038717	down
Zm00001d048073	down
Zm00001d011131	down
Zm00001d030902	down
Zm00001d002488	down
Zm00001d042826	down
Zm00001d029701	down
ZeamMp032	down
Zm00001d021006	down
Zm00001d047330	down
Zm00001d021208	down
Zm00001d027419	down
Zm00001d026447	down
Zm00001d018699	down
Zm00001d029679	down
Zm00001d031013	down
Zm00001d022227	down
Zm00001d002623	down
Zm00001d044100	down
Zm00001d024903	down
Zm00001d043782	down
Zm00001d003301	down
Zm00001d047560	down
Zm00001d020976	down
Zm00001d005998	down
Zm00001d018667	down
Zm00001d002432	down
ZeamMp179	down
Zm00001d021192	down
Zm00001d021851	down
Zm00001d036880	down
Zm00001d046958	down
Zm00001d000126	down
Zm00001d032329	down
Zm00001d022886	down
Zm00001d031653	down
Zm00001d004231	down
Zm00001d049364	down
Zm00001d012703	down
Zm00001d052206	down
Zm00001d029696	down
Zm00001d020272	down
Zm00001d042449	down
Zm00001d037317	down
Zm00001d004480	down
Zm00001d020898	down
Zm00001d042589	down
Zm00001d040483	down
Zm00001d033633	down
Zm00001d032560	down
Zm00001d005889	down
Zm00001d018231	down
Zm00001d042114	down
Zm00001d024371	down
Zm00001d051365	down
Zm00001d002782	down
Zm00001d039531	down
Zm00001d021752	down
Zm00001d048006	down
Zm00001d023799	down
Zm00001d036780	down
Zm00001d013638	down
Zm00001d002535	down
Zm00001d014755	down
Zm00001d012068	down
Zm00001d027338	down
ZeamMp030	down
Zm00001d044167	down
Zm00001d017256	down
Zm00001d009568	down
Zm00001d044159	down
Zm00001d018632	down
Zm00001d013565	down
Zm00001d043932	down
Zm00001d046961	down
Zm00001d034615	down
Zm00001d035462	down
Zm00001d035636	down
Zm00001d043969	down
Zm00001d044798	down
Zm00001d022130	down
Zm00001d053042	down
Zm00001d027742	down
Zm00001d049940	down
Zm00001d039907	down
Zm00001d017537	down
Zm00001d012255	down
Zm00001d026126	down
Zm00001d043525	down
Zm00001d010261	down
Zm00001d026371	down
Zm00001d038974	down
Zm00001d052766	down
Zm00001d027550	down
ZeamMp098	down
Zm00001d007079	down
Zm00001d028129	down
Zm00001d004916	down
Zm00001d009112	down
Zm00001d033767	down
Zm00001d001711	down
Zm00001d032810	down
Zm00001d048344	down
Zm00001d048424	down
Zm00001d040048	down
Zm00001d002618	down
Zm00001d022360	down
Zm00001d017290	down
Zm00001d012632	down
Zm00001d023694	down
Zm00001d035214	down
Zm00001d036737	down
Zm00001d014842	down
Zm00001d039513	down
Zm00001d002360	down
Zm00001d018729	down
Zm00001d000028	down
Zm00001d022678	down
Zm00001d009083	down
Zm00001d030858	down
Zm00001d018017	down
Zm00001d032343	down
Zm00001d002928	down
Zm00001d050346	down
Zm00001d043290	down
Zm00001d021414	down
Zm00001d012720	down
Zm00001d028820	down
Zm00001d024160	down
Zm00001d039495	down
Zm00001d018973	down
Zm00001d024621	down
Zm00001d035454	down
Zm00001d024291	down
Zm00001d030850	down
Zm00001d038874	down
Zm00001d035270	down
Zm00001d020137	down
Zm00001d002974	down
ZeamMp136	down
Zm00001d019693	down
Zm00001d021711	down
Zm00001d045370	down
Zm00001d051139	down
Zm00001d007764	down
Zm00001d003469	down
Zm00001d017068	down
Zm00001d033859	down
Zm00001d041996	down
Zm00001d020521	down
Zm00001d050716	down
Zm00001d019890	down
Zm00001d052172	down
Zm00001d023294	down
Zm00001d031740	down
Zm00001d016016	down
Zm00001d029983	down
Zm00001d012430	down
Zm00001d045644	down
Zm00001d049686	down
Zm00001d017951	down
Zm00001d002159	down
Zm00001d021336	down
Zm00001d023669	down
Zm00001d018473	down
Zm00001d052059	down
Zm00001d020396	down
Zm00001d012293	down
Zm00001d038720	down
Zm00001d036298	down
Zm00001d053433	down
Zm00001d032363	down
Zm00001d033280	down
Zm00001d028557	down
Zm00001d017762	down
Zm00001d032311	down
Zm00001d025266	down
Zm00001d023995	down
Zm00001d013568	down
Zm00001d025624	down
Zm00001d029506	down
Zm00001d010171	down
Zm00001d048135	down
Zm00001d003265	down
Zm00001d038907	down
Zm00001d003041	down
Zm00001d010529	down
Zm00001d013809	down
Zm00001d018292	down
Zm00001d016982	down
Zm00001d014200	down
Zm00001d018849	down
Zm00001d026440	down
Zm00001d028577	down
Zm00001d028992	down
Zm00001d029755	down
Zm00001d013635	down
Zm00001d005842	down
Zm00001d005888	down
Zm00001d037623	down
Zm00001d041549	down
Zm00001d034495	down
Zm00001d040670	down
Zm00001d051121	down
Zm00001d018106	down
Zm00001d002557	down
Zm00001d018847	down
Zm00001d047752	down
Zm00001d008712	down
Zm00001d034420	down
Zm00001d034278	down
Zm00001d043205	down
Zm00001d002576	down
Zm00001d017682	down
Zm00001d005978	down
Zm00001d052261	down
ZeamMp091	down
Zm00001d036226	down
Zm00001d051611	down
Zm00001d001862	down
Zm00001d038884	down
Zm00001d029389	down
Zm00001d038918	down
Zm00001d027258	down
Zm00001d018461	down
Zm00001d003888	down
Zm00001d003009	down
Zm00001d042665	down
Zm00001d014463	down
Zm00001d029028	down
Zm00001d044425	down
Zm00001d017788	down
Zm00001d050828	down
Zm00001d051659	down
Zm00001d047995	down
Zm00001d006563	down
Zm00001d046993	down
Zm00001d001883	down
Zm00001d023510	down
Zm00001d051420	down
Zm00001d026288	down
Zm00001d014794	down
Zm00001d011403	down
Zm00001d031503	down
Zm00001d047210	down
Zm00001d013909	down
Zm00001d018200	down
Zm00001d043180	down
Zm00001d020530	down
Zm00001d039112	down
Zm00001d043474	down
Zm00001d006437	down
Zm00001d039374	down
Zm00001d012419	down
Zm00001d024778	down
Zm00001d030613	down
Zm00001d047851	down
Zm00001d048227	down
Zm00001d046981	down
Zm00001d020639	down
Zm00001d011599	down
Zm00001d015227	down
Zm00001d046767	down
Zm00001d029067	down
Zm00001d035569	down
Zm00001d037574	down
Zm00001d016299	down
Zm00001d025943	down
Zm00001d048460	down
Zm00001d044966	down
Zm00001d017984	down
Zm00001d032008	down
Zm00001d003538	down
Zm00001d014559	down
Zm00001d036839	down
Zm00001d047732	down
Zm00001d007271	down
Zm00001d052727	down
Zm00001d012420	down
Zm00001d045657	down
Zm00001d048203	down
Zm00001d029402	down
Zm00001d003648	down
Zm00001d044634	down
Zm00001d043221	down
Zm00001d039065	down
Zm00001d018342	down
Zm00001d006701	down
Zm00001d031434	down
Zm00001d043723	down
Zm00001d031580	down
Zm00001d038999	down
Zm00001d031545	down
Zm00001d045204	down
Zm00001d029163	down
Zm00001d001951	down
Zm00001d017486	down
Zm00001d021943	down
Zm00001d034198	down
Zm00001d049091	down
Zm00001d039991	down
Zm00001d038060	down
Zm00001d026557	down
Zm00001d024645	down
Zm00001d043399	down
Zm00001d051584	down
Zm00001d053803	down
Zm00001d022504	down
Zm00001d037717	down
Zm00001d036940	down
Zm00001d043904	down
Zm00001d017417	down
Zm00001d039913	down
Zm00001d038080	down
Zm00001d042078	down
Zm00001d012282	down
Zm00001d014666	down
Zm00001d010968	down
Zm00001d005609	down
Zm00001d025484	down
Zm00001d021244	down
Zm00001d011918	down
Zm00001d047290	down
Zm00001d050811	down
Zm00001d028966	down
Zm00001d045312	down
Zm00001d038582	down
Zm00001d050466	down
Zm00001d017807	down
Zm00001d022435	down
Zm00001d002520	down
Zm00001d042881	down
Zm00001d047579	down
Zm00001d029974	down
Zm00001d016719	down
Zm00001d017852	down
Zm00001d049768	down
Zm00001d002302	down
Zm00001d008500	down
Zm00001d051511	down
Zm00001d020110	down
Zm00001d029605	down
Zm00001d039851	down
Zm00001d006549	down
Zm00001d050893	down
Zm00001d001349	down
Zm00001d051645	down
Zm00001d029052	down
Zm00001d032470	down
Zm00001d041604	down
Zm00001d020190	down
Zm00001d002521	down
Zm00001d039412	down
Zm00001d019069	down
Zm00001d027652	down
Zm00001d018393	down
Zm00001d000840	down
Zm00001d004006	down
Zm00001d025580	down
Zm00001d037435	down
Zm00001d029388	down
Zm00001d021224	down
Zm00001d042714	down
Zm00001d026368	down
Zm00001d016271	down
Zm00001d047554	down
Zm00001d027899	down
Zm00001d031278	down
Zm00001d038846	down
Zm00001d022243	down
Zm00001d025247	down
Zm00001d002364	down
Zm00001d016438	down
Zm00001d002847	down
Zm00001d027622	down
Zm00001d003775	down
Zm00001d011639	down
Zm00001d022062	down
Zm00001d010652	down
Zm00001d018831	down
Zm00001d034356	down
Zm00001d041437	down
Zm00001d018297	down
Zm00001d010079	down
Zm00001d002700	down
Zm00001d029476	down
Zm00001d011050	down
Zm00001d025229	down
Zm00001d013551	down
Zm00001d013398	down
Zm00001d033385	down
Zm00001d043613	down
Zm00001d021579	down
Zm00001d023461	down
Zm00001d052903	down
Zm00001d050618	down
Zm00001d012402	down
Zm00001d011073	down
Zm00001d046887	down
Zm00001d004972	down
Zm00001d029572	down
Zm00001d025099	down
Zm00001d020170	down
Zm00001d049643	down
Zm00001d042425	down
Zm00001d029595	down
Zm00001d043181	down
Zm00001d024772	down
Zm00001d029438	down
Zm00001d048281	down
Zm00001d031773	down
Zm00001d003712	down
Zm00001d007865	down
Zm00001d000329	down
Zm00001d023664	down
Zm00001d027948	down
Zm00001d024378	down
Zm00001d013669	down
Zm00001d005177	down
Zm00001d018868	down
Zm00001d021207	down
Zm00001d018201	down
Zm00001d047973	down
Zm00001d012748	down
Zm00001d024674	down
Zm00001d038862	down
Zm00001d050238	down
Zm00001d047387	down
Zm00001d018122	down
Zm00001d051592	down
Zm00001d039156	down
Zm00001d049501	down
Zm00001d026278	down
Zm00001d043419	down
Zm00001d011401	down
Zm00001d039565	down
Zm00001d031636	down
Zm00001d042211	down
Zm00001d012494	down
Zm00001d001773	down
Zm00001d000224	down
Zm00001d010131	down
Zm00001d040026	down
Zm00001d028007	down
Zm00001d006022	down
Zm00001d047187	down
Zm00001d021420	down
Zm00001d020692	down
Zm00001d026452	down
Zm00001d047555	down
Zm00001d039615	down
Zm00001d044300	down
Zm00001d033799	down
Zm00001d053897	down
Zm00001d042796	down
Zm00001d035501	down
Zm00001d052902	down
Zm00001d024489	down
Zm00001d044056	down
Zm00001d017141	down
Zm00001d049381	down
Zm00001d031167	down
Zm00001d032371	down
Zm00001d039135	down
Zm00001d027957	down
Zm00001d008923	down
Zm00001d021160	down
Zm00001d014737	down
Zm00001d021667	down
Zm00001d052126	down
Zm00001d005826	down
Zm00001d015626	down
Zm00001d048595	down
Zm00001d042837	down
Zm00001d038003	down
Zm00001d026028	down
Zm00001d006230	down
Zm00001d016996	down
Zm00001d022449	down
Zm00001d028718	down
Zm00001d007357	down
Zm00001d043314	down
Zm00001d024631	down
Zm00001d041393	down
Zm00001d049730	down
Zm00001d029371	down
Zm00001d049068	down
Zm00001d006626	down
Zm00001d015434	down
Zm00001d006220	down
Zm00001d007892	down
Zm00001d023477	down
Zm00001d051617	down
Zm00001d047260	down
Zm00001d042400	down
Zm00001d043220	down
Zm00001d016364	down
Zm00001d016474	down
Zm00001d006016	down
Zm00001d020926	down
Zm00001d024256	down
Zm00001d042245	down
Zm00001d049101	down
Zm00001d029529	down
Zm00001d037609	down
Zm00001d040035	down
Zm00001d037550	down
Zm00001d050347	down
Zm00001d022790	down
Zm00001d002410	down
Zm00001d034407	down
Zm00001d027992	down
Zm00001d023216	down
Zm00001d040857	down
Zm00001d005503	down
Zm00001d041054	down
Zm00001d004998	down
Zm00001d018045	down
Zm00001d014016	down
Zm00001d009309	down
Zm00001d034163	down
Zm00001d037625	down
Zm00001d020390	down
Zm00001d011079	down
Zm00001d026333	down
Zm00001d020980	down
Zm00001d019034	down
Zm00001d022241	down
Zm00001d037766	down
Zm00001d039757	down
Zm00001d000279	down
Zm00001d043087	down
Zm00001d005030	down
Zm00001d021836	down
Zm00001d040561	down
Zm00001d052189	down
Zm00001d012585	down
Zm00001d033210	down
Zm00001d022448	down
Zm00001d054034	down
Zm00001d007962	down
Zm00001d016977	down
Zm00001d040852	down
Zm00001d038300	down
Zm00001d046966	down
Zm00001d002408	down
Zm00001d003400	down
Zm00001d012401	down
Zm00001d022561	down
Zm00001d025557	down
Zm00001d013228	down
Zm00001d029373	down
Zm00001d011657	down
Zm00001d022569	down
Zm00001d021978	down
Zm00001d012480	down
Zm00001d039338	down
Zm00001d000522	down
Zm00001d014486	down
Zm00001d052180	down
Zm00001d042056	down
Zm00001d030727	down
Zm00001d043156	down
Zm00001d038850	down
Zm00001d031168	down
Zm00001d027355	down
Zm00001d039328	down
Zm00001d027804	down
Zm00001d001006	down
Zm00001d020670	down
Zm00001d013326	down
Zm00001d049254	down
Zm00001d029898	down
Zm00001d039103	down
Zm00001d020550	down
Zm00001d034433	down
Zm00001d002415	down
Zm00001d020925	down
Zm00001d012292	down
Zm00001d013933	down
Zm00001d005109	down
Zm00001d042388	down
Zm00001d039715	down
Zm00001d005462	down
Zm00001d050172	down
Zm00001d037334	down
Zm00001d012993	down
Zm00001d030194	down
Zm00001d042213	down
Zm00001d053661	down
Zm00001d031555	down
Zm00001d042721	down
Zm00001d022513	down
Zm00001d016388	down
Zm00001d026487	down
Zm00001d031546	down
Zm00001d053220	down
Zm00001d029853	down
Zm00001d035624	down
Zm00001d020620	down
Zm00001d015496	down
Zm00001d036838	down
Zm00001d013886	down
Zm00001d017591	down
Zm00001d028094	down
Zm00001d039014	down
Zm00001d041580	down
Zm00001d018407	down
Zm00001d013202	down
Zm00001d046634	down
Zm00001d040710	down
Zm00001d007503	down
Zm00001d037652	down
Zm00001d017991	down
Zm00001d014493	down
Zm00001d031586	down
Zm00001d029922	down
Zm00001d020983	down
Zm00001d029934	down
Zm00001d029102	down
Zm00001d002966	down
Zm00001d026072	down
Zm00001d016873	down
Zm00001d044752	down
Zm00001d017014	down
Zm00001d007329	down
Zm00001d051456	down
Zm00001d039530	down
Zm00001d018081	down
Zm00001d003112	down
Zm00001d052033	down
Zm00001d008911	down
Zm00001d029183	down
Zm00001d053926	down
Zm00001d037207	down
Zm00001d024018	down
Zm00001d053995	down
Zm00001d047801	down
Zm00001d022420	down
Zm00001d052962	down
Zm00001d039827	down
Zm00001d041472	down
Zm00001d013163	down
Zm00001d035029	down
Zm00001d042642	down
Zm00001d028721	down
Zm00001d026584	down
Zm00001d038524	down
Zm00001d008810	down
Zm00001d020697	down
Zm00001d039993	down
Zm00001d039280	down
Zm00001d026617	down
Zm00001d021803	down
Zm00001d047883	down
Zm00001d049176	down
Zm00001d034461	down
Zm00001d028947	down
Zm00001d020364	down
Zm00001d012341	down
Zm00001d033805	down
Zm00001d014282	down
Zm00001d032324	down
Zm00001d012005	down
Zm00001d027757	down
Zm00001d051756	down
Zm00001d027988	down
Zm00001d042361	down
Zm00001d045036	down
Zm00001d044662	down
Zm00001d047517	down
Zm00001d039512	down
Zm00001d029444	down
Zm00001d017925	down
Zm00001d012471	down
Zm00001d038017	down
Zm00001d016625	down
Zm00001d046718	down
Zm00001d026253	down
Zm00001d002347	down
Zm00001d033955	down
Zm00001d003197	down
Zm00001d028642	down
Zm00001d027884	down
Zm00001d005647	down
Zm00001d003358	down
Zm00001d037204	down
Zm00001d022451	down
Zm00001d029348	down
Zm00001d032496	down
Zm00001d019220	down
Zm00001d009874	down
Zm00001d034596	down
Zm00001d016679	down
Zm00001d003789	down
Zm00001d018941	down
Zm00001d043125	down
Zm00001d031044	down
Zm00001d028344	down
Zm00001d047493	down
Zm00001d000041	down
Zm00001d014491	down
Zm00001d018103	down
Zm00001d029704	down
Zm00001d017997	down
Zm00001d053991	down
Zm00001d000424	down
Zm00001d002316	down
Zm00001d027483	down
Zm00001d002811	down
Zm00001d027037	down
Zm00001d042214	down
Zm00001d015319	down
Zm00001d038578	down
Zm00001d043911	down
Zm00001d038815	down
Zm00001d001949	down
Zm00001d007076	down
Zm00001d036278	down
Zm00001d014521	down
Zm00001d025274	down
Zm00001d029387	down
Zm00001d018994	down
Zm00001d017103	down
Zm00001d021288	down
Zm00001d026608	down
Zm00001d043808	down
Zm00001d005920	down
Zm00001d041331	down
Zm00001d013878	down
Zm00001d033872	down
Zm00001d014780	down
Zm00001d049112	down
Zm00001d034453	down
Zm00001d019684	down
Zm00001d052628	down
Zm00001d025774	down
Zm00001d007175	down
Zm00001d027900	down
Zm00001d010368	down
Zm00001d022380	down
Zm00001d015050	down
Zm00001d029667	down
Zm00001d026401	down
Zm00001d033222	down
Zm00001d044688	down
Zm00001d010401	down
Zm00001d028568	down
Zm00001d025480	down
Zm00001d022516	down
Zm00001d010104	down
Zm00001d040536	down
Zm00001d010725	down
Zm00001d013300	down
Zm00001d016570	down
Zm00001d047582	down
Zm00001d030888	down
Zm00001d018902	down
Zm00001d012228	down
Zm00001d006551	down
Zm00001d027588	down
Zm00001d040034	down
Zm00001d038557	down
Zm00001d022400	down
Zm00001d035603	down
Zm00001d015614	down
Zm00001d018827	down
Zm00001d016278	down
Zm00001d003613	down
Zm00001d027929	down
Zm00001d014770	down
Zm00001d002952	down
Zm00001d042437	down
Zm00001d007835	down
Zm00001d000098	down
Zm00001d043862	down
Zm00001d024083	down
Zm00001d008992	down
Zm00001d035474	down
Zm00001d013216	down
Zm00001d000707	down
Zm00001d044769	down
Zm00001d019279	down
Zm00001d039091	down
Zm00001d051373	down
Zm00001d001933	down
Zm00001d049508	down
Zm00001d054015	down
Zm00001d016969	down
Zm00001d040793	down
Zm00001d032771	down
Zm00001d052639	down
Zm00001d034722	down
Zm00001d020612	down
Zm00001d030990	down
Zm00001d042625	down
Zm00001d054001	down
Zm00001d049939	down
Zm00001d001358	down
Zm00001d034423	down
Zm00001d005179	down
Zm00001d012836	down
Zm00001d024591	down
Zm00001d048234	down
Zm00001d032609	down
Zm00001d052053	down
Zm00001d032671	down
Zm00001d011969	down
Zm00001d012857	down
Zm00001d039831	down
Zm00001d010594	down
Zm00001d039624	down
Zm00001d017353	down
Zm00001d053859	down
Zm00001d053398	down
Zm00001d013289	down
Zm00001d020366	down
Zm00001d022132	down
Zm00001d004510	down
Zm00001d043945	down
Zm00001d013097	down
Zm00001d009686	down
Zm00001d003494	down
Zm00001d051302	down
Zm00001d048671	down
Zm00001d048349	down
Zm00001d047779	down
Zm00001d052993	down
Zm00001d029195	down
Zm00001d029151	down
Zm00001d017955	down
Zm00001d009177	down
Zm00001d042541	down
Zm00001d034487	down
Zm00001d031133	down
Zm00001d007277	down
Zm00001d049109	down
Zm00001d009556	down
Zm00001d011379	down
Zm00001d046305	down
Zm00001d033484	down
Zm00001d008181	down
Zm00001d015520	down
Zm00001d013549	down
Zm00001d017700	down
Zm00001d021250	down
Zm00001d033004	down
Zm00001d053068	down
Zm00001d045396	down
Zm00001d024164	down
Zm00001d032578	down
Zm00001d002826	down
Zm00001d015515	down
Zm00001d011656	down
Zm00001d011751	down
Zm00001d012460	down
Zm00001d014949	down
Zm00001d044323	down
Zm00001d029475	down
Zm00001d034435	down
Zm00001d025903	down
Zm00001d019632	down
Zm00001d032483	down
Zm00001d005834	down
Zm00001d041229	down
Zm00001d009315	down
Zm00001d042551	down
Zm00001d010618	down
Zm00001d002356	down
Zm00001d031325	down
Zm00001d043573	down
Zm00001d007901	down
Zm00001d007339	down
Zm00001d049126	down
Zm00001d032608	down
Zm00001d017547	down
Zm00001d036972	down
Zm00001d024732	down
Zm00001d036079	down
Zm00001d015308	down
Zm00001d029217	down
Zm00001d051061	down
Zm00001d014299	down
Zm00001d011813	down
Zm00001d025075	down
Zm00001d044671	down
Zm00001d010271	down
Zm00001d032358	down
Zm00001d015009	down
Zm00001d030379	down
Zm00001d045784	down
Zm00001d040785	down
Zm00001d034784	down
Zm00001d024854	down
Zm00001d037608	down
Zm00001d028328	down
Zm00001d049171	down
Zm00001d038190	down
Zm00001d014649	down
Zm00001d052015	down
Zm00001d006401	down
Zm00001d034733	down
Zm00001d038194	down
Zm00001d037094	down
Zm00001d052485	down
Zm00001d011193	down
Zm00001d030032	down
Zm00001d044327	down
Zm00001d018989	down
Zm00001d014865	down
Zm00001d036736	down
Zm00001d027844	down
Zm00001d040627	down
Zm00001d016876	down
Zm00001d014338	down
Zm00001d053236	down
Zm00001d016818	down
Zm00001d052034	down
Zm00001d039730	down
Zm00001d005975	down
Zm00001d038608	down
Zm00001d013625	down
Zm00001d046509	down
Zm00001d047900	down
Zm00001d033423	down
Zm00001d012047	down
Zm00001d035538	down
Zm00001d017645	down
Zm00001d004546	down
Zm00001d040888	down
Zm00001d024403	down
Zm00001d008756	down
Zm00001d030985	down
Zm00001d031923	down
Zm00001d007352	down
Zm00001d039914	down
Zm00001d020717	down
Zm00001d027405	down
Zm00001d037719	down
Zm00001d003386	down
Zm00001d049762	down
Zm00001d053988	down
Zm00001d051451	down
Zm00001d009097	down
Zm00001d024379	down
Zm00001d021344	down
Zm00001d019857	down
Zm00001d024411	down
Zm00001d037338	down
Zm00001d046422	down
Zm00001d051854	down
Zm00001d044024	down
Zm00001d047470	down
Zm00001d043480	down
Zm00001d022536	down
Zm00001d049081	down
Zm00001d040726	down
Zm00001d034237	down
Zm00001d047835	down
Zm00001d025798	down
Zm00001d012398	down
Zm00001d043270	down
Zm00001d041993	down
Zm00001d017866	down
Zm00001d000270	down
Zm00001d019039	down
Zm00001d013712	down
Zm00001d031723	down
Zm00001d039285	down
Zm00001d024082	down
Zm00001d014519	down
Zm00001d026321	down
Zm00001d021665	down
Zm00001d010445	down
Zm00001d051689	down
Zm00001d034561	down
Zm00001d002033	down
Zm00001d007102	down
Zm00001d029075	down
Zm00001d005110	down
ENSRNA049479595	down
Zm00001d043935	down
Zm00001d010632	down
Zm00001d002072	down
Zm00001d010256	down
Zm00001d031104	down
Zm00001d032404	down
Zm00001d011063	down
Zm00001d010052	down
Zm00001d000302	down
Zm00001d000709	down
Zm00001d015810	down
Zm00001d053416	down
Zm00001d051336	down
Zm00001d051008	down
Zm00001d034525	down
Zm00001d033714	down
Zm00001d015362	down
Zm00001d010282	down
Zm00001d042549	down
Zm00001d010308	down
Zm00001d027254	down
Zm00001d047994	down
Zm00001d037949	down
Zm00001d009700	down
Zm00001d035171	down
Zm00001d023824	down
Zm00001d038746	down
Zm00001d048345	down
Zm00001d045382	down
Zm00001d016322	down
Zm00001d016567	down
Zm00001d054067	down
Zm00001d051338	down
Zm00001d032091	down
Zm00001d021705	down
Zm00001d049964	down
Zm00001d032408	down
Zm00001d029361	down
Zm00001d050937	down
Zm00001d017174	down
Zm00001d003545	down
Zm00001d043193	down
Zm00001d012888	down
Zm00001d022526	down
Zm00001d005439	down
Zm00001d024425	down
Zm00001d014007	down
Zm00001d036784	down
Zm00001d003566	down
Zm00001d023252	down
Zm00001d014381	down
Zm00001d023874	down
Zm00001d019553	down
Zm00001d044270	down
Zm00001d001267	down
Zm00001d011111	down
Zm00001d015777	down
Zm00001d004120	down
Zm00001d047346	down
Zm00001d032557	down
Zm00001d030891	down
Zm00001d031945	down
Zm00001d041583	down
Zm00001d005256	down
Zm00001d028744	down
Zm00001d045873	down
Zm00001d032625	down
Zm00001d053875	down
Zm00001d029937	down
Zm00001d032186	down
Zm00001d008961	down
Zm00001d012199	down
Zm00001d023987	down
Zm00001d028566	down
Zm00001d003248	down
Zm00001d000506	down
Zm00001d053667	down
Zm00001d001756	down
Zm00001d049585	down
Zm00001d018217	down
Zm00001d039349	down
Zm00001d016655	down
Zm00001d025339	down
Zm00001d040076	down
Zm00001d020510	down
Zm00001d013786	down
Zm00001d029237	down
Zm00001d017468	down
Zm00001d050514	down
Zm00001d001694	down
Zm00001d005630	down
Zm00001d036765	down
Zm00001d028086	down
Zm00001d051415	down
Zm00001d020640	down
Zm00001d045320	down
Zm00001d047831	down
Zm00001d046510	down
Zm00001d042627	down
Zm00001d025421	down
Zm00001d006601	down
Zm00001d041861	down
Zm00001d051053	down
Zm00001d054110	down
Zm00001d032475	down
Zm00001d038224	down
Zm00001d051676	down
Zm00001d014816	down
Zm00001d044182	down
Zm00001d006340	down
Zm00001d012132	down
Zm00001d047058	down
Zm00001d012492	down
Zm00001d030666	down
Zm00001d002012	down
Zm00001d012714	down
Zm00001d031187	down
Zm00001d009394	down
Zm00001d026540	down
Zm00001d028804	down
Zm00001d002754	down
Zm00001d002137	down
Zm00001d038685	down
Zm00001d016585	down
Zm00001d009609	down
Zm00001d006942	down
Zm00001d049211	down
Zm00001d028304	down
Zm00001d012380	down
Zm00001d024546	down
Zm00001d026223	down
Zm00001d038794	down
Zm00001d031835	down
Zm00001d011276	down
Zm00001d021734	down
Zm00001d025126	down
Zm00001d029321	down
Zm00001d051344	down
Zm00001d052239	down
Zm00001d018440	down
Zm00001d019344	down
Zm00001d013571	down
Zm00001d003334	down
Zm00001d054011	down
Zm00001d043588	down
Zm00001d015025	down
Zm00001d010704	down
Zm00001d005536	down
Zm00001d005495	down
Zm00001d027462	down
Zm00001d051890	down
Zm00001d032672	down
Zm00001d049738	down
Zm00001d047059	down
Zm00001d047422	down
Zm00001d038969	down
Zm00001d038795	down
Zm00001d024575	down
Zm00001d053936	down
Zm00001d020714	down
Zm00001d017730	down
Zm00001d006169	down
Zm00001d005312	up
Zm00001d044597	up
Zm00001d029105	up
Zm00001d026335	up
Zm00001d051544	up
Zm00001d026649	up
Zm00001d010044	up
Zm00001d008329	up
Zm00001d014898	up
Zm00001d047581	up
Zm00001d043325	up
Zm00001d005693	up
Zm00001d025397	up
Zm00001d045948	up
Zm00001d018034	up
Zm00001d017528	up
Zm00001d019688	up
Zm00001d024961	up
Zm00001d043735	up
Zm00001d052630	up
Zm00001d006590	up
Zm00001d050637	up
Zm00001d021532	up
Zm00001d034007	up
Zm00001d015213	up
Zm00001d044723	up
Zm00001d052390	up
Zm00001d015129	up
Zm00001d006788	up
Zm00001d048320	up
Zm00001d022111	up
Zm00001d023927	up
Zm00001d042257	up
Zm00001d019758	up
Zm00001d050642	up
Zm00001d040144	up
Zm00001d027928	up
Zm00001d052906	up
Zm00001d021595	up
Zm00001d017092	up
Zm00001d038051	up
Zm00001d038485	up
Zm00001d007231	up
Zm00001d035002	up
Zm00001d019568	up
Zm00001d042620	up
Zm00001d018488	up
Zm00001d029084	up
Zm00001d018415	up
Zm00001d019106	up
Zm00001d043178	up
Zm00001d009028	up
Zm00001d027694	up
Zm00001d009222	up
Zm00001d027711	up
Zm00001d017887	up
Zm00001d014960	up
Zm00001d033018	up
Zm00001d033893	up
Zm00001d052494	up
Zm00001d026664	up
Zm00001d034892	up
Zm00001d003193	up
Zm00001d024071	up
Zm00001d027729	up
Zm00001d019555	up
Zm00001d043868	up
Zm00001d036322	up
Zm00001d028232	up
Zm00001d011104	up
Zm00001d011223	up
Zm00001d022169	up
Zm00001d028776	up
Zm00001d037958	up
Zm00001d002357	up
Zm00001d041839	up
Zm00001d001812	up
Zm00001d007518	up
Zm00001d024043	up
Zm00001d024105	up
Zm00001d005674	up
Zm00001d026307	up
Zm00001d045496	up
Zm00001d005449	up
Zm00001d009774	up
Zm00001d009488	up
Zm00001d006541	up
Zm00001d014961	up
Zm00001d031291	up
Zm00001d002789	up
Zm00001d047625	up
Zm00001d017748	up
Zm00001d039883	up
Zm00001d035212	up
Zm00001d051652	up
Zm00001d014090	up
Zm00001d011210	up
Zm00001d005909	up
Zm00001d029457	up
Zm00001d016167	up
Zm00001d015292	up
Zm00001d034118	up
Zm00001d002253	up
Zm00001d027558	up
Zm00001d003429	up
Zm00001d040519	up
Zm00001d024937	up
Zm00001d012033	up
Zm00001d050095	up
Zm00001d039563	up
Zm00001d031729	up
Zm00001d049579	up
Zm00001d005394	up
Zm00001d032539	up
Zm00001d009230	up
Zm00001d039687	up
Zm00001d033344	up
Zm00001d016863	up
Zm00001d053293	up
Zm00001d021620	up
Zm00001d010540	up
Zm00001d018925	up
Zm00001d021504	up
Zm00001d053580	up
Zm00001d015884	up
Zm00001d020755	up
Zm00001d046183	up
Zm00001d034042	up
Zm00001d028467	up
Zm00001d016926	up
Zm00001d001916	up
Zm00001d036010	up
Zm00001d045660	up
Zm00001d048688	up
Zm00001d015556	up
Zm00001d036877	up
Zm00001d001820	up
Zm00001d024373	up
Zm00001d045366	up
Zm00001d010500	up
Zm00001d001769	up
Zm00001d025654	up
Zm00001d041173	up
Zm00001d020306	up
Zm00001d039094	up
Zm00001d008224	up
Zm00001d013263	up
Zm00001d032386	up
Zm00001d048397	up
Zm00001d040988	up
Zm00001d002676	up
Zm00001d017438	up
Zm00001d032224	up
Zm00001d013941	up
Zm00001d019415	up
Zm00001d015791	up
Zm00001d036704	up
Zm00001d030556	up
Zm00001d029325	up
Zm00001d044230	up
Zm00001d006065	up
Zm00001d049009	up
Zm00001d008634	up
Zm00001d006454	up
Zm00001d032510	up
Zm00001d027967	up
Zm00001d044754	up
Zm00001d019948	up
Zm00001d014349	up
Zm00001d009220	up
Zm00001d052701	up
Zm00001d021959	up
Zm00001d039038	up
Zm00001d020569	up
Zm00001d014060	up
Zm00001d008327	up
Zm00001d038801	up
Zm00001d039579	up
Zm00001d025167	up
Zm00001d003947	up
Zm00001d039674	up
Zm00001d018077	up
Zm00001d018470	up
Zm00001d053593	up
Zm00001d021891	up
Zm00001d002485	up
Zm00001d043443	up
Zm00001d044513	up
Zm00001d037036	up
Zm00001d006697	up
Zm00001d020498	up
Zm00001d017320	up
Zm00001d008850	up
Zm00001d018318	up
Zm00001d039865	up
Zm00001d051367	up
Zm00001d015837	up
Zm00001d045565	up
Zm00001d028921	up
Zm00001d041998	up
Zm00001d042013	up
Zm00001d046642	up
Zm00001d032945	up
Zm00001d045926	up
Zm00001d051567	up
Zm00001d021334	up
Zm00001d033421	up
Zm00001d052842	up
Zm00001d011626	up
Zm00001d004855	up
Zm00001d037961	up
Zm00001d005685	up
Zm00001d008996	up
Zm00001d015476	up
Zm00001d042637	up
Zm00001d009317	up
Zm00001d012499	up
Zm00001d034104	up
Zm00001d025948	up
Zm00001d032284	up
Zm00001d030347	up
Zm00001d049234	up
Zm00001d042723	up
Zm00001d002185	up
Zm00001d022529	up
Zm00001d021897	up
Zm00001d041079	up
Zm00001d016203	up
Zm00001d014734	up
Zm00001d017540	up
Zm00001d010431	up
Zm00001d048373	up
Zm00001d012785	up
Zm00001d038549	up
Zm00001d026282	up
Zm00001d033533	up
Zm00001d032383	up
Zm00001d039414	up
Zm00001d045427	up
Zm00001d032828	up
Zm00001d041927	up
Zm00001d037278	up
Zm00001d033568	up
Zm00001d042169	up
Zm00001d004894	up
Zm00001d043620	up
Zm00001d039089	up
Zm00001d026618	up
Zm00001d007937	up
Zm00001d006374	up
Zm00001d040315	up
Zm00001d020638	up
Zm00001d024745	up
Zm00001d048308	up
Zm00001d002342	up
Zm00001d028762	up
Zm00001d019262	up
Zm00001d038923	up
Zm00001d051288	up
Zm00001d039221	up
Zm00001d052335	up
Zm00001d017830	up
Zm00001d023218	up
Zm00001d029580	up
Zm00001d042061	up
Zm00001d046938	up
Zm00001d048794	up
Zm00001d030127	up
Zm00001d049789	up
Zm00001d021535	up
Zm00001d048422	up
Zm00001d038848	up
Zm00001d037711	up
Zm00001d019089	up
Zm00001d038340	up
Zm00001d051387	up
Zm00001d035089	up
Zm00001d042978	up
Zm00001d023536	up
Zm00001d044283	up
Zm00001d023455	up
Zm00001d039270	up
Zm00001d019398	up
Zm00001d024245	up
Zm00001d027346	up
Zm00001d039842	up
Zm00001d018016	up
Zm00001d033898	up
Zm00001d049959	up
Zm00001d013873	up
Zm00001d002095	up
Zm00001d037328	up
Zm00001d028221	up
Zm00001d031221	up
Zm00001d051252	up
Zm00001d006596	up
Zm00001d020437	up
Zm00001d000087	up
Zm00001d049183	up
Zm00001d044312	up
Zm00001d030057	up
Zm00001d006853	up
Zm00001d003612	up
Zm00001d001788	up
Zm00001d035987	up
Zm00001d013262	up
Zm00001d011941	up
Zm00001d052809	up
Zm00001d038975	up
Zm00001d036152	up
Zm00001d025326	up
Zm00001d021639	up
Zm00001d034019	up
Zm00001d035032	up
Zm00001d050022	up
Zm00001d036608	up
Zm00001d025825	up
Zm00001d029150	up
Zm00001d052651	up
Zm00001d021716	up
Zm00001d019259	up
Zm00001d053352	up
Zm00001d013778	up
Zm00001d012840	up
Zm00001d040238	up
Zm00001d017008	up
Zm00001d005902	up
Zm00001d008287	up
Zm00001d026429	up
Zm00001d014444	up
Zm00001d003088	up
Zm00001d042961	up
Zm00001d032651	up
Zm00001d004335	up
Zm00001d031893	up
Zm00001d013063	up
Zm00001d035960	up
Zm00001d028787	up
Zm00001d047089	up
Zm00001d042528	up
Zm00001d012325	up
Zm00001d029519	up
Zm00001d034900	up
Zm00001d032973	up
Zm00001d014013	up
Zm00001d013542	up
Zm00001d005082	up
Zm00001d002067	up
Zm00001d005347	up
Zm00001d029254	up
Zm00001d010627	up
Zm00001d025891	up
Zm00001d023314	up
Zm00001d049929	up
Zm00001d031665	up
Zm00001d044421	up
Zm00001d039488	up
Zm00001d025747	up
Zm00001d037108	up
Zm00001d042088	up
Zm00001d018282	up
Zm00001d052221	up
Zm00001d049192	up
Zm00001d040933	up
Zm00001d023437	up
Zm00001d012862	up
Zm00001d017366	up
Zm00001d017814	up
Zm00001d032613	up
Zm00001d041697	up
Zm00001d023757	up
Zm00001d048238	up
Zm00001d004260	up
Zm00001d013979	up
Zm00001d032051	up
Zm00001d008178	up
Zm00001d016647	up
Zm00001d020740	up
Zm00001d000164	up
Zm00001d021385	up
Zm00001d026337	up
Zm00001d047501	up
Zm00001d028089	up
Zm00001d002341	up
Zm00001d003817	up
Zm00001d002602	up
Zm00001d032553	up
Zm00001d046996	up
Zm00001d050383	up
Zm00001d024752	up
Zm00001d053070	up
Zm00001d017199	up
Zm00001d002168	up
Zm00001d051556	up
Zm00001d036364	up
Zm00001d003085	up
Zm00001d042840	up
Zm00001d000399	up
Zm00001d040504	up
Zm00001d031344	up
Zm00001d010016	up
Zm00001d049544	up
Zm00001d043225	up
Zm00001d037992	up
Zm00001d042122	up
Zm00001d030678	up
Zm00001d023258	up
Zm00001d025034	up
Zm00001d014100	up
Zm00001d010340	up
Zm00001d047166	up
Zm00001d036666	up
Zm00001d017613	up
Zm00001d042685	up
Zm00001d012407	up
Zm00001d031671	up
Zm00001d016690	up
Zm00001d009979	up
Zm00001d013164	up
Zm00001d030381	up
Zm00001d017751	up
Zm00001d006193	up
Zm00001d007485	up
Zm00001d029047	up
Zm00001d010426	up
Zm00001d033917	up
Zm00001d043240	up
Zm00001d011632	up
Zm00001d009779	up
Zm00001d032353	up
Zm00001d029628	up
Zm00001d029619	up
Zm00001d037289	up
Zm00001d019697	up
Zm00001d045575	up
Zm00001d019501	up
Zm00001d007185	up
Zm00001d029762	up
Zm00001d017032	up
Zm00001d038097	up
Zm00001d009967	up
Zm00001d008846	up
Zm00001d027727	up
Zm00001d037636	up
Zm00001d004966	up
Zm00001d029546	up
Zm00001d051314	up
Zm00001d016396	up
Zm00001d053632	up
Zm00001d038181	up
Zm00001d050768	up
Zm00001d053826	up
Zm00001d053586	up
Zm00001d041476	up
Zm00001d032515	up
Zm00001d043431	up
Zm00001d050884	up
Zm00001d034411	up
Zm00001d053798	up
Zm00001d014126	up
Zm00001d042123	up
Zm00001d009690	up
Zm00001d044479	up
Zm00001d033383	up
Zm00001d033005	up
Zm00001d033061	up
Zm00001d037666	up
Zm00001d011444	up
Zm00001d010255	up
Zm00001d035243	up
Zm00001d035076	up
Zm00001d035228	up
Zm00001d050728	up
Zm00001d049239	up
Zm00001d023543	up
Zm00001d009738	up
Zm00001d043984	up
[truncated: 1,162 more rows]

## Sheet: Table S2
Table S2 GO analysis of common DEGs
GO term	Ontology	Description	Number in input list	Enrichment	FDR	up-regulated or down-regulated common DEGs
GO:0055114	P	oxidation-reduction process	237	2.13051	1.1e-22	up-regulated
GO:0044710	P	single-organism metabolic process	407	1.67622	2e-22
GO:0016491	F	oxidoreductase activity	199	2.07585	1.2e-17
GO:0044699	P	single-organism process	637	1.35394	5.9e-16
GO:0071944	C	cell periphery	222	1.82391	1.7e-14
GO:0005576	C	extracellular region	93	2.84616	1.7e-14
GO:0003824	F	catalytic activity	829	1.22965	9.2e-13
GO:0005886	C	plasma membrane	173	1.75793	1e-09
GO:0055085	P	transmembrane transport	148	1.79172	5.5e-08
GO:0044281	P	small molecule metabolic process	160	1.73784	5.6e-08
GO:0020037	F	heme binding	69	2.45459	7.5e-08
GO:0022857	F	transmembrane transporter activity	138	1.7938	8.7e-08
GO:0048046	C	apoplast	31	4.05742	1.7e-07
GO:0046906	F	tetrapyrrole binding	71	2.32686	2e-07
GO:0044711	P	single-organism biosynthetic process	138	1.69933	4.1e-06
GO:0005215	F	transporter activity	143	1.63243	7e-06
GO:0043167	F	ion binding	239	1.43047	7e-06
GO:0030312	C	external encapsulating structure	48	2.49728	7.5e-06
GO:0005618	C	cell wall	48	2.49728	7.5e-06
GO:0043169	F	cation binding	226	1.4427	8.4e-06
GO:0046872	F	metal ion binding	225	1.44074	9e-06
GO:0004497	F	monooxygenase activity	47	2.5144	1e-05
GO:0022804	F	active transmembrane transporter activity	73	2.02287	1.1e-05
GO:0071669	P	plant-type cell wall organization or biogenesis	35	3.16684	1.3e-05
GO:0006082	P	organic acid metabolic process	101	1.8373	1.3e-05
GO:0043436	P	oxoacid metabolic process	92	1.89375	1.4e-05
GO:0015291	F	secondary active transmembrane transporter activity	49	2.36047	2.6e-05
GO:0042744	P	hydrogen peroxide catabolic process	28	3.57483	2.8e-05
GO:0072593	P	reactive oxygen species metabolic process	32	3.20164	2.9e-05
GO:0042743	P	hydrogen peroxide metabolic process	28	3.51023	3.3e-05
GO:0019752	P	carboxylic acid metabolic process	88	1.84611	5.4e-05
GO:0006091	P	generation of precursor metabolites and energy	66	2.06232	5.5e-05
GO:0009832	P	plant-type cell wall biogenesis	24	3.78375	6.5e-05
GO:0016705	F	oxidoreductase activity, acting on paired donors, with incorporation or reduction of molecular oxygen	50	2.24253	7.3e-05
GO:0044262	P	cellular carbohydrate metabolic process	55	2.20537	7.6e-05
GO:0042546	P	cell wall biogenesis	30	3.1216	7.9e-05
GO:0071554	P	cell wall organization or biogenesis	55	2.17189	0.0001
GO:0009507	C	chloroplast	116	1.59658	0.00011
GO:0030054	C	cell junction	53	2.085	0.00011
GO:0055044	C	symplast	53	2.085	0.00011
GO:0005911	C	cell-cell junction	53	2.085	0.00011
GO:0009505	C	plant-type cell wall	27	3.05374	0.00011
GO:0009506	C	plasmodesma	53	2.085	0.00011
GO:0009536	C	plastid	119	1.58545	0.00011
GO:0044434	C	chloroplast part	71	1.87269	0.00011
GO:0044435	C	plastid part	72	1.86132	0.00011
GO:0005975	P	carbohydrate metabolic process	118	1.63492	0.00012
GO:0016684	F	oxidoreductase activity, acting on peroxide as acceptor	31	2.79277	0.00017
GO:0004601	F	peroxidase activity	31	2.79277	0.00017
GO:0031226	C	intrinsic component of plasma membrane	41	2.22777	0.00034
GO:0044712	P	single-organism catabolic process	60	1.99463	0.00038
GO:0009570	C	chloroplast stroma	40	2.20803	0.00051
GO:0016209	F	antioxidant activity	33	2.52482	0.00054
GO:0044724	P	single-organism carbohydrate catabolic process	26	3.00598	0.00072
GO:0098869	P	cellular oxidant detoxification	34	2.53606	0.00073
GO:1990748	P	cellular detoxification	34	2.52701	0.00075
GO:0098754	P	detoxification	34	2.51801	0.00077
GO:0009532	C	plastid stroma	40	2.15654	0.00079
GO:0022891	F	substrate-specific transmembrane transporter activity	88	1.65582	0.00088
GO:0015297	F	antiporter activity	27	2.74091	0.0009
GO:0044459	C	plasma membrane part	45	2.02701	0.00094
GO:0044264	P	cellular polysaccharide metabolic process	37	2.35472	0.0011
GO:0005506	F	iron ion binding	46	2.05869	0.0011
GO:0034219	P	carbohydrate transmembrane transport	19	3.59457	0.0013
GO:0051119	F	sugar transmembrane transporter activity	19	3.32271	0.0015
GO:0015144	F	carbohydrate transmembrane transporter activity	19	3.32271	0.0015
GO:1901476	F	carbohydrate transporter activity	19	3.32271	0.0015
GO:0009636	P	response to toxic substance	34	2.39041	0.0018
GO:0046496	P	nicotinamide nucleotide metabolic process	25	2.84298	0.0018
GO:0019362	P	pyridine nucleotide metabolic process	25	2.84298	0.0018
GO:0009808	P	lignin metabolic process	11	6.02413	0.0018
GO:0042221	P	response to chemical	111	1.54721	0.0018
GO:0015979	P	photosynthesis	30	2.52761	0.002
GO:0048037	F	cofactor binding	59	1.79245	0.0027
GO:0072524	P	pyridine-containing compound metabolic process	25	2.73824	0.0029
GO:0008643	P	carbohydrate transport	23	2.8834	0.0029
GO:0009698	P	phenylpropanoid metabolic process	14	4.22245	0.0033
GO:0009117	P	nucleotide metabolic process	47	1.97996	0.0033
GO:0005887	C	integral component of plasma membrane	24	2.54824	0.0035
GO:0005507	F	copper ion binding	15	3.67247	0.0036
GO:0016616	F	oxidoreductase activity, acting on the CH-OH group of donors, NAD or NADP as acceptor	28	2.39793	0.0038
GO:0005200	F	structural constituent of cytoskeleton	12	4.45942	0.0038
GO:0046914	F	transition metal ion binding	100	1.50911	0.0045
GO:0055086	P	nucleobase-containing small molecule metabolic process	52	1.87224	0.0048
GO:0071555	P	cell wall organization	37	2.14483	0.0049
GO:0045229	P	external encapsulating structure organization	38	2.10881	0.0052
GO:0006753	P	nucleoside phosphate metabolic process	47	1.92919	0.0053
GO:0005976	P	polysaccharide metabolic process	46	1.93392	0.0057
GO:0016052	P	carbohydrate catabolic process	33	2.22971	0.0057
GO:0072350	P	tricarboxylic acid metabolic process	9	6.24319	0.006
GO:0006733	P	oxidoreduction coenzyme metabolic process	25	2.56289	0.006
GO:0019748	P	secondary metabolic process	16	3.39766	0.0072
GO:0015149	F	hexose transmembrane transporter activity	13	3.75748	0.0072
GO:0005355	F	glucose transmembrane transporter activity	13	3.75748	0.0072
GO:0016614	F	oxidoreductase activity, acting on CH-OH group of donors	32	2.14129	0.0072
GO:0015145	F	monosaccharide transmembrane transporter activity	13	3.75748	0.0072
GO:0009526	C	plastid envelope	30	2.13808	0.0084
GO:0016798	F	hydrolase activity, acting on glycosyl bonds	46	1.82689	0.009
GO:0006073	P	cellular glucan metabolic process	30	2.25386	0.0095
GO:0050662	F	coenzyme binding	41	1.88769	0.01
GO:0042555	C	MCM complex	6	8.32426	0.011
GO:0009834	P	plant-type secondary cell wall biogenesis	12	4.0939	0.012
GO:1904659	P	glucose transmembrane transport	13	3.75748	0.012
GO:0035428	P	hexose transmembrane transport	13	3.75748	0.012
GO:0008645	P	hexose transport	13	3.75748	0.012
GO:0015758	P	glucose transport	13	3.75748	0.012
GO:0015749	P	monosaccharide transport	13	3.75748	0.012
GO:0044042	P	glucan metabolic process	30	2.19059	0.013
GO:0006108	P	malate metabolic process	8	6.16612	0.014
GO:0016746	F	transferase activity, transferring acyl groups	52	1.71227	0.014
GO:0016682	F	oxidoreductase activity, acting on diphenols and related substances as donors, oxygen as acceptor	8	5.5495	0.014
GO:0015980	P	energy derivation by oxidation of organic compounds	23	2.46724	0.015
GO:0032787	P	monocarboxylic acid metabolic process	42	1.88372	0.015
GO:0035251	F	UDP-glucosyltransferase activity	24	2.31229	0.015
GO:0006090	P	pyruvate metabolic process	19	2.74585	0.016
GO:0044763	P	single-organism cellular process	385	1.18277	0.016
GO:0033692	P	cellular polysaccharide biosynthetic process	26	2.30245	0.016
GO:0006979	P	response to oxidative stress	34	2.03322	0.016
GO:0016709	F	oxidoreductase activity, acting on paired donors, with incorporation or reduction of molecular oxygen, NAD(P)H as one donor, and incorporation of one atom of oxygen	24	2.27025	0.018
GO:0004553	F	hydrolase activity, hydrolyzing O-glycosyl compounds	41	1.81927	0.018
GO:0005996	P	monosaccharide metabolic process	24	2.35592	0.019
GO:0042440	P	pigment metabolic process	16	2.97295	0.021
GO:0006002	P	fructose 6-phosphate metabolic process	7	6.62157	0.021
GO:0006099	P	tricarboxylic acid cycle	13	3.42454	0.022
GO:0046148	P	pigment biosynthetic process	14	3.23721	0.022
GO:0016866	F	intramolecular transferase activity	14	3.03489	0.022
GO:0090484	F	drug transporter activity	11	3.6336	0.022
GO:0016868	F	intramolecular transferase activity, phosphotransferases	7	5.82698	0.022
GO:0015238	F	drug transmembrane transporter activity	11	3.6336	0.022
GO:0009941	C	chloroplast envelope	28	2.05175	0.022
GO:0006006	P	glucose metabolic process	13	3.38173	0.024
GO:0022892	F	substrate-specific transporter activity	90	1.44407	0.024
GO:0009699	P	phenylpropanoid biosynthetic process	9	4.68239	0.025
GO:0019318	P	hexose metabolic process	21	2.45519	0.025
GO:0044550	P	secondary metabolite biosynthetic process	10	4.16213	0.026
GO:0010383	P	cell wall polysaccharide metabolic process	19	2.58433	0.026
GO:0046527	F	glucosyltransferase activity	24	2.16214	0.029
GO:0034637	P	cellular carbohydrate biosynthetic process	29	2.06681	0.03
GO:0019320	P	hexose catabolic process	8	5.045	0.031
GO:0042493	P	response to drug	11	3.69221	0.031
GO:0006855	P	drug transmembrane transport	11	3.69221	0.031
GO:0015893	P	drug transport	11	3.69221	0.031
GO:0016747	F	transferase activity, transferring acyl groups other than amino-acyl groups	45	1.69652	0.032
GO:0005351	F	sugar:proton symporter activity	13	3.00598	0.032
GO:0005402	F	cation:sugar symporter activity	13	3.00598	0.032
GO:0080044	F	quercetin 7-O-glucosyltransferase activity	13	2.97295	0.034
GO:0030060	F	L-malate dehydrogenase activity	5	8.00409	0.035
GO:0080043	F	quercetin 3-O-glucosyltransferase activity	13	2.94063	0.035
GO:0016730	F	oxidoreductase activity, acting on iron-sulfur proteins as donors	5	8.00409	0.035
GO:0008146	F	sulfotransferase activity	5	8.00409	0.035
GO:0016615	F	malate dehydrogenase activity	7	5.02326	0.036
GO:0044723	P	single-organism carbohydrate metabolic process	69	1.53576	0.038
GO:0030244	P	cellulose biosynthetic process	12	3.3297	0.039
GO:0009833	P	plant-type primary cell wall biogenesis	9	4.25672	0.04
GO:0016760	F	cellulose synthase (UDP-forming) activity	9	3.82236	0.04
GO:0046394	P	carboxylic acid biosynthetic process	38	1.81377	0.041
GO:0016759	F	cellulose synthase activity	9	3.74592	0.044
GO:0000271	P	polysaccharide biosynthetic process	26	2.08106	0.046
GO:0009809	P	lignin biosynthetic process	6	6.57178	0.046
GO:0015706	P	nitrate transport	6	6.57178	0.046
GO:0030243	P	cellulose metabolic process	14	2.88464	0.048
GO:0006165	P	nucleoside diphosphate phosphorylation	16	2.64262	0.049
GO:0044036	P	cell wall macromolecule metabolic process	21	2.27616	0.049
GO:0043648	P	dicarboxylic acid metabolic process	15	2.73824	0.049
GO:0009408	P	response to heat	33	5.92967	4.7e-11	down-regulated
GO:0001071	F	nucleic acid binding transcription factor activity	94	2.20855	3.2e-09
GO:0003700	F	transcription factor activity, sequence-specific DNA binding	94	2.20855	3.2e-09
GO:0009266	P	response to temperature stimulus	36	4.18101	1.5e-08
GO:0006355	P	regulation of transcription, DNA-templated	154	1.69484	3.1e-07
GO:2001141	P	regulation of RNA biosynthetic process	154	1.67996	3.4e-07
GO:1903506	P	regulation of nucleic acid-templated transcription	154	1.67996	3.4e-07
GO:0051252	P	regulation of RNA metabolic process	156	1.65871	5e-07
GO:0006351	P	transcription, DNA-templated	159	1.61833	1.5e-06
GO:0032774	P	RNA biosynthetic process	160	1.60902	1.7e-06
GO:0019219	P	regulation of nucleobase-containing compound metabolic process	156	1.6125	1.9e-06
GO:0097659	P	nucleic acid-templated transcription	159	1.60575	1.9e-06
GO:2000112	P	regulation of cellular macromolecule biosynthetic process	158	1.59904	2.3e-06
GO:0034605	P	cellular response to heat	17	6.47591	2.8e-06
GO:0010468	P	regulation of gene expression	165	1.57084	2.8e-06
GO:0010556	P	regulation of macromolecule biosynthetic process	158	1.58334	3.4e-06
GO:0031326	P	regulation of cellular biosynthetic process	158	1.57231	4.9e-06
GO:0009889	P	regulation of biosynthetic process	158	1.57067	4.9e-06
GO:0051171	P	regulation of nitrogen compound metabolic process	160	1.54643	9.8e-06
GO:0061408	P	positive regulation of transcription from RNA polymerase II promoter in response to heat stress	11	10.4757	1.3e-05
GO:0036003	P	positive regulation of transcription from RNA polymerase II promoter in response to stress	11	10.4757	1.3e-05
GO:0043618	P	regulation of transcription from RNA polymerase II promoter in response to stress	11	9.82101	2.2e-05
GO:0043620	P	regulation of DNA-templated transcription in response to stress	11	9.5234	2.7e-05
GO:0080090	P	regulation of primary metabolic process	173	1.46753	5.6e-05
GO:0060255	P	regulation of macromolecule metabolic process	177	1.45231	7.2e-05
GO:0031323	P	regulation of cellular metabolic process	173	1.45201	9.7e-05
GO:0034654	P	nucleobase-containing compound biosynthetic process	164	1.45921	0.00015
GO:0018130	P	heterocycle biosynthetic process	169	1.42767	0.00033
GO:0019222	P	regulation of metabolic process	177	1.41176	0.00034
GO:0000978	F	RNA polymerase II core promoter proximal region sequence-specific DNA binding	11	7.48267	0.00047
GO:0050789	P	regulation of biological process	244	1.31357	0.00056
GO:0003677	F	DNA binding	149	1.45438	0.0007
GO:0001159	F	core promoter proximal region DNA binding	11	6.68664	0.0007
GO:0000987	F	core promoter proximal region sequence-specific DNA binding	11	6.68664	0.0007
GO:0015035	F	protein disulfide oxidoreductase activity	17	4.014	0.0007
GO:0043565	F	sequence-specific DNA binding	68	1.80891	0.00071
GO:0019438	P	aromatic compound biosynthetic process	169	1.39953	0.00086
GO:0045454	P	cell redox homeostasis	22	3.12709	0.00086
GO:0000977	F	RNA polymerase II regulatory region sequence-specific DNA binding	17	3.79448	0.00096
GO:0015036	F	disulfide oxidoreductase activity	17	3.82436	0.00096
GO:0042542	P	response to hydrogen peroxide	10	6.49323	0.0012
GO:0050794	P	regulation of cellular process	229	1.31088	0.0012
GO:0001012	F	RNA polymerase II regulatory region DNA binding	17	3.6795	0.0013
GO:1901362	P	organic cyclic compound biosynthetic process	171	1.37426	0.0018
GO:0004842	F	ubiquitin-protein transferase activity	45	2.00571	0.0019
GO:0016667	F	oxidoreductase activity, acting on a sulfur group of donors	18	3.33938	0.002
GO:0003839	F	gamma-glutamylcyclotransferase activity	6	13.1863	0.0021
GO:0000976	F	transcription regulatory region sequence-specific DNA binding	18	3.27557	0.0021
GO:0001067	F	regulatory region nucleic acid binding	33	2.22888	0.0023
GO:0044212	F	transcription regulatory region DNA binding	33	2.22888	0.0023
GO:0000975	F	regulatory region DNA binding	33	2.22888	0.0023
GO:0019787	F	ubiquitin-like protein transferase activity	45	1.95686	0.0023
GO:0006751	P	glutathione catabolic process	6	10.7138	0.0065
GO:0009312	P	oligosaccharide biosynthetic process	11	4.62165	0.0065
GO:0016567	P	protein ubiquitination	47	1.85983	0.0073
GO:0031072	F	heat shock protein binding	11	4.24692	0.0074
GO:0009628	P	response to abiotic stimulus	48	1.84077	0.0075
GO:0044273	P	sulfur compound catabolic process	6	10.0836	0.0078
GO:1990837	F	sequence-specific double-stranded DNA binding	20	2.64539	0.0088
GO:0016755	F	transferase activity, transferring amino-acyl groups	6	8.57106	0.0094
GO:0006457	P	protein folding	27	2.29582	0.011
GO:0042219	P	cellular modified amino acid catabolic process	6	9.02217	0.012
GO:0065007	P	biological regulation	268	1.22627	0.014
GO:0051082	F	unfolded protein binding	21	2.43892	0.015
GO:0032446	P	protein modification by small protein conjugation	47	1.77619	0.017
GO:0004805	F	trehalose-phosphatase activity	7	5.8821	0.019
GO:0006020	P	inositol metabolic process	6	7.14255	0.033
GO:0051087	F	chaperone binding	10	3.66285	0.034
GO:0005992	P	trehalose biosynthetic process	7	5.55532	0.041
GO:0009311	P	oligosaccharide metabolic process	13	3.06953	0.045
GO:0005991	P	trehalose metabolic process	7	5.40517	0.045
GO:0006749	P	glutathione metabolic process	11	3.45354	0.047
GO:1901565	P	organonitrogen compound catabolic process	18	2.48437	0.047

## Sheet: Table S3
Table S3 Specially expressed DEGs in RILpur-W22 seedlings under non-treated and salt-treated
geneID	log2FoldChange	up or down	annotation
Zm00001d001016	-5.88288	down	#N/A
ENSRNA049478739	-5.77789	down	#N/A
Zm00001d031771	-5.21403	down	Class I glutamine amidotransferase-like superfamily protein
ENSRNA049478806	-4.99014	down	#N/A
Zm00001d027047	-4.96865	down	#N/A
Zm00001d037212	-4.83386	down	AGAMOUS-like 66
Zm00001d007247	-4.83352	down	receptor like protein 14
ENSRNA049478122	-4.82487	down	#N/A
Zm00001d022501	-4.64185	down	beta-amylase 3
Zm00001d052926	-4.63779	down	#N/A
Zm00001d024541	-4.51675	down	FAD-binding Berberine family protein
ENSRNA049477082	-4.45328	down	#N/A
Zm00001d020878	-4.43897	down	NA
Zm00001d037054	-4.35578	down	WRKY family transcription factor
Zm00001d050649	-4.3387	down	centroradialis
Zm00001d038965	-4.2245	down	purine permease 4
Zm00001d043894	-4.18729	down	#N/A
Zm00001d044466	-4.14589	down	NA
ENSRNA049478813	-4.14032	down	#N/A
Zm00001d000296	-4.1052	down	#N/A
ENSRNA049479581	-3.98358	down	#N/A
Zm00001d026456	-3.95621	down	CYCLIN D4;1
Zm00001d031704	-3.91726	down	H(+)-ATPase 5
Zm00001d004292	-3.89776	down	#N/A
ENSRNA049478703	-3.77758	down	#N/A
Zm00001d025650	-3.64034	down	RNA-binding (RRM/RBD/RNP motifs) family protein
Zm00001d036755	-3.60982	down	SNF7 family protein
Zm00001d045070	-3.56295	down	Protein kinase superfamily protein
Zm00001d038075	-3.46979	down	NA
ENSRNA049479266	-3.39318	down	#N/A
ENSRNA049477405	-3.37945	down	#N/A
Zm00001d039244	-3.27802	down	#N/A
Zm00001d008080	-3.27498	down	#N/A
Zm00001d023025	-3.22001	down	#N/A
Zm00001d016478	-3.09159	down	thioredoxin family protein
ENSRNA049479918	-3.08647	down	#N/A
ENSRNA049478662	-3.06525	down	#N/A
ENSRNA049478162	-3.05059	down	#N/A
Zm00001d050422	-2.97792	down	SOS3-interacting protein 3
Zm00001d045071	-2.96875	down	Protein kinase superfamily protein
Zm00001d021226	-2.82026	down	Bifunctional inhibitor/lipid-transfer protein/seed storage 2S albumin superfamily protein
Zm00001d033447	-2.79687	down	cupin family protein
Zm00001d014874	-2.69307	down	Seven transmembrane MLO family protein
Zm00001d042920	-2.65656	down	WUSCHEL related homeobox 2
Zm00001d023704	-2.64472	down	#N/A
Zm00001d046314	-2.63331	down	NA
ENSRNA049479633	-2.62369	down	#N/A
Zm00001d032937	-2.59909	down	Protein of unknown function (DUF581)
Zm00001d001927	-2.54763	down	KAR-UP oxidoreductase 1
Zm00001d052863	-2.52622	down	#N/A
Zm00001d053843	-2.51316	down	Wound-responsive family protein
Zm00001d033284	-2.49705	down	#N/A
Zm00001d008589	-2.49432	down	#N/A
Zm00001d044770	-2.47907	down	#N/A
Zm00001d027434	-2.47048	down	Alpha/beta hydrolase related protein
Zm00001d022795	-2.43286	down	#N/A
Zm00001d008898	-2.4232	down	Peroxidase superfamily protein
Zm00001d044401	-2.40292	down	#N/A
Zm00001d014875	-2.38644	down	Stabilizer of iron transporter SufD / Polynucleotidyl transferase
Zm00001d034483	-2.38099	down	#N/A
Zm00001d009103	-2.38081	down	NA
Zm00001d002393	-2.35789	down	NA
Zm00001d025204	-2.34602	down	FAD/NAD(P)-binding oxidoreductase family protein
Zm00001d022217	-2.33228	down	NA
Zm00001d025360	-2.31218	down	F-box family protein
Zm00001d008431	-2.28885	down	#N/A
Zm00001d001231	-2.27366	down	#N/A
Zm00001d001513	-2.26679	down	#N/A
Zm00001d042900	-2.25978	down	ROTUNDIFOLIA like 8
Zm00001d009160	-2.24955	down	sequence-specific DNA binding transcription factors
Zm00001d049630	-2.22249	down	Galactose oxidase/kelch repeat superfamily protein
Zm00001d016924	-2.21676	down	Ethylene insensitive 3 family protein
Zm00001d048538	-2.21041	down	DNAJ homologue 3
Zm00001d008271	-2.21024	down	Aldolase superfamily protein
Zm00001d025281	-2.20007	down	NA
Zm00001d000808	-2.19931	down	#N/A
ENSRNA049474524	-2.18533	down	#N/A
Zm00001d053757	-2.16657	down	Galactose mutarotase-like superfamily protein
Zm00001d008664	-2.16445	down	annexin 8
Zm00001d000304	-2.15987	down	Plant calmodulin-binding protein-related
Zm00001d017033	-2.15605	down	NA
Zm00001d037566	-2.15541	down	#N/A
ENSRNA049479090	-2.14661	down	#N/A
Zm00001d005392	-2.13258	down	alpha/beta-Hydrolases superfamily protein
Zm00001d010800	-2.1258	down	Late embryogenesis abundant (LEA) hydroxyproline-rich glycoprotein family
Zm00001d039057	-2.124	down	Protein of unknown function (DUF1645)
Zm00001d053213	-2.07361	down	#N/A
Zm00001d043453	-2.06334	down	early nodulin-like protein 4
Zm00001d012910	-2.04673	down	#N/A
Zm00001d052179	-2.03863	down	Protein of unknown function (DUF1645)
Zm00001d049561	-2.02594	down	NA
Zm00001d039923	-2.01637	down	Protein kinase superfamily protein
Zm00001d002213	-2.01158	down	Late embryogenesis abundant (LEA) hydroxyproline-rich glycoprotein family
Zm00001d033657	-2.00523	down	histone acetyltransferase of the GNAT family 2
Zm00001d025373	-2.00486	down	Aluminium activated malate transporter family protein
Zm00001d043877	-1.98633	down	NAC 007
Zm00001d031188	-1.9856	down	calmodulin-domain protein kinase 7
Zm00001d034069	-1.967	down	UDP-Glycosyltransferase superfamily protein
Zm00001d020630	-1.96565	down	NA
Zm00001d010010	-1.9542	down	NA
Zm00001d026271	-1.94952	down	ethylene responsive element binding factor 4
Zm00001d039099	-1.94738	down	#N/A
Zm00001d038873	-1.92356	down	#N/A
Zm00001d043190	-1.90019	down	F-box family protein
Zm00001d034219	-1.89756	down	NA
Zm00001d013178	-1.88138	down	NA
Zm00001d031728	-1.87266	down	C-repeat-binding factor 4
Zm00001d039384	-1.87259	down	#N/A
Zm00001d037197	-1.86704	down	#N/A
ENSRNA049476719	-1.86489	down	#N/A
Zm00001d033068	-1.86374	down	high affinity K+ transporter 5
Zm00001d038511	-1.86212	down	cytochrome P450, family 714, subfamily A, polypeptide 1
Zm00001d024705	-1.8555	down	Ca(2)-dependent phospholipid-binding protein (Copine) family
Zm00001d041221	-1.85349	down	Core-2/I-branching beta-1,6-N-acetylglucosaminyltransferase family protein
Zm00001d023037	-1.84843	down	#N/A
Zm00001d025490	-1.84322	down	NA
Zm00001d011889	-1.82259	down	hexokinase-like 1
Zm00001d021957	-1.8145	down	NA
Zm00001d046934	-1.8086	down	NA
Zm00001d026432	-1.80794	down	NA
Zm00001d019216	-1.80391	down	cytokinin response factor 4
Zm00001d004895	-1.79537	down	F-box family protein
Zm00001d010396	-1.78879	down	NA
Zm00001d037032	-1.78781	down	TRICHOME BIREFRINGENCE-LIKE 38
Zm00001d010162	-1.77883	down	histone deacetylase 8
Zm00001d020834	-1.77806	down	basic helix-loop-helix (bHLH) DNA-binding superfamily protein
Zm00001d011843	-1.77722	down	NA
Zm00001d029919	-1.77225	down	Polynucleotidyl transferase, ribonuclease H-like superfamily protein
Zm00001d000408	-1.77007	down	EIN3-binding F box protein 1
Zm00001d034130	-1.76904	down	NA
Zm00001d016718	-1.75664	down	#N/A
Zm00001d029136	-1.74895	down	Patatin-like phospholipase family protein
Zm00001d041455	-1.74873	down	homocysteine methyltransferase 2
Zm00001d044291	-1.74498	down	Hydroxyproline-rich glycoprotein family protein
Zm00001d039942	-1.73263	down	HSP20-like chaperones superfamily protein
Zm00001d012527	-1.73127	down	NAC (No Apical Meristem) domain transcriptional regulator superfamily protein
Zm00001d054043	-1.73018	down	Heat shock protein 70 (Hsp 70) family protein
Zm00001d032479	-1.72946	down	Arabidopsis protein of unknown function (DUF241)
Zm00001d011486	-1.72549	down	CTP synthase family protein
Zm00001d030345	-1.72397	down	#N/A
Zm00001d047820	-1.72352	down	ROTUNDIFOLIA like 8
Zm00001d027386	-1.71773	down	phospholipase D beta 1
Zm00001d021949	-1.71472	down	Phototropic-responsive NPH3 family protein
Zm00001d013387	-1.71141	down	#N/A
Zm00001d029583	-1.70444	down	polygalacturonase inhibiting protein 1
Zm00001d038296	-1.69976	down	bZIP transcription factor family protein
Zm00001d003508	-1.69898	down	NA
Zm00001d033227	-1.6975	down	NA
Zm00001d007420	-1.6921	down	NA
Zm00001d002285	-1.68805	down	NAC (No Apical Meristem) domain transcriptional regulator superfamily protein
Zm00001d023785	-1.68767	down	NA
Zm00001d032081	-1.68734	down	Dormancy/auxin associated family protein
Zm00001d012528	-1.68588	down	Tetratricopeptide repeat (TPR)-like superfamily protein
Zm00001d007280	-1.6858	down	NA
Zm00001d015010	-1.68564	down	Plant protein of unknown function (DUF828)
Zm00001d042609	-1.67319	down	NAC (No Apical Meristem) domain transcriptional regulator superfamily protein
Zm00001d027387	-1.6702	down	Subtilase family protein
Zm00001d020973	-1.66672	down	DNAJ heat shock N-terminal domain-containing protein
Zm00001d003463	-1.66611	down	NA
Zm00001d028598	-1.66506	down	ROTUNDIFOLIA like 8
Zm00001d016103	-1.6619	down	#N/A
Zm00001d017381	-1.65839	down	NAD(P)-binding Rossmann-fold superfamily protein
Zm00001d043491	-1.65624	down	ethylene responsive element binding factor 1
Zm00001d001823	-1.65497	down	#N/A
Zm00001d031266	-1.65423	down	Alcohol dehydrogenase transcription factor Myb/SANT-like family protein
Zm00001d039095	-1.64913	down	#N/A
Zm00001d011968	-1.64809	down	NA
Zm00001d015491	-1.64557	down	heptahelical protein 3
Zm00001d011887	-1.64334	down	high chlorophyll fluorescence 153
Zm00001d033313	-1.64188	down	AP2/B3-like transcriptional factor family protein
Zm00001d052253	-1.63883	down	Galactose oxidase/kelch repeat superfamily protein
Zm00001d048559	-1.63837	down	glutathione S-transferase TAU 18
Zm00001d046192	-1.63754	down	NA
Zm00001d049834	-1.63543	down	glycosylphosphatidylinositol-anchored lipid protein transfer 1
Zm00001d030930	-1.63486	down	#N/A
Zm00001d009540	-1.6337	down	NA
Zm00001d028074	-1.63352	down	Acyl-CoA N-acyltransferases (NAT) superfamily protein
Zm00001d008841	-1.63236	down	17.6 kDa class II heat shock protein
Zm00001d035132	-1.63226	down	S-adenosyl-L-methionine-dependent methyltransferases superfamily protein
Zm00001d046846	-1.6303	down	RING/U-box superfamily protein
Zm00001d001432	-1.62666	down	#N/A
Zm00001d029673	-1.62222	down	phloem protein 2-A13
Zm00001d037025	-1.62139	down	GDSL-like Lipase/Acylhydrolase superfamily protein
Zm00001d053369	-1.61395	down	WRKY family transcription factor
Zm00001d042756	-1.6137	down	Duplicated homeodomain-like superfamily protein
Zm00001d031423	-1.61159	down	A20/AN1-like zinc finger family protein
Zm00001d036768	-1.6032	down	myb domain protein 70
Zm00001d017240	-1.5963	down	Glutaredoxin family protein
Zm00001d033782	-1.59219	down	NA
Zm00001d030856	-1.58996	down	#N/A
Zm00001d044171	-1.5882	down	WRKY family transcription factor
Zm00001d038853	-1.58788	down	Protein of unknown function (DUF1230)
Zm00001d036539	-1.58773	down	Barwin-related endoglucanase
Zm00001d025983	-1.58767	down	cationic amino acid transporter 6
Zm00001d016911	-1.58736	down	C2H2 and C2HC zinc fingers superfamily protein
Zm00001d021185	-1.58479	down	bromodomain and extraterminal domain protein 10
Zm00001d043686	-1.5797	down	Survival protein SurE-like phosphatase/nucleotidase
Zm00001d012456	-1.57777	down	2-oxoglutarate (2OG) and Fe(II)-dependent oxygenase superfamily protein
Zm00001d034011	-1.57725	down	NA
Zm00001d000222	-1.57415	down	Nodulin MtN3 family protein
Zm00001d044934	-1.57329	down	fucosyltransferase 1
Zm00001d016483	-1.57214	down	MAC/Perforin domain-containing protein
Zm00001d036452	-1.57065	down	Bifunctional inhibitor/lipid-transfer protein/seed storage 2S albumin superfamily protein
Zm00001d044075	-1.57048	down	NA
Zm00001d036925	-1.56674	down	Galactose oxidase/kelch repeat superfamily protein
Zm00001d049384	-1.5647	down	#N/A
Zm00001d017079	-1.56064	down	Phototropic-responsive NPH3 family protein
Zm00001d052874	-1.5604	down	NA
Zm00001d008535	-1.55713	down	Protein of unknown function (DUF1666)
Zm00001d000544	-1.55674	down	#N/A
Zm00001d016230	-1.55663	down	endoplasmic reticulum-adenine nucleotide transporter 1
Zm00001d041608	-1.55165	down	Arabidopsis Inositol phosphorylceramide synthase 1
Zm00001d009118	-1.54518	down	Adenine nucleotide alpha hydrolases-like superfamily protein
Zm00001d047399	-1.54284	down	O-Glycosyl hydrolases family 17 protein
Zm00001d020136	-1.53882	down	WRKY DNA-binding protein 30
Zm00001d040050	-1.53788	down	NA
Zm00001d034365	-1.53716	down	syntaxin of plants 121
Zm00001d012563	-1.53695	down	NA
Zm00001d043737	-1.53456	down	AWPM-19-like family protein
Zm00001d029823	-1.53327	down	RING/U-box superfamily protein
Zm00001d006666	-1.53258	down	#N/A
Zm00001d019861	-1.52916	down	NA
Zm00001d042288	-1.52727	down	#N/A
Zm00001d033605	-1.52523	down	lysine decarboxylase family protein
Zm00001d011473	-1.52513	down	K+ transporter 1
Zm00001d042054	-1.52207	down	ARM repeat superfamily protein
Zm00001d004936	-1.5211	down	#N/A
Zm00001d010795	-1.51956	down	IQ-domain 26
Zm00001d021627	-1.51878	down	Protein of unknown function, DUF584
Zm00001d051525	-1.51777	down	oligopeptide transporter 4
Zm00001d045703	-1.51756	down	NHL domain-containing protein
Zm00001d027404	-1.51524	down	NA
Zm00001d032938	-1.51452	down	Protein of unknown function (DUF1677)
Zm00001d007885	-1.51264	down	Glutaredoxin family protein
Zm00001d017699	-1.51239	down	xyloglucan endotransglucosylase/hydrolase 30
Zm00001d046332	-1.5089	down	basic helix-loop-helix (bHLH) DNA-binding superfamily protein
Zm00001d006034	-1.50331	down	AT hook motif DNA-binding family protein
Zm00001d005698	-1.50315	down	zinc finger (AN1-like) family protein
Zm00001d016648	-1.49991	down	#N/A
Zm00001d019078	-1.49923	down	P-loop containing nucleoside triphosphate hydrolases superfamily protein
Zm00001d051919	-1.49837	down	#N/A
Zm00001d002287	-1.49831	down	Leucine-rich receptor-like protein kinase family protein
Zm00001d031194	-1.49795	down	basic leucine-zipper 5
Zm00001d021840	-1.49785	down	Putative methyltransferase family protein
Zm00001d043795	-1.49723	down	glutathione S-transferase TAU 18
Zm00001d010048	-1.49169	down	Integrase-type DNA-binding superfamily protein
Zm00001d023384	-1.49156	down	PHYTOSULFOKINE 3 PRECURSOR
Zm00001d010520	-1.49155	down	glycerol-3-phosphate acyltransferase 5
Zm00001d026212	-1.48961	down	Protein of unknown function (DUF59)
Zm00001d034641	-1.48723	down	C2H2-type zinc finger family protein
Zm00001d044874	-1.48356	down	HSP20-like chaperones superfamily protein
Zm00001d023620	-1.48035	down	NA
Zm00001d041530	-1.47757	down	TBP-associated factor 8
Zm00001d034109	-1.47708	down	Protein phosphatase 2C family protein
Zm00001d018964	-1.47673	down	Guanylate-binding family protein
Zm00001d026404	-1.47662	down	#N/A
Zm00001d019225	-1.47475	down	aromatic and neutral transporter 1
Zm00001d015033	-1.47452	down	phospholipase D delta
Zm00001d043066	-1.47401	down	WRKY DNA-binding protein 64
Zm00001d037188	-1.47345	down	Protein kinase superfamily protein
Zm00001d050899	-1.47188	down	PLANT CADMIUM RESISTANCE 2
Zm00001d006883	-1.47032	down	Protein of unknown function (DUF1645)
Zm00001d030663	-1.46978	down	DNAJ heat shock N-terminal domain-containing protein
Zm00001d047492	-1.46938	down	Heavy metal transport/detoxification superfamily protein
Zm00001d003346	-1.46903	down	#N/A
Zm00001d032849	-1.46874	down	RING/U-box superfamily protein
Zm00001d046667	-1.46541	down	#N/A
Zm00001d006256	-1.46536	down	NA
Zm00001d053215	-1.46317	down	Pathogenesis-related thaumatin superfamily protein
Zm00001d027703	-1.46281	down	#N/A
Zm00001d029495	-1.45852	down	Calcium-binding EF-hand family protein
Zm00001d033592	-1.45747	down	cytochrome P450, family 71, subfamily B, polypeptide 37
Zm00001d051795	-1.45114	down	Calcium-binding EF-hand family protein
Zm00001d013220	-1.44922	down	Protein phosphatase 2C family protein
Zm00001d038695	-1.44683	down	Arabidopsis thaliana gibberellin 2-oxidase 1
Zm00001d024406	-1.4425	down	RING/U-box superfamily protein
Zm00001d029848	-1.44124	down	branched-chain amino acid aminotransferase 5 / branched-chain amino acid transaminase 5 (BCAT5)
Zm00001d047663	-1.4411	down	acyl-activating enzyme 7
Zm00001d015091	-1.44063	down	BAX inhibitor 1
Zm00001d022506	-1.43952	down	NAD(P)-binding Rossmann-fold superfamily protein
Zm00001d048669	-1.43892	down	beta-xylosidase 2
Zm00001d004086	-1.43747	down	WRKY DNA-binding protein 11
Zm00001d053750	-1.43663	down	NA
Zm00001d016907	-1.43653	down	purple acid phosphatase 3
Zm00001d010751	-1.43421	down	LOB domain-containing protein 41
Zm00001d034526	-1.42899	down	NA
Zm00001d047888	-1.42787	down	LYR family of Fe/S cluster biogenesis protein
Zm00001d027520	-1.42612	down	expansin-like A1
Zm00001d030086	-1.42358	down	NA
Zm00001d044036	-1.42295	down	NA
Zm00001d013430	-1.42253	down	receptor-like kinase 1
Zm00001d046289	-1.42135	down	SWIM zinc finger family protein / mitogen-activated protein kinase kinase kinase (MAPKKK)-related
Zm00001d014993	-1.42003	down	Heat shock protein 70 (Hsp 70) family protein
Zm00001d035139	-1.41931	down	NA
Zm00001d004022	-1.41461	down	RPM1 interacting protein 4
Zm00001d053887	-1.41442	down	molybdopterin biosynthesis MoaE family protein
Zm00001d051056	-1.41427	down	Adenosylmethionine decarboxylase family protein
ZemaCp032	-1.41389	down	#N/A
Zm00001d023112	-1.41355	down	#N/A
Zm00001d029699	-1.40649	down	glutathione S-transferase TAU 18
Zm00001d002823	-1.40251	down	stress-inducible protein, putative
Zm00001d013619	-1.40098	down	#N/A
Zm00001d043422	-1.3985	down	RING/U-box superfamily protein
Zm00001d005897	-1.39828	down	NA
Zm00001d051936	-1.39676	down	F-box family protein
Zm00001d025645	-1.39575	down	NA
Zm00001d011076	-1.39535	down	zinc finger (C3HC4-type RING finger) family protein
Zm00001d039712	-1.39513	down	Kinase interacting (KIP1-like) family protein
Zm00001d041550	-1.39508	down	heat shock protein 70
Zm00001d040958	-1.39355	down	#N/A
Zm00001d034066	-1.38923	down	UDP-Glycosyltransferase superfamily protein
Zm00001d024770	-1.3874	down	Thioesterase superfamily protein
Zm00001d048286	-1.3867	down	Acyl-CoA N-acyltransferases (NAT) superfamily protein
Zm00001d017780	-1.38577	down	ARM repeat superfamily protein
Zm00001d030124	-1.38551	down	NA
Zm00001d015627	-1.38496	down	Ubiquitin-like superfamily protein
Zm00001d034112	-1.384	down	Subtilase family protein
Zm00001d006525	-1.38327	down	Eukaryotic aspartyl protease family protein
Zm00001d033481	-1.37962	down	#N/A
Zm00001d000170	-1.37629	down	sensitivity to red light reduced protein (SRR1)
Zm00001d050988	-1.37517	down	Ubiquitin-like superfamily protein
Zm00001d034760	-1.37492	down	ferredoxin 3
Zm00001d002456	-1.37385	down	Protein of unknown function (DUF59)
Zm00001d016471	-1.37364	down	cinnamate-4-hydroxylase
Zm00001d047969	-1.37183	down	Protein of unknown function (DUF1423)
Zm00001d017777	-1.37134	down	Adenine nucleotide alpha hydrolases-like superfamily protein
Zm00001d007083	-1.36809	down	NA
Zm00001d016607	-1.36411	down	NA
Zm00001d033846	-1.36295	down	NA
Zm00001d012700	-1.36276	down	NA
Zm00001d042876	-1.36248	down	#N/A
Zm00001d002399	-1.36223	down	#N/A
Zm00001d026269	-1.36002	down	Protein phosphatase 2C family protein
Zm00001d031725	-1.35788	down	TCP family transcription factor
Zm00001d021929	-1.35771	down	geranylgeranyl pyrophosphate synthase 1
Zm00001d039073	-1.3574	down	NA
ENSRNA049463813	-1.35727	down	#N/A
Zm00001d017462	-1.35449	down	ethylene responsive element binding factor 1
Zm00001d039510	-1.3525	down	IQ-domain 26
Zm00001d023366	-1.35081	down	Methyltransferase-related protein
Zm00001d003604	-1.34894	down	#N/A
Zm00001d018350	-1.3486	down	UDP-D-glucuronate 4-epimerase 1
Zm00001d020071	-1.3481	down	sugar transporter 14
Zm00001d006699	-1.34709	down	NA
Zm00001d006489	-1.34598	down	Protein of unknown function, DUF584
Zm00001d027585	-1.34587	down	inhibitor/interactor with cyclin-dependent kinase
Zm00001d039931	-1.34568	down	Protein kinase superfamily protein
Zm00001d027731	-1.34292	down	evolutionarily conserved C-terminal region 2
Zm00001d002405	-1.33971	down	WRKY DNA-binding protein 11
Zm00001d014153	-1.33932	down	#N/A
Zm00001d010399	-1.33914	down	WRKY DNA-binding protein 33
Zm00001d026406	-1.33871	down	NA
Zm00001d039066	-1.33607	down	Galactose mutarotase-like superfamily protein
Zm00001d010574	-1.33436	down	nuclear factor Y, subunit B1
Zm00001d050382	-1.32965	down	agenet domain-containing protein / bromo-adjacent homology (BAH) domain-containing protein
Zm00001d050909	-1.32927	down	#N/A
Zm00001d028139	-1.32676	down	C2H2-like zinc finger protein
Zm00001d017401	-1.32431	down	stress-inducible protein, putative
Zm00001d029950	-1.32407	down	NA
Zm00001d030830	-1.32399	down	Bifunctional inhibitor/lipid-transfer protein/seed storage 2S albumin superfamily protein
Zm00001d030262	-1.32386	down	NA
Zm00001d012259	-1.32354	down	Major facilitator superfamily protein
Zm00001d044695	-1.32281	down	TRICHOME BIREFRINGENCE-LIKE 11
Zm00001d048573	-1.3199	down	NA
Zm00001d038871	-1.31896	down	Mov34/MPN/PAD-1 family protein
Zm00001d002079	-1.31843	down	DREB and EAR motif protein 3
Zm00001d022563	-1.31656	down	Heat shock protein DnaJ with tetratricopeptide repeat
Zm00001d045202	-1.31639	down	Protein kinase superfamily protein
Zm00001d020741	-1.31624	down	alpha/beta-Hydrolases superfamily protein
Zm00001d032455	-1.31616	down	electron-transfer flavoprotein:ubiquinone oxidoreductase
Zm00001d042655	-1.31573	down	#N/A
Zm00001d035486	-1.31537	down	protamine P1 family protein
Zm00001d018086	-1.31529	down	NA
Zm00001d003091	-1.31223	down	Glycosyltransferase family 29 (sialyltransferase) family protein
Zm00001d032161	-1.31215	down	D-mannose binding lectin protein with Apple-like carbohydrate-binding domain
Zm00001d025821	-1.31149	down	Plant protein of unknown function (DUF828)
Zm00001d013746	-1.30833	down	Protein of unknown function (DUF620)
Zm00001d001964	-1.30827	down	SAUR-like auxin-responsive protein family
Zm00001d037181	-1.30805	down	Protein of unknown function (DUF1645)
Zm00001d032636	-1.308	down	GRAM domain-containing protein / ABA-responsive protein-related
Zm00001d053819	-1.30732	down	auxin response factor 8
Zm00001d034037	-1.30592	down	Heavy metal transport/detoxification superfamily protein
Zm00001d014145	-1.30428	down	NA
Zm00001d040171	-1.30352	down	#N/A
Zm00001d011398	-1.30158	down	NA
Zm00001d002614	-1.30064	down	Major Facilitator Superfamily with SPX (SYG1/Pho81/XPR1) domain-containing protein
Zm00001d021726	-1.30055	down	S-locus lectin protein kinase family protein
Zm00001d014937	-1.29973	down	NA
Zm00001d032781	-1.29825	down	NA
Zm00001d001806	-1.29632	down	DNA mismatch repair protein MutS, type 2
Zm00001d032873	-1.29576	down	Heavy metal transport/detoxification superfamily protein
Zm00001d014241	-1.29381	down	myosin, putative
Zm00001d022234	-1.2905	down	Calcium-binding EF-hand family protein
Zm00001d044985	-1.28874	down	pantothenate kinase 2
Zm00001d053120	-1.28751	down	protein kinase family protein / peptidoglycan-binding LysM domain-containing protein
Zm00001d021948	-1.28718	down	Protein kinase superfamily protein
Zm00001d033256	-1.28592	down	patatin-like protein 6
Zm00001d032582	-1.28334	down	NA
Zm00001d027141	-1.2828	down	#N/A
Zm00001d020172	-1.27767	down	Leucine-rich repeat transmembrane protein kinase
Zm00001d033797	-1.27747	down	alpha/beta-Hydrolases superfamily protein
Zm00001d018660	-1.27587	down	AMP-dependent synthetase and ligase family protein
Zm00001d000238	-1.27339	down	growth-regulating factor 2
Zm00001d005300	-1.27232	down	myb domain protein 70
Zm00001d048683	-1.27208	down	IBR domain-containing protein
Zm00001d038994	-1.27101	down	sequence-specific DNA binding transcription factors
Zm00001d051873	-1.27045	down	SIGNAL PEPTIDE PEPTIDASE-LIKE 2
Zm00001d037354	-1.2686	down	alpha/beta-Hydrolases superfamily protein
Zm00001d016866	-1.26798	down	cofactor of nitrate reductase and xanthine dehydrogenase 2
Zm00001d006029	-1.26773	down	NA
Zm00001d044088	-1.2664	down	prenylcysteine methylesterase
Zm00001d013324	-1.26609	down	ATP synthase delta-subunit gene
Zm00001d047774	-1.26586	down	UDP-glucuronic acid decarboxylase 1
Zm00001d007077	-1.26403	down	TRAF-type zinc finger-related
Zm00001d012603	-1.26395	down	methyl esterase 1
Zm00001d031530	-1.26214	down	#N/A
Zm00001d044318	-1.26154	down	voltage dependent anion channel 1
Zm00001d028004	-1.26062	down	Outer arm dynein light chain 1 protein
Zm00001d051339	-1.26002	down	NA
Zm00001d016727	-1.2596	down	#N/A
Zm00001d044035	-1.25913	down	ketol-acid reductoisomerase
Zm00001d029680	-1.25755	down	NA
Zm00001d042146	-1.25685	down	hexokinase-like 1
Zm00001d034489	-1.25528	down	NA
Zm00001d041972	-1.25447	down	cellulose synthase like G2
Zm00001d024824	-1.25436	down	Fibronectin type III domain-containing protein
Zm00001d001882	-1.25415	down	signal recognition particle 19 kDa protein, putative / SRP19, putative
Zm00001d015844	-1.25293	down	NA
Zm00001d042887	-1.2527	down	Protein of unknown function (DUF668)
Zm00001d040365	-1.25187	down	#N/A
Zm00001d024317	-1.25185	down	HXXXD-type acyl-transferase family protein
Zm00001d033957	-1.25115	down	basic helix-loop-helix (bHLH) DNA-binding superfamily protein
Zm00001d029154	-1.25087	down	#N/A
Zm00001d016467	-1.25007	down	#N/A
Zm00001d053966	-1.24701	down	NA
Zm00001d011066	-1.24663	down	Protein kinase superfamily protein
Zm00001d016492	-1.24569	down	Protein of unknown function (DUF679)
Zm00001d012909	-1.24528	down	alpha/beta-Hydrolases superfamily protein
Zm00001d040340	-1.24293	down	PQ-loop repeat family protein / transmembrane family protein
Zm00001d030760	-1.24256	down	Asparagine synthase family protein
Zm00001d047302	-1.2422	down	casein lytic proteinase B3
Zm00001d025362	-1.24179	down	Abscisic acid-responsive (TB2/DP1, HVA22) family protein
Zm00001d036227	-1.23873	down	#N/A
Zm00001d002429	-1.23755	down	growth-regulating factor 5
Zm00001d044244	-1.23736	down	Protein of unknown function (DUF3511)
Zm00001d013611	-1.23721	down	ethylene-responsive nuclear protein / ethylene-regulated nuclear protein (ERT2)
Zm00001d052855	-1.23684	down	HEAT SHOCK PROTEIN 81.4
Zm00001d018049	-1.23503	down	HVA22 homologue A
Zm00001d013111	-1.23451	down	DNAJ homologue 2
Zm00001d002478	-1.23407	down	NDR1/HIN1-like 8
Zm00001d023456	-1.23366	down	#N/A
Zm00001d033983	-1.23347	down	Aluminium induced protein with YGL and LRDR motifs
Zm00001d021789	-1.23255	down	aspartic proteinase A1
Zm00001d015918	-1.23204	down	NA
Zm00001d020552	-1.23088	down	tetraspanin8
Zm00001d029785	-1.23007	down	BR-signaling kinase 1
Zm00001d033855	-1.22972	down	Sulfite exporter TauE/SafE family protein
Zm00001d037857	-1.2297	down	NA
Zm00001d012782	-1.22906	down	UDP-glucosyl transferase 88A1
Zm00001d030220	-1.22905	down	alpha/beta-Hydrolases superfamily protein
Zm00001d028230	-1.22896	down	#N/A
Zm00001d013325	-1.22866	down	NA
Zm00001d043972	-1.22844	down	ribosomal protein L12-C
Zm00001d039324	-1.22698	down	cytokinin response factor 4
Zm00001d014080	-1.22588	down	NA
Zm00001d042285	-1.22475	down	#N/A
Zm00001d033718	-1.221	down	Glycolipid transfer protein (GLTP) family protein
Zm00001d025050	-1.22058	down	Signal transduction histidine kinase, hybrid-type, ethylene sensor
Zm00001d047325	-1.21928	down	NA
Zm00001d050568	-1.21833	down	#N/A
Zm00001d021649	-1.21827	down	Ras-related small GTP-binding family protein
Zm00001d040775	-1.21664	down	GATA transcription factor 16
Zm00001d040826	-1.21595	down	NA
Zm00001d010957	-1.2147	down	iron-regulated protein 3
Zm00001d046263	-1.2139	down	amino acid permease 1
Zm00001d007864	-1.21298	down	#N/A
Zm00001d014317	-1.21257	down	NA
Zm00001d009027	-1.21238	down	DNAJ heat shock family protein
Zm00001d035597	-1.21162	down	RmlC-like cupins superfamily protein
Zm00001d003003	-1.21088	down	#N/A
Zm00001d040291	-1.2096	down	Dynein light chain type 1 family protein
Zm00001d011499	-1.20868	down	cytokinin response factor 4
Zm00001d052843	-1.20862	down	NA
Zm00001d031131	-1.20815	down	calcium exchanger 7
Zm00001d043950	-1.20776	down	WRKY DNA-binding protein 28
Zm00001d036035	-1.20614	down	Cyclophilin-like peptidyl-prolyl cis-trans isomerase family protein
Zm00001d044162	-1.20611	down	#N/A
Zm00001d039050	-1.20572	down	DNA glycosylase superfamily protein
Zm00001d026512	-1.20548	down	UDP-glucosyl transferase 73C7
Zm00001d014166	-1.20446	down	ATPase E1-E2 type family protein / haloacid dehalogenase-like hydrolase family protein
Zm00001d037927	-1.20435	down	NA
Zm00001d035965	-1.20427	down	growth-regulating factor 5
Zm00001d042055	-1.20256	down	CRT (chloroquine-resistance transporter)-like transporter 1
Zm00001d016839	-1.20171	down	homolog of X-ray repair cross complementing 3 (XRCC3)
Zm00001d016891	-1.20059	down	Galactosyltransferase family protein
Zm00001d035180	-1.19885	down	#N/A
Zm00001d039245	-1.19813	down	WRKY family transcription factor
Zm00001d015723	-1.19787	down	#N/A
Zm00001d024729	-1.1976	down	shaggy-related kinase 11
Zm00001d033463	-1.19746	down	SAUR-like auxin-responsive protein family
Zm00001d007839	-1.19697	down	RNA-binding (RRM/RBD/RNP motifs) family protein
Zm00001d016902	-1.19618	down	GTP cyclohydrolase II
Zm00001d003025	-1.19551	down	ammonium transporter 1;1
Zm00001d003981	-1.19467	down	chaperone protein dnaJ-related
Zm00001d002541	-1.19456	down	Transducin/WD40 repeat-like superfamily protein
Zm00001d012861	-1.19361	down	OxaA/YidC-like membrane insertion protein
Zm00001d016768	-1.19268	down	cytosolic invertase 2
Zm00001d028325	-1.19262	down	Cytochrome P450 superfamily protein
Zm00001d045432	-1.19243	down	NA
Zm00001d026017	-1.19148	down	Homeodomain-like superfamily protein
Zm00001d026737	-1.19136	down	#N/A
Zm00001d002806	-1.19113	down	salt tolerance homolog2
Zm00001d030725	-1.18983	down	heat shock protein 70
Zm00001d003492	-1.18881	down	Myosin heavy chain-related protein
Zm00001d025982	-1.18839	down	#N/A
Zm00001d003395	-1.18439	down	anthranilate synthase beta subunit 1
Zm00001d022542	-1.18427	down	TGACG motif-binding factor 6
Zm00001d036602	-1.18414	down	Protein kinase superfamily protein
Zm00001d044806	-1.18389	down	Serine/threonine-protein kinase WNK (With No Lysine)-related
Zm00001d015163	-1.18367	down	receptor-like kinase in in flowers 3
Zm00001d031536	-1.18	down	OSBP(oxysterol binding protein)-related protein 4C
Zm00001d048085	-1.17492	down	#N/A
Zm00001d028693	-1.17443	down	glutathione transferase lambda 2
Zm00001d039327	-1.17442	down	S-locus lectin protein kinase family protein
Zm00001d033590	-1.17411	down	Ribosomal L18p/L5e family protein
Zm00001d034849	-1.17343	down	Sterile alpha motif (SAM) domain-containing protein
Zm00001d014765	-1.17124	down	salt tolerance homolog2
Zm00001d021927	-1.17019	down	Brassinosteroid signalling positive regulator (BZR1) family protein
Zm00001d039582	-1.16988	down	#N/A
Zm00001d036216	-1.16869	down	RNI-like superfamily protein
Zm00001d015783	-1.16865	down	Glycosyl hydrolase superfamily protein
Zm00001d011152	-1.16824	down	Ribosomal protein S4 (RPS4A) family protein
Zm00001d043187	-1.16755	down	#N/A
Zm00001d009741	-1.16658	down	#N/A
Zm00001d020685	-1.16591	down	Microtubule associated protein (MAP65/ASE1) family protein
Zm00001d015397	-1.1652	down	#N/A
Zm00001d019358	-1.16371	down	NA
Zm00001d034859	-1.16332	down	NA
Zm00001d007610	-1.1631	down	NA
Zm00001d005648	-1.16256	down	SPFH/Band 7/PHB domain-containing membrane-associated protein family
Zm00001d037624	-1.16218	down	RING/U-box superfamily protein
Zm00001d017968	-1.16213	down	NA
Zm00001d002369	-1.16159	down	Protein phosphatase 2C family protein
Zm00001d052229	-1.1606	down	related to AP2 4
Zm00001d027325	-1.1606	down	Peptidoglycan-binding LysM domain-containing protein
Zm00001d046967	-1.15859	down	nuclear factor Y, subunit C2
Zm00001d049502	-1.15838	down	NA
Zm00001d015372	-1.15806	down	#N/A
Zm00001d033301	-1.15751	down	translocase of the outer mitochondrial membrane 6
Zm00001d022427	-1.15735	down	Zinc finger (CCCH-type) family protein / RNA recognition motif (RRM)-containing protein
Zm00001d028962	-1.15735	down	WRKY DNA-binding protein 46
Zm00001d052682	-1.15615	down	cofactor assembly of complex C
Zm00001d047342	-1.15566	down	NA
Zm00001d042328	-1.1543	down	HCP-like superfamily protein with MYND-type zinc finger
Zm00001d033488	-1.15343	down	membrin 11
Zm00001d007018	-1.15324	down	NA
Zm00001d016075	-1.15166	down	NA
Zm00001d036402	-1.15112	down	Protein of unknown function (DUF668)
Zm00001d026845	-1.15081	down	#N/A
Zm00001d040066	-1.15059	down	Glycosyltransferase family 61 protein
Zm00001d015279	-1.15006	down	HOPW1-1-interacting 2
Zm00001d034368	-1.1498	down	DNAJ homologue 2
Zm00001d042108	-1.14892	down	EF hand calcium-binding protein family
Zm00001d020687	-1.14872	down	PDI-like 2-2
Zm00001d047675	-1.14803	down	Protein of unknown function (DUF3511)
Zm00001d046117	-1.14763	down	#N/A
Zm00001d042005	-1.14672	down	NA
Zm00001d003652	-1.14609	down	NA
Zm00001d021753	-1.14481	down	NA
Zm00001d052208	-1.14278	down	NA
Zm00001d031129	-1.14184	down	HSP20-like chaperones superfamily protein
Zm00001d022212	-1.141	down	NA
Zm00001d037714	-1.14023	down	NA
Zm00001d006008	-1.14014	down	HEAT SHOCK PROTEIN 81.4
Zm00001d022617	-1.13901	down	NA
Zm00001d024913	-1.13773	down	#N/A
Zm00001d048369	-1.13755	down	CCT motif family protein
Zm00001d020705	-1.13753	down	basic helix-loop-helix (bHLH) DNA-binding superfamily protein
Zm00001d053082	-1.13706	down	Protein kinase superfamily protein
Zm00001d030018	-1.137	down	tobamovirus multiplication 2B
Zm00001d029920	-1.13654	down	Nucleotide-diphospho-sugar transferases superfamily protein
Zm00001d036597	-1.13504	down	Small nuclear ribonucleoprotein family protein
Zm00001d045533	-1.1346	down	NA
Zm00001d034221	-1.13318	down	Protein of unknown function (DUF1005)
Zm00001d041332	-1.13298	down	zinc finger protein 7
Zm00001d036536	-1.13244	down	ethylene responsive element binding factor 4
Zm00001d011543	-1.1315	down	Thioredoxin superfamily protein
Zm00001d052667	-1.12875	down	nudix hydrolase homolog 12
Zm00001d034618	-1.12869	down	NA
Zm00001d039416	-1.1278	down	alpha/beta-Hydrolases superfamily protein
Zm00001d013390	-1.12703	down	Glycosyl hydrolase family 17 protein
Zm00001d003035	-1.12664	down	Tetratricopeptide repeat (TPR)-like superfamily protein
Zm00001d034655	-1.12604	down	poltergeist like 4
Zm00001d014224	-1.12551	down	Mitochondrial substrate carrier family protein
Zm00001d041236	-1.12546	down	Leucine-rich receptor-like protein kinase family protein
Zm00001d011455	-1.12513	down	Uncharacterised protein family (UPF0497)
Zm00001d051033	-1.12462	down	NA
Zm00001d013834	-1.12399	down	P-loop containing nucleoside triphosphate hydrolases superfamily protein
Zm00001d005849	-1.12381	down	Histone H3 K4-specific methyltransferase SET7/9 family protein
Zm00001d007845	-1.12332	down	Protein of unknown function (DUF1005)
Zm00001d031444	-1.12291	down	#N/A
Zm00001d038459	-1.12037	down	ENTH/VHS/GAT family protein
Zm00001d019241	-1.12015	down	NA
Zm00001d046883	-1.1199	down	CSL zinc finger domain-containing protein
Zm00001d042767	-1.11977	down	NA
Zm00001d033854	-1.11931	down	#N/A
Zm00001d013210	-1.1181	down	NA
Zm00001d008665	-1.11806	down	#N/A
Zm00001d029050	-1.11729	down	serine/threonine protein kinase 2
Zm00001d051842	-1.11723	down	metallo-beta-lactamase family protein
Zm00001d016599	-1.1164	down	NA
Zm00001d023868	-1.11615	down	Galactose oxidase/kelch repeat superfamily protein
Zm00001d035015	-1.11582	down	#N/A
Zm00001d008681	-1.1147	down	photosystem II subunit X
Zm00001d018155	-1.11436	down	fucosyltransferase 1
Zm00001d012522	-1.11423	down	Protein of unknown function (DUF607)
Zm00001d032449	-1.11349	down	long-chain base (LCB) kinase 1
Zm00001d005752	-1.11276	down	Plant protein of unknown function (DUF868)
Zm00001d011881	-1.11243	down	scarecrow-like 3
Zm00001d049256	-1.11223	down	NA
Zm00001d033510	-1.11217	down	NA
Zm00001d033397	-1.11148	down	CBS domain-containing protein with a domain of unknown function (DUF21)
Zm00001d031639	-1.10987	down	ACT domain repeat 4
Zm00001d033707	-1.10961	down	microsomal glutathione s-transferase, putative
Zm00001d009746	-1.10936	down	NA
Zm00001d013667	-1.1091	down	#N/A
Zm00001d044622	-1.10848	down	RNI-like superfamily protein
Zm00001d017778	-1.10711	down	cryptochrome-interacting basic-helix-loop-helix 1
Zm00001d001907	-1.10702	down	#N/A
Zm00001d008392	-1.10649	down	DNAJ-like 20
Zm00001d019725	-1.10642	down	uclacyanin 1
Zm00001d007445	-1.10614	down	flavin-binding, kelch repeat, f box 1
Zm00001d006881	-1.10613	down	NA
Zm00001d034145	-1.1058	down	salt tolerance zinc finger
Zm00001d015721	-1.10507	down	Cytochrome P450 superfamily protein
Zm00001d027998	-1.10409	down	VQ motif-containing protein
Zm00001d042268	-1.10365	down	Protein kinase superfamily protein
Zm00001d003064	-1.10353	down	myb domain protein 15
Zm00001d017964	-1.10268	down	RNA-dependent RNA polymerase 1
Zm00001d012957	-1.10016	down	expansin A4
Zm00001d024678	-1.10012	down	Protein kinase superfamily protein
Zm00001d003511	-1.09966	down	Mitochondrial substrate carrier family protein
Zm00001d011799	-1.09945	down	Nuclear transport factor 2 (NTF2) family protein
Zm00001d029979	-1.0985	down	Histone H3 K4-specific methyltransferase SET7/9 family protein
Zm00001d029908	-1.09841	down	alpha/beta-Hydrolases superfamily protein
Zm00001d047535	-1.09723	down	calmodulin like 42
Zm00001d011666	-1.09601	down	calcium-dependent protein kinase 19
Zm00001d005215	-1.09421	down	RAS 5
Zm00001d007640	-1.09265	down	F-box/RNI-like superfamily protein
Zm00001d022465	-1.09151	down	Subunits of heterodimeric actin filament capping protein Capz superfamily
Zm00001d042848	-1.08971	down	laccase 7
Zm00001d016850	-1.08929	down	co-factor for nitrate, reductase and xanthine dehydrogenase 7
Zm00001d021520	-1.08916	down	Ran BP2/NZF zinc finger-like superfamily protein
Zm00001d008427	-1.08908	down	1-deoxy-D-xylulose 5-phosphate reductoisomerase
Zm00001d047497	-1.08819	down	Protein of unknown function (DUF300)
Zm00001d022083	-1.08781	down	translocase inner membrane subunit 17-2
Zm00001d051615	-1.08754	down	Concanavalin A-like lectin protein kinase family protein
Zm00001d028274	-1.08714	down	Cyclin family protein
Zm00001d005164	-1.08697	down	calcium-dependent protein kinase 28
Zm00001d053188	-1.08689	down	EF hand calcium-binding protein family
Zm00001d001824	-1.08608	down	#N/A
Zm00001d033456	-1.08565	down	ethylene-responsive nuclear protein / ethylene-regulated nuclear protein (ERT2)
Zm00001d028309	-1.08555	down	NA
Zm00001d011041	-1.0854	down	Protein of unknown function (DUF1635)
Zm00001d016349	-1.08529	down	RNA-binding (RRM/RBD/RNP motifs) family protein
Zm00001d014745	-1.08522	down	NA
Zm00001d007530	-1.08428	down	Protein phosphatase 2C family protein
Zm00001d014347	-1.08427	down	#N/A
Zm00001d051343	-1.08419	down	Protein kinase superfamily protein
Zm00001d010901	-1.08353	down	NA
Zm00001d002833	-1.08074	down	Eukaryotic aspartyl protease family protein
Zm00001d043998	-1.07981	down	ubiquitin conjugating enzyme 9
Zm00001d039259	-1.07974	down	DNAJ heat shock family protein
Zm00001d035236	-1.07921	down	Plant calmodulin-binding protein-related
Zm00001d044510	-1.07905	down	DEAD box RNA helicase 1
Zm00001d016052	-1.07814	down	WRKY DNA-binding protein 27
Zm00001d015186	-1.07731	down	Glycosyltransferase family 61 protein
Zm00001d031783	-1.07703	down	#N/A
Zm00001d021706	-1.07674	down	histone H2A 2
Zm00001d052803	-1.07635	down	ortholog of human splicing factor SC35
Zm00001d027856	-1.07564	down	Galactose oxidase/kelch repeat superfamily protein
Zm00001d024672	-1.07556	down	plant U-box 8
Zm00001d009580	-1.07554	down	urease accessory protein G
Zm00001d015829	-1.07518	down	heavy metal atpase 5
Zm00001d051503	-1.07517	down	Plant invertase/pectin methylesterase inhibitor superfamily protein
Zm00001d048139	-1.07489	down	#N/A
Zm00001d012580	-1.07486	down	NA
Zm00001d014532	-1.07445	down	Protein of unknown function (DUF579)
Zm00001d017954	-1.07397	down	NB-ARC domain-containing disease resistance protein
Zm00001d014135	-1.07333	down	NA
Zm00001d010902	-1.07326	down	#N/A
Zm00001d024890	-1.07315	down	Domain of unknown function (DUF303)
Zm00001d053890	-1.07311	down	squamosa promoter binding protein-like 2
Zm00001d012848	-1.07136	down	Sterile alpha motif (SAM) domain-containing protein
Zm00001d025528	-1.07079	down	NAD(P)-linked oxidoreductase superfamily protein
Zm00001d045296	-1.07065	down	NA
Zm00001d011527	-1.07033	down	WRKY DNA-binding protein 71
Zm00001d001766	-1.07013	down	NA
Zm00001d033401	-1.06704	down	lipases;hydrolases, acting on ester bonds
Zm00001d041926	-1.06653	down	transcription factor-related
Zm00001d012448	-1.06574	down	Protein of unknown function (DUF3317)
Zm00001d033573	-1.06547	down	#N/A
Zm00001d017825	-1.06423	down	Predicted AT-hook DNA-binding family protein
Zm00001d021955	-1.06381	down	NA
Zm00001d034448	-1.06365	down	#N/A
Zm00001d029584	-1.06352	down	zinc finger of Arabidopsis thaliana 6
Zm00001d034404	-1.0634	down	ubiquiting-conjugating enzyme 2
Zm00001d014017	-1.0633	down	NA
Zm00001d018813	-1.06318	down	Galactose oxidase/kelch repeat superfamily protein
Zm00001d009555	-1.06215	down	Protein of unknown function (DUF1421)
Zm00001d034107	-1.06145	down	cytochrome P450, family 81, subfamily D, polypeptide 5
Zm00001d020835	-1.06103	down	Prolyl oligopeptidase family protein
Zm00001d046723	-1.06039	down	#N/A
Zm00001d021486	-1.05945	down	NA
Zm00001d028987	-1.0593	down	aminophospholipid ATPase 1
Zm00001d030106	-1.05909	down	#N/A
Zm00001d045051	-1.05895	down	RING/U-box superfamily protein
Zm00001d016922	-1.05881	down	Major facilitator superfamily protein
Zm00001d029996	-1.05724	down	RING/U-box superfamily protein
Zm00001d039439	-1.05633	down	BES1/BZR1 homolog 4
Zm00001d011758	-1.05534	down	NA
Zm00001d034508	-1.05519	down	Galactosyltransferase family protein
Zm00001d013239	-1.05501	down	Protein of unknown function (DUF1336)
Zm00001d025380	-1.0524	down	Tetratricopeptide repeat (TPR)-like superfamily protein
Zm00001d007840	-1.05227	down	Integrase-type DNA-binding superfamily protein
Zm00001d013311	-1.0522	down	#N/A
Zm00001d028612	-1.05146	down	NA
Zm00001d051461	-1.05041	down	SCARECROW-like 8
Zm00001d026128	-1.05031	down	#N/A
Zm00001d050544	-1.04907	down	Carbohydrate-binding X8 domain superfamily protein
Zm00001d013817	-1.04906	down	Transmembrane proteins 14C
Zm00001d025514	-1.04889	down	sequence-specific DNA binding transcription factors
Zm00001d039519	-1.0487	down	FAD/NAD(P)-binding oxidoreductase
Zm00001d010152	-1.04726	down	NC domain-containing protein-related
Zm00001d019184	-1.04703	down	NA
Zm00001d028946	-1.04604	down	5\'-AMP-activated protein kinase beta-2 subunit protein
Zm00001d046940	-1.04586	down	FK506-binding protein 13
Zm00001d012505	-1.04548	down	WRKY DNA-binding protein 67
Zm00001d011092	-1.04544	down	transcription initiation factor IIA gamma chain / TFIIA-gamma (TFIIA-S)
Zm00001d028572	-1.04495	down	Glucose-1-phosphate adenylyltransferase family protein
Zm00001d039974	-1.04474	down	NA
Zm00001d037035	-1.04448	down	cyclic nucleotide gated channel 1
Zm00001d029924	-1.04422	down	Flavin-binding monooxygenase family protein
Zm00001d045124	-1.04312	down	Octicosapeptide/Phox/Bem1p family protein
Zm00001d018244	-1.0428	down	NA
Zm00001d048533	-1.04279	down	NA
Zm00001d052619	-1.04232	down	#N/A
Zm00001d052661	-1.04182	down	NA
Zm00001d007272	-1.04151	down	ENTH/ANTH/VHS superfamily protein
Zm00001d000310	-1.04131	down	Protein of unknown function (DUF567)
Zm00001d024430	-1.03854	down	somatic embryogenesis receptor-like kinase 1
Zm00001d047607	-1.03853	down	poly(A) polymerase 3
Zm00001d034600	-1.03852	down	Sphingomyelin synthetase family protein
Zm00001d033402	-1.03838	down	NA
Zm00001d051803	-1.03834	down	NA
Zm00001d034572	-1.03823	down	DNA-binding storekeeper protein-related
Zm00001d045309	-1.038	down	RING/U-box superfamily protein
Zm00001d003797	-1.03769	down	ferredoxin 3
Zm00001d013009	-1.03724	down	RNA-binding (RRM/RBD/RNP motifs) family protein
Zm00001d005798	-1.03565	down	Integrase-type DNA-binding superfamily protein
Zm00001d011155	-1.03542	down	DEAD box RNA helicase 1
Zm00001d007255	-1.03462	down	Major facilitator superfamily protein
Zm00001d037281	-1.03456	down	NA
Zm00001d028922	-1.03345	down	NA
Zm00001d011130	-1.03263	down	nucleosome assembly protein 1;2
Zm00001d043850	-1.03221	down	Ubiquitin-like superfamily protein
Zm00001d034184	-1.03168	down	allene oxide synthase
Zm00001d041246	-1.03153	down	#N/A
Zm00001d028995	-1.0307	down	Arabidopsis NAC domain containing protein 87
Zm00001d001803	-1.03049	down	Plasma-membrane choline transporter family protein
Zm00001d017761	-1.03044	down	Protein of unknown function (DUF1218)
Zm00001d017864	-1.03037	down	Eukaryotic aspartyl protease family protein
Zm00001d027265	-1.03014	down	H(+)-ATPase 4
Zm00001d013872	-1.03005	down	#N/A
Zm00001d047385	-1.02945	down	Protein phosphatase 2C family protein
Zm00001d047594	-1.02926	down	5\'-AMP-activated protein kinase beta-2 subunit protein
Zm00001d027873	-1.02866	down	NA
Zm00001d037297	-1.02829	down	NSP-interacting kinase 1
Zm00001d022134	-1.02797	down	Translation elongation factor EF1B/ribosomal protein S6 family protein
Zm00001d038225	-1.02755	down	SCARECROW-like 1
Zm00001d049764	-1.02666	down	myosin heavy chain-related
Zm00001d003840	-1.02557	down	NA
Zm00001d000313	-1.02497	down	#N/A
Zm00001d019541	-1.02475	down	NA
Zm00001d034764	-1.02459	down	Lysyl-tRNA synthetase, class II
Zm00001d052473	-1.02395	down	NA
Zm00001d029608	-1.02386	down	MSCS-like 2
Zm00001d006794	-1.02338	down	tRNA/rRNA methyltransferase (SpoU) family protein
Zm00001d035552	-1.02311	down	arginine/serine-rich zinc knuckle-containing protein 33
Zm00001d026245	-1.02305	down	Homeodomain-like superfamily protein
Zm00001d011625	-1.02286	down	Protein kinase superfamily protein
Zm00001d045064	-1.02249	down	mitogen-activated protein kinase kinase 4
Zm00001d053018	-1.02241	down	RING/U-box superfamily protein
Zm00001d018507	-1.02168	down	BET1P/SFT1P-like protein 14A
Zm00001d018414	-1.02105	down	auxin-induced protein 13
Zm00001d003904	-1.02075	down	Transport protein particle (TRAPP) component
Zm00001d033652	-1.02034	down	#N/A
Zm00001d031777	-1.01992	down	Histone H3 K4-specific methyltransferase SET7/9 family protein
Zm00001d053818	-1.01954	down	Protein kinase superfamily protein
Zm00001d033503	-1.01921	down	#N/A
Zm00001d031870	-1.01919	down	zinc finger (C2H2 type) family protein
Zm00001d003017	-1.01894	down	adenosine kinase 2
Zm00001d028829	-1.01824	down	Calmodulin-binding protein
Zm00001d002594	-1.01776	down	Ovate family protein
Zm00001d022597	-1.01755	down	NEP-interacting protein 2
Zm00001d013935	-1.01712	down	WAPL (Wings apart-like protein regulation of heterochromatin) protein
Zm00001d038297	-1.01706	down	WIP domain protein 4
Zm00001d014984	-1.0165	down	glycerol-3-phosphate acyltransferase 6
Zm00001d020267	-1.01578	down	Integrase-type DNA-binding superfamily protein
Zm00001d037744	-1.01498	down	Protein kinase family protein
Zm00001d004908	-1.01495	down	NA
Zm00001d052061	-1.01433	down	Vacuolar import/degradation, Vid27-related protein
Zm00001d034255	-1.01417	down	Erythronate-4-phosphate dehydrogenase family protein
Zm00001d053452	-1.01405	down	CTC-interacting domain 8
Zm00001d042192	-1.01382	down	2-oxoglutarate (2OG) and Fe(II)-dependent oxygenase superfamily protein
Zm00001d011620	-1.01344	down	Protein of unknown function (DUF1639)
Zm00001d049860	-1.01319	down	NAC domain containing protein 41
Zm00001d015395	-1.0129	down	urease accessory protein D
Zm00001d027982	-1.01279	down	MATE efflux family protein
Zm00001d012627	-1.01192	down	Insulinase (Peptidase family M16) family protein
Zm00001d008374	-1.01146	down	#N/A
Zm00001d031065	-1.01144	down	NA
Zm00001d031009	-1.01096	down	TESMIN/TSO1-like CXC 2
Zm00001d053522	-1.00974	down	#N/A
Zm00001d018452	-1.00896	down	phloem protein 2-B1
Zm00001d021779	-1.00866	down	F-box family protein
Zm00001d022245	-1.00839	down	calmodulin-binding family protein
Zm00001d028354	-1.00699	down	peptide transporter 2
Zm00001d018969	-1.00689	down	Aldolase-type TIM barrel family protein
Zm00001d031338	-1.00664	down	NA
Zm00001d034129	-1.00647	down	Peroxidase superfamily protein
Zm00001d006677	-1.00614	down	#N/A
Zm00001d047857	-1.00521	down	#N/A
Zm00001d004407	-1.00479	down	Transducin/WD40 repeat-like superfamily protein
Zm00001d014530	-1.00398	down	HXXXD-type acyl-transferase family protein
Zm00001d006488	-1.00363	down	BNR/Asp-box repeat family protein
Zm00001d014659	-1.0031	down	Tautomerase/MIF superfamily protein
Zm00001d019280	-1.00196	down	Cytidine/deoxycytidylate deaminase family protein
Zm00001d031627	-1.00127	down	nuclear transport factor 2B
Zm00001d027479	-1.00116	down	DNA polymerase delta small subunit
Zm00001d039643	-1.00051	down	don-glucosyltransferase 1
Zm00001d016990	1.00206	up	transferases;sulfuric ester hydrolases;catalytics;transferases
Zm00001d017869	1.00214	up	Eukaryotic aspartyl protease family protein
Zm00001d051779	1.00225	up	Eukaryotic aspartyl protease family protein
Zm00001d036840	1.00243	up	BTB/POZ domain-containing protein
Zm00001d030471	1.00349	up	1,2-alpha-L-fucosidases
Zm00001d045598	1.00381	up	Protein of unknown function (DUF594)
Zm00001d024518	1.00419	up	acyl-CoA-binding protein 6
Zm00001d047796	1.00423	up	rhamnose biosynthesis 1
Zm00001d010462	1.00514	up	RING/U-box superfamily protein
Zm00001d006181	1.00573	up	RNA-binding (RRM/RBD/RNP motifs) family protein
Zm00001d053060	1.00599	up	myb domain protein 4
Zm00001d043922	1.00698	up	Transcriptional factor B3 family protein / auxin-responsive factor AUX/IAA-related
Zm00001d032715	1.00701	up	casein kinase I-like 6
Zm00001d012973	1.00775	up	Chloroplast-targeted copper chaperone protein
Zm00001d052622	1.00794	up	GLU-ADT subunit B
Zm00001d020595	1.00814	up	Integrase-type DNA-binding superfamily protein
Zm00001d053358	1.00814	up	Galactose oxidase/kelch repeat superfamily protein
Zm00001d049028	1.00927	up	NA
Zm00001d044605	1.01023	up	fatty acid desaturase 8
Zm00001d005144	1.0111	up	NAD(P)-binding Rossmann-fold superfamily protein
Zm00001d017771	1.01207	up	NmrA-like negative transcriptional regulator family protein
Zm00001d013654	1.01222	up	C2 calcium/lipid-binding plant phosphoribosyltransferase family protein
Zm00001d007908	1.01245	up	alpha/beta-Hydrolases superfamily protein
Zm00001d027366	1.0127	up	peroxin 11c
Zm00001d045069	1.01328	up	Ribosomal protein L19e family protein
Zm00001d022057	1.01358	up	hydroxyproline-rich glycoprotein family protein
Zm00001d018468	1.01373	up	GroES-like zinc-binding dehydrogenase family protein
Zm00001d029443	1.01428	up	phosphatidylinositol-4-phosphate 5-kinase family protein
Zm00001d027880	1.01585	up	Acyl-CoA N-acyltransferase with RING/FYVE/PHD-type zinc finger domain
Zm00001d042092	1.01635	up	#N/A
Zm00001d040220	1.01646	up	haloacid dehalogenase-like hydrolase family protein
Zm00001d031863	1.01655	up	NA
Zm00001d037477	1.0168	up	Calcium-binding EF-hand family protein
Zm00001d030421	1.01705	up	RING/U-box superfamily protein
Zm00001d032022	1.01737	up	glycosyl hydrolase family 35 protein
Zm00001d036750	1.01849	up	heptahelical transmembrane protein1
Zm00001d005275	1.0187	up	ARM repeat superfamily protein
Zm00001d047750	1.01914	up	NA
Zm00001d026439	1.0192	up	Tetratricopeptide repeat (TPR)-like superfamily protein
Zm00001d009373	1.01987	up	Peroxidase superfamily protein
Zm00001d022510	1.02067	up	disproportionating enzyme 2
Zm00001d044303	1.02083	up	#N/A
Zm00001d046489	1.02213	up	NA
Zm00001d030048	1.02284	up	pfkB-like carbohydrate kinase family protein
Zm00001d009780	1.02362	up	gamma-tubulin complex protein 2
Zm00001d019139	1.02372	up	sterol methyltransferase 1
Zm00001d008954	1.02404	up	Plant protein 1589 of unknown function
Zm00001d021838	1.02409	up	NA
Zm00001d016995	1.0242	up	#N/A
Zm00001d040788	1.02837	up	exocyst complex component sec15B
Zm00001d040213	1.02885	up	NA
Zm00001d037757	1.02941	up	Thioredoxin superfamily protein
Zm00001d020673	1.02955	up	cytochrome P450, family 76, subfamily C, polypeptide 2
Zm00001d002715	1.02966	up	WD-40 repeat family protein / beige-related
Zm00001d039231	1.03086	up	#N/A
Zm00001d045192	1.03145	up	Bifunctional inhibitor/lipid-transfer protein/seed storage 2S albumin superfamily protein
Zm00001d011301	1.03195	up	Alpha amylase family protein
Zm00001d039163	1.03252	up	homology to ABI2
Zm00001d033040	1.03354	up	Calcineurin-like metallo-phosphoesterase superfamily protein
Zm00001d005271	1.03373	up	serine/threonine protein kinase 3
Zm00001d006179	1.03541	up	RHOMBOID-like 2
Zm00001d003372	1.03573	up	ARM repeat superfamily protein
Zm00001d042264	1.03596	up	aspartate kinase 1
Zm00001d043018	1.03617	up	prenylated RAB acceptor 1.B4
Zm00001d051911	1.03722	up	auxin-induced protein 13
Zm00001d025721	1.0374	up	DNA-binding HORMA family protein
Zm00001d050339	1.03752	up	aldehyde dehydrogenase 10A9
Zm00001d037871	1.03764	up	RNA-binding protein-defense related 1
Zm00001d026369	1.03989	up	NAD(P)-binding Rossmann-fold superfamily protein
Zm00001d025081	1.04014	up	#N/A
Zm00001d012159	1.04028	up	#N/A
Zm00001d048323	1.04045	up	O-fucosyltransferase family protein
Zm00001d050106	1.04067	up	ferredoxin-related
Zm00001d008716	1.04114	up	Protein of Unknown Function (DUF239)
Zm00001d037476	1.04236	up	Pentatricopeptide repeat (PPR) superfamily protein
Zm00001d012546	1.04265	up	20S proteasome alpha subunit G1
Zm00001d031128	1.04297	up	Cobalamin-independent synthase family protein
Zm00001d036283	1.04418	up	NA
Zm00001d051383	1.04563	up	Plant VAMP (vesicle-associated membrane protein) family protein
Zm00001d032373	1.04616	up	ortholog of maize chloroplast splicing factor CRS1
Zm00001d020428	1.04663	up	#N/A
Zm00001d034519	1.04727	up	acyl-activating enzyme 18
Zm00001d033717	1.04788	up	NA
Zm00001d013849	1.0481	up	Duplicated homeodomain-like superfamily protein
Zm00001d047939	1.0482	up	Pathogenesis-related thaumatin superfamily protein
Zm00001d013960	1.04937	up	white-brown complex homolog protein 11
Zm00001d017432	1.04967	up	NA
Zm00001d033837	1.05034	up	Sec14p-like phosphatidylinositol transfer family protein
Zm00001d024311	1.05097	up	SKP1-like 21
Zm00001d010868	1.05114	up	#N/A
Zm00001d029557	1.05144	up	casein lytic proteinase B3
Zm00001d011615	1.05328	up	Microtubule associated protein (MAP65/ASE1) family protein
Zm00001d051250	1.05381	up	thioredoxin M-type 4
Zm00001d049910	1.0539	up	MATE efflux family protein
Zm00001d011673	1.05415	up	farnesyl diphosphate synthase 1
Zm00001d025967	1.0548	up	Protein of unknown function, DUF584
Zm00001d009888	1.05648	up	DNA primases;DNA primases
Zm00001d002353	1.05857	up	HXXXD-type acyl-transferase family protein
Zm00001d002313	1.05892	up	Leucine-rich repeat transmembrane protein kinase
Zm00001d037650	1.05904	up	NB-ARC domain-containing disease resistance protein
Zm00001d003166	1.05915	up	LETM1-like protein
Zm00001d021291	1.05928	up	pseudo-response regulator 5
Zm00001d010899	1.05928	up	NA
Zm00001d025893	1.06008	up	Phosphoenolpyruvate carboxylase family protein
Zm00001d028709	1.06052	up	ascorbate peroxidase 1
Zm00001d052411	1.06181	up	Nucleotide-sugar transporter family protein
Zm00001d028815	1.06243	up	NA
Zm00001d009759	1.06264	up	#N/A
Zm00001d013389	1.06297	up	cyclase associated protein 1
Zm00001d017709	1.06358	up	SCAMP family protein
Zm00001d053852	1.06405	up	NA
Zm00001d032385	1.06405	up	ADP glucose pyrophosphorylase 1
Zm00001d010924	1.06439	up	Peroxidase superfamily protein
Zm00001d005542	1.06506	up	Glucose-6-phosphate/phosphate translocator-related
Zm00001d013055	1.06639	up	vesicle-associated membrane protein 726
Zm00001d012709	1.06656	up	interactor of constitutive active rops 1
Zm00001d039631	1.06666	up	pleiotropic drug resistance 4
Zm00001d013481	1.06685	up	eukaryotic release factor 1-3
Zm00001d048771	1.06704	up	polyol/monosaccharide transporter 5
Zm00001d040691	1.06704	up	Protein kinase superfamily protein
Zm00001d045872	1.06709	up	lipid-binding serum glycoprotein family protein
Zm00001d024825	1.06721	up	BRCT domain-containing DNA repair protein
Zm00001d039496	1.06777	up	Duplicated homeodomain-like superfamily protein
Zm00001d012378	1.06852	up	SOUL heme-binding family protein
Zm00001d024691	1.06976	up	uclacyanin 1
Zm00001d044184	1.07079	up	ABI-1-like 1
Zm00001d003024	1.07097	up	RmlC-like cupins superfamily protein
Zm00001d017036	1.07122	up	PLC-like phosphodiesterase family protein
Zm00001d007107	1.0729	up	NA
Zm00001d013554	1.07319	up	NA
Zm00001d021623	1.07332	up	calcium-dependent protein kinase 15
Zm00001d020881	1.07366	up	WRKY DNA-binding protein 2
Zm00001d050184	1.07483	up	XB3 ortholog 2 in Arabidopsis thaliana
Zm00001d011150	1.07578	up	DEAD/DEAH box RNA helicase family protein
Zm00001d045026	1.07601	up	Transcriptional factor B3 family protein / auxin-responsive factor AUX/IAA-related
Zm00001d034054	1.07622	up	Transducin/WD40 repeat-like superfamily protein
Zm00001d029061	1.07649	up	Pentatricopeptide repeat (PPR-like) superfamily protein
Zm00001d002384	1.07651	up	Plastid-lipid associated protein PAP / fibrillin family protein
Zm00001d018331	1.07673	up	stress-inducible protein, putative
Zm00001d010950	1.07705	up	glutamate-cysteine ligase
Zm00001d028813	1.07725	up	transducin family protein / WD-40 repeat family protein
Zm00001d050241	1.07944	up	polygalacturonase 2
Zm00001d025951	1.08064	up	ATP binding microtubule motor family protein
Zm00001d036719	1.08089	up	DNA glycosylase superfamily protein
Zm00001d053076	1.08092	up	NAD kinase 2
Zm00001d045379	1.08142	up	Coatomer, beta\' subunit
Zm00001d012763	1.08161	up	P-loop nucleoside triphosphate hydrolases superfamily protein with CH (Calponin Homology) domain
Zm00001d012452	1.08273	up	Protein kinase superfamily protein
Zm00001d011765	1.08321	up	sterol 4-alpha-methyl-oxidase 2-2
Zm00001d036139	1.08359	up	#N/A
Zm00001d028575	1.08376	up	NAD(P)-binding Rossmann-fold superfamily protein
Zm00001d009248	1.08378	up	NA
Zm00001d037340	1.08431	up	NA
Zm00001d022175	1.08495	up	Cyclin D2;1
Zm00001d046072	1.08521	up	Protein of unknown function (DUF3133)
Zm00001d033788	1.08612	up	NA
Zm00001d039918	1.08641	up	NA
Zm00001d028862	1.08652	up	NA
Zm00001d027298	1.08665	up	Bestrophin-like protein
Zm00001d017448	1.08693	up	Plant VAMP (vesicle-associated membrane protein) family protein
Zm00001d051925	1.08748	up	Protein kinase superfamily protein
Zm00001d043773	1.08799	up	ENTH/ANTH/VHS superfamily protein
Zm00001d016956	1.08863	up	NA
Zm00001d022598	1.08868	up	Protein of unknown function (DUF630 and DUF632)
Zm00001d002787	1.08881	up	SU(VAR)3-9 homolog 5
Zm00001d043535	1.09021	up	ovate family protein 8
Zm00001d044808	1.0907	up	#N/A
Zm00001d051688	1.09161	up	fimbrin-like protein 2
Zm00001d019123	1.0926	up	Survival protein SurE-like phosphatase/nucleotidase
Zm00001d005881	1.093	up	Remorin family protein
Zm00001d048524	1.09334	up	NA
Zm00001d041067	1.09603	up	Nodulin MtN3 family protein
Zm00001d024927	1.09639	up	RING/U-box superfamily protein
Zm00001d051227	1.09698	up	GroES-like zinc-binding dehydrogenase family protein
Zm00001d041175	1.09768	up	RNI-like superfamily protein
Zm00001d005764	1.09806	up	Protein of unknown function (DUF1666)
Zm00001d049975	1.09822	up	NAD(P)-binding Rossmann-fold superfamily protein
Zm00001d023603	1.09883	up	amino acid permease 2
Zm00001d042653	1.09994	up	DNAJ heat shock family protein
Zm00001d042276	1.10076	up	Exostosin family protein
Zm00001d044693	1.10088	up	dual specificity protein phosphatase (DsPTP1) family protein
Zm00001d007184	1.10286	up	galacturonosyltransferase 7
Zm00001d042366	1.10341	up	NA
Zm00001d017767	1.10359	up	Phosphatidic acid phosphatase (PAP2) family protein
Zm00001d007966	1.10724	up	succinate dehydrogenase 1-1
Zm00001d002688	1.10755	up	Protein kinase superfamily protein
Zm00001d041634	1.10756	up	NA
Zm00001d002491	1.1077	up	RING/U-box superfamily protein
Zm00001d038917	1.10811	up	ARM repeat superfamily protein
Zm00001d018184	1.10896	up	flavonol synthase 1
Zm00001d003212	1.11067	up	Protein kinase superfamily protein
Zm00001d035004	1.11075	up	FORMS APLOID AND BINUCLEATE CELLS 1A
Zm00001d009810	1.11139	up	Core-2/I-branching beta-1,6-N-acetylglucosaminyltransferase family protein
Zm00001d012672	1.11148	up	Amino acid kinase family protein
Zm00001d037097	1.11213	up	NA
Zm00001d023899	1.11224	up	#N/A
Zm00001d018332	1.113	up	glutamate receptor 2.8
Zm00001d029391	1.11301	up	3-deoxy-D-arabino-heptulosonate 7-phosphate synthase 1
Zm00001d050216	1.11363	up	Afadin/alpha-actinin-binding protein
Zm00001d006834	1.11371	up	NA
Zm00001d013795	1.11381	up	Peroxisomal membrane 22 kDa (Mpv17/PMP22) family protein
Zm00001d025002	1.11389	up	Leucine-rich repeat transmembrane protein kinase family protein
Zm00001d038136	1.11425	up	alpha/beta-Hydrolases superfamily protein
Zm00001d002542	1.11427	up	Protein phosphatase 2C family protein
Zm00001d010001	1.11506	up	NA
Zm00001d012731	1.11533	up	Transcriptional factor B3 family protein / auxin-responsive factor AUX/IAA-related
Zm00001d004457	1.11574	up	#N/A
Zm00001d011827	1.11594	up	phosphatidylserine decarboxylase 3
Zm00001d006561	1.11594	up	Protein of unknown function, DUF538
Zm00001d043361	1.11596	up	plasmodesmata callose-binding protein 3
Zm00001d010230	1.11759	up	Protein of unknown function (DUF803)
Zm00001d027500	1.11796	up	low-molecular-weight cysteine-rich 69
Zm00001d052103	1.11878	up	Pectin lyase-like superfamily protein
Zm00001d032103	1.12026	up	4-coumarate:CoA ligase 2
Zm00001d044103	1.12031	up	adenylate kinase 1
Zm00001d007978	1.12057	up	chromatin remodeling 1
Zm00001d014178	1.12074	up	acylaminoacyl-peptidase-related
Zm00001d038198	1.12078	up	DegP protease 10
Zm00001d053858	1.12127	up	EPS15 homology domain 1
Zm00001d013470	1.12186	up	OSBP(oxysterol binding protein)-related protein 1C
Zm00001d008010	1.12276	up	#N/A
Zm00001d013967	1.12425	up	myosin 1
Zm00001d038407	1.12487	up	Kinase interacting (KIP1-like) family protein
Zm00001d013038	1.12583	up	#N/A
Zm00001d002483	1.1265	up	Transducin family protein / WD-40 repeat family protein
Zm00001d034511	1.12664	up	Galactosyltransferase family protein
Zm00001d013582	1.12955	up	TRAM, LAG1 and CLN8 (TLC) lipid-sensing domain containing protein
Zm00001d019700	1.13005	up	NA
Zm00001d047683	1.13057	up	NAD(P)-binding Rossmann-fold superfamily protein
Zm00001d012553	1.13063	up	TGACG motif-binding factor 6
Zm00001d020512	1.13076	up	Phototropic-responsive NPH3 family protein
Zm00001d040570	1.13099	up	NA
Zm00001d002708	1.13153	up	heavy metal atpase 5
Zm00001d029193	1.13205	up	SKU5 similar 3
Zm00001d030581	1.13247	up	Pentatricopeptide repeat (PPR) superfamily protein
Zm00001d018287	1.13351	up	DEAD/DEAH box RNA helicase family protein
Zm00001d032468	1.13353	up	#N/A
Zm00001d031200	1.13562	up	homolog of yeast ergosterol28
Zm00001d028725	1.13572	up	Nucleotide-diphospho-sugar transferases superfamily protein
Zm00001d012447	1.13598	up	ROP interactive partner 3
Zm00001d038076	1.13732	up	Nucleotide-diphospho-sugar transferase family protein
Zm00001d002597	1.13796	up	Rho GTPase activating protein with PAK-box/P21-Rho-binding domain
Zm00001d011225	1.13815	up	NA
Zm00001d002514	1.13913	up	#N/A
Zm00001d029410	1.13935	up	serine carboxypeptidase-like 51
Zm00001d040014	1.13943	up	endonuclease 2
Zm00001d004344	1.14042	up	NA
Zm00001d025944	1.14065	up	Plant-specific transcription factor YABBY family protein
Zm00001d045097	1.14237	up	multidrug resistance-associated protein 11
Zm00001d010325	1.14307	up	small and basic intrinsic protein 1A
Zm00001d038196	1.14345	up	beta-hexosaminidase 3
Zm00001d025917	1.14487	up	galacturonosyltransferase-like 4
Zm00001d019895	1.14491	up	MLP-like protein 423
Zm00001d054071	1.14536	up	Protein kinase superfamily protein
Zm00001d041430	1.15006	up	calmodulin-like 11
Zm00001d013090	1.15051	up	DNAse I-like superfamily protein
Zm00001d006257	1.15133	up	phospholipase D delta
Zm00001d004818	1.15285	up	NA
Zm00001d024458	1.15362	up	NA
Zm00001d052038	1.15413	up	LJRHL1-like 3
Zm00001d012245	1.15599	up	Adenine nucleotide alpha hydrolases-like superfamily protein
Zm00001d045798	1.15641	up	NA
Zm00001d021073	1.15684	up	Esterase/lipase/thioesterase family protein
Zm00001d010948	1.15691	up	KNOTTED1-like homeobox gene 6
Zm00001d007313	1.15711	up	transmembrane kinase 1
Zm00001d002544	1.15713	up	Regulator of chromosome condensation (RCC1) family with FYVE zinc finger domain
Zm00001d006866	1.15718	up	fatty acid biosynthesis 1
Zm00001d038326	1.16127	up	Protein kinase superfamily protein
Zm00001d018365	1.16426	up	NA
Zm00001d010816	1.16519	up	Protein of unknown function (DUF616)
Zm00001d020057	1.16561	up	phosphoenolpyruvate carboxylase 1
Zm00001d030328	1.16577	up	Plant stearoyl-acyl-carrier-protein desaturase family protein
Zm00001d031427	1.16623	up	PEP1 receptor 2
Zm00001d027888	1.16627	up	alpha/beta-Hydrolases superfamily protein
Zm00001d032164	1.16695	up	Plant protein of unknown function (DUF868)
Zm00001d053327	1.16701	up	fucosyltransferase 1
Zm00001d043286	1.16716	up	Phosphoglycerate mutase-like family protein
Zm00001d020892	1.16721	up	Na+/H+ antiporter 6
Zm00001d004898	1.16771	up	RING/U-box superfamily protein
Zm00001d044091	1.16784	up	Protein kinase superfamily protein
Zm00001d003049	1.16806	up	casein kinase I
Zm00001d012423	1.16835	up	Histone superfamily protein
Zm00001d047324	1.16889	up	Protein of unknown function (DUF620)
Zm00001d049583	1.17036	up	DNAJ heat shock family protein
Zm00001d045655	1.17237	up	ARM repeat superfamily protein
Zm00001d043874	1.17275	up	NA
Zm00001d007213	1.17336	up	D-alanine--D-alanine ligase family
Zm00001d052918	1.17356	up	Zinc-finger domain of monoamine-oxidase A repressor R1
Zm00001d000288	1.17608	up	indole-3-acetic acid inducible 2
Zm00001d042180	1.17662	up	NA
Zm00001d038574	1.17727	up	Basic-leucine zipper (bZIP) transcription factor family protein
Zm00001d003252	1.17759	up	glucose-6-phosphate dehydrogenase 6
Zm00001d033746	1.17847	up	Phosphoglucomutase/phosphomannomutase family protein
Zm00001d008330	1.17932	up	Dynein light chain type 1 family protein
Zm00001d032435	1.18072	up	Major facilitator superfamily protein
Zm00001d045885	1.18116	up	Peptidase S41 family protein
Zm00001d051998	1.18151	up	Adaptor protein complex AP-1, gamma subunit
Zm00001d037495	1.18171	up	Major facilitator superfamily protein
Zm00001d011932	1.18351	up	cytochrome P450, family 87, subfamily A, polypeptide 6
Zm00001d003160	1.18374	up	Plant protein of unknown function (DUF828) with plant pleckstrin homology-like region
Zm00001d027633	1.18527	up	transcription activators
Zm00001d051529	1.18565	up	4-coumarate:CoA ligase 3
Zm00001d007489	1.1857	up	Zinc-finger domain of monoamine-oxidase A repressor R1
Zm00001d008295	1.18571	up	ADP-ribosylation factor A1B
Zm00001d010218	1.18627	up	Peroxidase superfamily protein
Zm00001d006473	1.1874	up	NA
Zm00001d023654	1.18774	up	NA
Zm00001d024885	1.18798	up	DPP6 N-terminal domain-like protein
Zm00001d013860	1.18958	up	SH3 domain-containing protein
Zm00001d044970	1.19243	up	Phosphotyrosine protein phosphatases superfamily protein
Zm00001d018214	1.19265	up	O-Glycosyl hydrolases family 17 protein
Zm00001d016008	1.19364	up	ENTH/VHS/GAT family protein
Zm00001d020457	1.1951	up	myb domain protein 30
Zm00001d030967	1.19631	up	ureidoglycolate amidohydrolase
Zm00001d047802	1.19681	up	#N/A
Zm00001d017419	1.1974	up	Protein kinase superfamily protein
Zm00001d050097	1.1979	up	Cytochrome P450 superfamily protein
Zm00001d052191	1.19864	up	uclacyanin 1
Zm00001d025375	1.19895	up	Transducin/WD40 repeat-like superfamily protein
Zm00001d019260	1.19916	up	NA
Zm00001d008772	1.20041	up	NA
Zm00001d027020	1.20047	up	#N/A
Zm00001d042178	1.20055	up	photosystem II reaction center PSB28 protein
Zm00001d043872	1.20139	up	NA
Zm00001d020108	1.20149	up	Galactose mutarotase-like superfamily protein
Zm00001d044116	1.20239	up	Transducin/WD40 repeat-like superfamily protein
Zm00001d020900	1.20331	up	Metallo-hydrolase/oxidoreductase superfamily protein
Zm00001d012612	1.2037	up	Pentatricopeptide repeat (PPR-like) superfamily protein
Zm00001d016176	1.20582	up	Protein kinase superfamily protein
Zm00001d039383	1.20625	up	#N/A
Zm00001d024795	1.2073	up	Leucine-rich repeat protein kinase family protein
Zm00001d015934	1.20846	up	Plant invertase/pectin methylesterase inhibitor superfamily
Zm00001d050572	1.20912	up	#N/A
Zm00001d030555	1.20964	up	receptor-like protein kinase 1
Zm00001d022564	1.21001	up	transcription coactivators
Zm00001d042936	1.21023	up	NA
Zm00001d034957	1.2119	up	Fumarylacetoacetate (FAA) hydrolase family
Zm00001d017939	1.21198	up	B-box type zinc finger protein with CCT domain
Zm00001d026131	1.21269	up	Transmembrane amino acid transporter family protein
Zm00001d050153	1.21443	up	Reticulon family protein
Zm00001d002103	1.21492	up	3-ketoacyl-acyl carrier protein synthase III
Zm00001d029946	1.21577	up	Protein of unknown function (DUF630 and DUF632)
Zm00001d038372	1.21631	up	NA
Zm00001d014459	1.21724	up	#N/A
Zm00001d001909	1.21795	up	Alternative oxidase family protein
Zm00001d005535	1.2199	up	aspartate kinase-homoserine dehydrogenase ii
Zm00001d008724	1.22047	up	NSP-interacting kinase 3
Zm00001d017112	1.22062	up	AP2/B3-like transcriptional factor family protein
Zm00001d002163	1.2211	up	diacylglycerol kinase 5
Zm00001d048627	1.22147	up	ATP-citrate lyase A-3
Zm00001d036131	1.22295	up	protein arginine methyltransferase 10
Zm00001d012868	1.22332	up	FAD/NAD(P)-binding oxidoreductase family protein
Zm00001d028825	1.22359	up	NAD(P)-binding Rossmann-fold superfamily protein
Zm00001d014867	1.22365	up	#N/A
Zm00001d041358	1.22378	up	#N/A
Zm00001d026635	1.22379	up	allantoinase
Zm00001d003961	1.22385	up	NA
Zm00001d025234	1.22412	up	DNA primase, large subunit family
Zm00001d044212	1.22655	up	NAD(P)-linked oxidoreductase superfamily protein
Zm00001d042507	1.22658	up	beta glucosidase 42
Zm00001d005279	1.22708	up	Peroxidase superfamily protein
Zm00001d041439	1.22729	up	NIMA-related kinase 2
Zm00001d043854	1.22759	up	Cytochrome b561/ferric reductase transmembrane with DOMON related domain
Zm00001d043153	1.22791	up	bZIP transcription factor family protein
Zm00001d024463	1.22943	up	NA
Zm00001d002550	1.23027	up	Pentatricopeptide repeat (PPR-like) superfamily protein
Zm00001d017906	1.23062	up	O-fucosyltransferase family protein
Zm00001d012847	1.23076	up	Sec14p-like phosphatidylinositol transfer family protein
Zm00001d030316	1.2317	up	proline-rich protein 2
Zm00001d034916	1.23186	up	MATE efflux family protein
Zm00001d005080	1.232	up	MATE efflux family protein
Zm00001d022619	1.23285	up	minichromosome maintenance 10
Zm00001d004705	1.23322	up	amino acid permease 2
Zm00001d006868	1.2339	up	Aldolase-type TIM barrel family protein
Zm00001d021371	1.23736	up	ALA-interacting subunit 5
Zm00001d053139	1.23904	up	NA
Zm00001d035023	1.23906	up	Transducin/WD40 repeat-like superfamily protein
Zm00001d016017	1.24009	up	PDI-like 1-2
Zm00001d011069	1.24045	up	NAD(P)-binding Rossmann-fold superfamily protein
Zm00001d012337	1.24087	up	Duplicated homeodomain-like superfamily protein
Zm00001d034623	1.24172	up	shaggy-like kinase 13
Zm00001d031750	1.24225	up	#N/A
Zm00001d045046	1.24254	up	LJRHL1-like 3
Zm00001d006640	1.24398	up	O-fucosyltransferase family protein
Zm00001d007597	1.24425	up	general control non-repressible 5
Zm00001d037018	1.24426	up	Protein of unknown function, DUF538
Zm00001d052987	1.24621	up	NB-ARC domain-containing disease resistance protein
Zm00001d052041	1.24914	up	Nucleotide-diphospho-sugar transferases superfamily protein
Zm00001d021446	1.25126	up	#N/A
Zm00001d023630	1.25158	up	NA
Zm00001d027802	1.2528	up	BEL1-like homeodomain 7
Zm00001d019988	1.25286	up	aspartate kinase-homoserine dehydrogenase i
Zm00001d013268	1.25318	up	Glycosyl hydrolase family protein
Zm00001d048785	1.25571	up	adenosine-5\'-phosphosulfate (APS) kinase 3
Zm00001d003847	1.256	up	Clp ATPase
Zm00001d006185	1.25626	up	NagB/RpiA/CoA transferase-like superfamily protein
Zm00001d011602	1.25665	up	evolutionarily conserved C-terminal region 8
Zm00001d043451	1.25686	up	Dynamin related protein 5A
Zm00001d039222	1.25744	up	CCT motif family protein
Zm00001d047468	1.25891	up	Golgi-body localisation protein domain ;RNA pol II promoter Fmp27 protein domain
Zm00001d046746	1.25906	up	NA
Zm00001d052810	1.26003	up	alpha/beta-Hydrolases superfamily protein
Zm00001d025818	1.26045	up	Li-tolerant lipase 1
Zm00001d022395	1.26076	up	Haloacid dehalogenase-like hydrolase (HAD) superfamily protein
Zm00001d033055	1.26279	up	NA
Zm00001d014553	1.26325	up	Protein of unknown function, DUF547
Zm00001d046501	1.26374	up	#N/A
Zm00001d044895	1.26516	up	ABC-2 type transporter family protein
Zm00001d002680	1.26679	up	phytoene desaturase 3
Zm00001d040818	1.26794	up	Esterase/lipase/thioesterase family protein
Zm00001d021599	1.26832	up	SKU5 similar 5
Zm00001d007606	1.26934	up	hydroxycinnamoyl-CoA shikimate/quinate hydroxycinnamoyl transferase
Zm00001d037784	1.27287	up	rhamnose biosynthesis 1
Zm00001d047240	1.27344	up	Plant protein of unknown function (DUF827)
Zm00001d008198	1.2737	up	myb-like transcription factor family protein
Zm00001d049821	1.27391	up	DHBP synthase RibB-like alpha/beta domain
Zm00001d053672	1.27629	up	Putative glycosyl hydrolase of unknown function (DUF1680)
Zm00001d017802	1.27696	up	histidinol phosphate aminotransferase 1
Zm00001d004339	1.27876	up	pumilio 3
Zm00001d042800	1.27879	up	NA
Zm00001d019400	1.27927	up	Bifunctional inhibitor/lipid-transfer protein/seed storage 2S albumin superfamily protein
Zm00001d046697	1.27934	up	NAD(P)-binding Rossmann-fold superfamily protein
Zm00001d005627	1.27973	up	serine carboxypeptidase-like 2
Zm00001d029932	1.28151	up	nitrate transporter 1.1
Zm00001d013527	1.28165	up	calcium-dependent protein kinase 30
Zm00001d045326	1.28214	up	phosphofructokinase 3
Zm00001d015378	1.28465	up	Single hybrid motif superfamily protein
Zm00001d038365	1.28551	up	NAD(P)-linked oxidoreductase superfamily protein
Zm00001d051923	1.28672	up	GDSL-like Lipase/Acylhydrolase superfamily protein
Zm00001d040513	1.28687	up	NA
Zm00001d038125	1.28688	up	NA
Zm00001d004036	1.2879	up	x-ray induced transcript 1
Zm00001d045919	1.28971	up	Phosphofructokinase family protein
Zm00001d003057	1.29429	up	Protein of unknown function (DUF640)
Zm00001d006920	1.29516	up	sphingoid base hydroxylase 2
Zm00001d033391	1.29568	up	NA
Zm00001d027946	1.29865	up	hydroxycinnamoyl-CoA shikimate/quinate hydroxycinnamoyl transferase
Zm00001d010877	1.30028	up	BRCT domain-containing DNA repair protein
Zm00001d020974	1.30224	up	Chitinase family protein
Zm00001d049687	1.30356	up	NAC domain containing protein 35
Zm00001d031732	1.3059	up	BCL-2-associated athanogene 3
Zm00001d003751	1.3071	up	Late embryogenesis abundant (LEA) hydroxyproline-rich glycoprotein family
Zm00001d015405	1.30911	up	aldehyde dehydrogenase 5F1
Zm00001d031060	1.30981	up	#N/A
Zm00001d053585	1.31058	up	beta galactosidase 1
Zm00001d012771	1.31143	up	tRNA/rRNA methyltransferase (SpoU) family protein
Zm00001d016156	1.31157	up	#N/A
Zm00001d020238	1.31207	up	Glucose-methanol-choline (GMC) oxidoreductase family protein
Zm00001d014885	1.31245	up	zinc knuckle (CCHC-type) family protein
Zm00001d022624	1.31284	up	NA
Zm00001d010611	1.31356	up	Minichromosome maintenance (MCM2/3/5) family protein
Zm00001d023353	1.31447	up	SOS3-interacting protein 1
Zm00001d022258	1.31473	up	Pectinacetylesterase family protein
Zm00001d042442	1.31518	up	Isoprenylcysteine carboxyl methyltransferase (ICMT) family
Zm00001d007301	1.31553	up	PDI-like 1-2
Zm00001d041775	1.31733	up	Aldolase superfamily protein
Zm00001d048696	1.31736	up	Pectin lyase-like superfamily protein
Zm00001d016542	1.31917	up	FAD/NAD(P)-binding oxidoreductase
Zm00001d027748	1.31955	up	P-loop containing nucleoside triphosphate hydrolases superfamily protein
Zm00001d032570	1.32177	up	alpha/beta-Hydrolases superfamily protein
Zm00001d025105	1.3218	up	Transcription factor IIIC, subunit 5
Zm00001d044745	1.32223	up	Alanyl-tRNA synthetase, class IIc
Zm00001d032225	1.32344	up	Actin-binding FH2 (formin homology 2) family protein
Zm00001d006203	1.32435	up	cytochrome P450, family 71, subfamily B, polypeptide 2
Zm00001d038180	1.3245	up	Major facilitator superfamily protein
Zm00001d047208	1.32594	up	nodulin MtN21 /EamA-like transporter family protein
Zm00001d013707	1.32637	up	AUX/IAA transcriptional regulator family protein
Zm00001d045667	1.32641	up	NA
Zm00001d027471	1.32859	up	FASCICLIN-like arabinogalactan-protein 10
Zm00001d043012	1.33299	up	S-adenosyl-L-methionine-dependent methyltransferases superfamily protein
Zm00001d021365	1.33592	up	DNA primases
Zm00001d011288	1.33737	up	Protein kinase protein with adenine nucleotide alpha hydrolases-like domain
Zm00001d017271	1.34019	up	adenosine kinase 2
Zm00001d049461	1.34182	up	basic helix-loop-helix (bHLH) DNA-binding superfamily protein
Zm00001d039911	1.34309	up	Di-glucose binding protein with Leucine-rich repeat domain
Zm00001d046440	1.3434	up	FAD/NAD(P)-binding oxidoreductase family protein
Zm00001d013469	1.34469	up	phosphatidylinositol-4-phosphate 5-kinase 1
Zm00001d040541	1.34489	up	indole-3-acetic acid inducible 31
Zm00001d029263	1.34788	up	chaperonin 10
Zm00001d037720	1.34873	up	alpha/beta-Hydrolases superfamily protein
Zm00001d049391	1.34978	up	Protein kinase superfamily protein
Zm00001d018151	1.35425	up	homolog of RAD54
Zm00001d041855	1.35474	up	NA
Zm00001d009820	1.35849	up	NA
Zm00001d044518	1.35887	up	NA
Zm00001d014518	1.3612	up	Protein of unknown function (DUF3511)
Zm00001d018032	1.36215	up	cellulose synthase-like A3
Zm00001d022421	1.36606	up	hydroxyproline-rich glycoprotein family protein
Zm00001d036968	1.36633	up	ATPase E1-E2 type family protein / haloacid dehalogenase-like hydrolase family protein
Zm00001d045568	1.36742	up	brassinosteroid-responsive RING-H2
Zm00001d044620	1.36782	up	NA
Zm00001d009134	1.36982	up	FAD-dependent oxidoreductase family protein
Zm00001d025571	1.36985	up	NA
Zm00001d043680	1.37292	up	alpha/beta-Hydrolases superfamily protein
Zm00001d037369	1.37464	up	movement protein binding protein 2C
Zm00001d006774	1.37731	up	hydroxyproline-rich glycoprotein family protein
Zm00001d047034	1.37862	up	AMMECR1 family
Zm00001d012231	1.37938	up	amino acid permease 8
Zm00001d044463	1.37991	up	NA
Zm00001d009693	1.38027	up	#N/A
Zm00001d023737	1.38169	up	Adenine nucleotide alpha hydrolases-like superfamily protein
Zm00001d040468	1.38246	up	zinc induced facilitator-like 1
Zm00001d045458	1.38272	up	EXORDIUM like 3
Zm00001d006739	1.38274	up	LOB domain-containing protein 38
Zm00001d052376	1.38347	up	Protein kinase superfamily protein
Zm00001d052269	1.38514	up	Auxin efflux carrier family protein
Zm00001d027368	1.38792	up	xyloglucan endotransglucosylase/hydrolase 4
Zm00001d020674	1.38819	up	potassium transporter 1
Zm00001d044823	1.38834	up	galactosyltransferase1
Zm00001d030907	1.39002	up	NA
Zm00001d013042	1.39091	up	Plant protein of unknown function (DUF868)
Zm00001d040239	1.39094	up	GDSL-like Lipase/Acylhydrolase superfamily protein
Zm00001d021731	1.39189	up	cellulose-synthase like D2
Zm00001d033278	1.39388	up	Kinase interacting (KIP1-like) family protein
Zm00001d025862	1.39588	up	threonine aldolase 1
Zm00001d036237	1.39671	up	GDSL-like Lipase/Acylhydrolase superfamily protein
Zm00001d005158	1.39677	up	Uncharacterised protein family (UPF0497)
Zm00001d048099	1.39848	up	beta glucosidase 40
Zm00001d029243	1.39948	up	Cytochrome P450 superfamily protein
Zm00001d044686	1.39962	up	lipid transfer protein 1
Zm00001d033304	1.39998	up	Transducin/WD40 repeat-like superfamily protein
Zm00001d002026	1.40119	up	Protein kinase superfamily protein
Zm00001d022053	1.40226	up	hydroxyproline-rich glycoprotein family protein
Zm00001d005241	1.40609	up	REF4-related 1
Zm00001d046802	1.4074	up	S-locus lectin protein kinase family protein
Zm00001d000197	1.41059	up	Protein of unknown function (DUF3511)
Zm00001d023801	1.41362	up	DNA polymerase alpha 2
Zm00001d029503	1.41585	up	#N/A
Zm00001d047694	1.41662	up	xylosyltransferase 1
Zm00001d029676	1.41754	up	NA
Zm00001d020443	1.41776	up	NA
Zm00001d014467	1.42123	up	Peroxidase superfamily protein
Zm00001d029721	1.42135	up	Protein kinase superfamily protein
Zm00001d044170	1.42345	up	ATP binding microtubule motor family protein
Zm00001d014093	1.42407	up	peroxisomal 3-ketoacyl-CoA thiolase 3
Zm00001d024925	1.42428	up	Protein of unknown function (DUF1295)
Zm00001d048309	1.42524	up	#N/A
Zm00001d002063	1.42531	up	UDP-glucosyl transferase 89B1
Zm00001d005478	1.42569	up	cellulose synthase 6
Zm00001d033292	1.42872	up	P-loop containing nucleoside triphosphate hydrolases superfamily protein
Zm00001d009127	1.42925	up	ATP citrate lyase subunit B 2
Zm00001d046168	1.43063	up	prephenate dehydrogenase family protein
Zm00001d046690	1.43099	up	Domain of unknown function (DUF23)
Zm00001d035694	1.43392	up	Plant protein of unknown function (DUF868)
Zm00001d006037	1.43565	up	NAD(P)-binding Rossmann-fold superfamily protein
Zm00001d005578	1.43718	up	#N/A
Zm00001d028025	1.43832	up	Protein of unknown function, DUF538
Zm00001d025853	1.44084	up	casein kinase I
Zm00001d024421	1.44119	up	4-phospho-panto-thenoylcysteine synthetase
Zm00001d007311	1.4413	up	basic helix-loop-helix (bHLH) DNA-binding superfamily protein
Zm00001d019672	1.44133	up	myo-inositol polyphosphate 5-phosphatase 2
Zm00001d029288	1.4424	up	cytochrome P450, family 709, subfamily B, polypeptide 2
Zm00001d042758	1.44464	up	NAC domain containing protein 90
Zm00001d032899	1.44483	up	calcium exchanger 7
Zm00001d043538	1.44528	up	BURP domain-containing protein
Zm00001d050475	1.44573	up	#N/A
Zm00001d005910	1.44873	up	carboxyesterase 13
Zm00001d039735	1.44924	up	NA
Zm00001d052606	1.44975	up	ovate family protein 6
Zm00001d047935	1.45465	up	Dihydrodipicolinate reductase, bacterial/plant
Zm00001d017209	1.45669	up	Plant protein of unknown function (DUF869)
Zm00001d027800	1.45842	up	Tetratricopeptide repeat (TPR)-like superfamily protein
Zm00001d004836	1.46143	up	Leucine-rich repeat protein kinase family protein
Zm00001d010094	1.4626	up	#N/A
Zm00001d006353	1.46405	up	basic helix-loop-helix (bHLH) DNA-binding superfamily protein
Zm00001d040212	1.46504	up	Protein of unknown function (DUF 3339)
Zm00001d042389	1.46549	up	#N/A
Zm00001d025338	1.46835	up	Family of unknown function (DUF662)
Zm00001d008393	1.4697	up	NA
Zm00001d051520	1.47026	up	myb domain protein 63
Zm00001d036846	1.47599	up	NA
Zm00001d018603	1.4802	up	basic helix-loop-helix (bHLH) DNA-binding superfamily protein
Zm00001d005932	1.4816	up	NAD(P)-linked oxidoreductase superfamily protein
Zm00001d005962	1.48714	up	basic leucine-zipper 3
Zm00001d017900	1.48789	up	OBF binding protein 4
Zm00001d005099	1.48973	up	mitochondrial substrate carrier family protein
Zm00001d052288	1.49553	up	DP-E2F-like 1
Zm00001d004729	1.49559	up	NA
Zm00001d047632	1.49566	up	phytochrome B
Zm00001d021820	1.49982	up	Toll-Interleukin-Resistance (TIR) domain family protein
Zm00001d032740	1.50092	up	peptide transporter 3
Zm00001d011091	1.50129	up	peroxisomal ABC transporter 1
Zm00001d008676	1.50504	up	NA
Zm00001d039867	1.50522	up	XH/XS domain-containing protein
Zm00001d010578	1.50763	up	Protein kinase superfamily protein
Zm00001d035249	1.50883	up	HXXXD-type acyl-transferase family protein
Zm00001d011036	1.51191	up	RmlC-like cupins superfamily protein
Zm00001d052770	1.51592	up	Protein of unknown function (DUF594)
Zm00001d020653	1.51896	up	zinc finger protein 8
Zm00001d029579	1.52087	up	#N/A
Zm00001d049485	1.52206	up	nuclear factor Y, subunit B3
Zm00001d019994	1.52255	up	FASCICLIN-like arabinogalactan 2
Zm00001d052083	1.52298	up	tetratricopeptide repeat (TPR)-containing protein
Zm00001d006795	1.52738	up	HXXXD-type acyl-transferase family protein
Zm00001d038526	1.53052	up	NA
Zm00001d032788	1.53151	up	GDSL-like Lipase/Acylhydrolase superfamily protein
Zm00001d004730	1.53561	up	NA
Zm00001d039754	1.53814	up	receptor like protein 7
Zm00001d044521	1.54075	up	#N/A
Zm00001d047945	1.54147	up	Ras-related small GTP-binding family protein
Zm00001d037582	1.54211	up	gamma-tubulin complex protein 2
Zm00001d044656	1.54581	up	Leucine-rich repeat protein kinase family protein
Zm00001d029234	1.55085	up	Mo25 family protein
Zm00001d003044	1.55229	up	beta glucosidase 46
Zm00001d044468	1.55374	up	maternal effect embryo arrest 18
Zm00001d008849	1.55939	up	Protein of unknown function (DUF594)
Zm00001d017952	1.56219	up	Caleosin-related family protein
Zm00001d005498	1.56241	up	guanosine nucleotide diphosphate dissociation inhibitor 1
Zm00001d030765	1.5629	up	purple acid phosphatase 27
Zm00001d033297	1.56403	up	LIM domain-containing protein
Zm00001d048958	1.56854	up	Leucine-rich repeat protein kinase family protein
Zm00001d002713	1.57115	up	VASCULAR-RELATED NAC-DOMAIN 6
Zm00001d039062	1.57148	up	timeless family protein
Zm00001d053107	1.58254	up	Tyrosine transaminase family protein
Zm00001d051397	1.59034	up	NA
Zm00001d031619	1.59194	up	microtubule-associated protein 65-8
Zm00001d027995	1.59248	up	Zinc-binding alcohol dehydrogenase family protein
Zm00001d025670	1.5946	up	PLC-like phosphodiesterase family protein
Zm00001d016733	1.59486	up	Late embryogenesis abundant (LEA) hydroxyproline-rich glycoprotein family
Zm00001d050848	1.59557	up	Myosin heavy chain-related protein
Zm00001d038258	1.60009	up	NA
Zm00001d028567	1.60262	up	DA1-related protein 2
Zm00001d032261	1.60291	up	Cyclopropane-fatty-acyl-phospholipid synthase
Zm00001d005837	1.60476	up	zinc finger protein 8
Zm00001d039140	1.60523	up	Plant basic secretory protein (BSP) family protein
Zm00001d032464	1.61268	up	Kinesin motor family protein
Zm00001d053394	1.61793	up	NA
Zm00001d013399	1.62011	up	myb domain protein 52
Zm00001d048985	1.6203	up	Protein of unknown function, DUF538
Zm00001d008878	1.62156	up	VQ motif-containing protein
Zm00001d031913	1.62689	up	Walls Are Thin 1
Zm00001d034074	1.63518	up	Glycosyl transferase, family 35
Zm00001d040061	1.63573	up	Pectinacetylesterase family protein
Zm00001d008872	1.63789	up	#N/A
Zm00001d037834	1.63887	up	phytochrome kinase substrate 4
Zm00001d031005	1.63922	up	Kinase interacting (KIP1-like) family protein
Zm00001d023305	1.64093	up	Protein of unknown function (DUF567)
Zm00001d034904	1.64279	up	#N/A
Zm00001d026038	1.64573	up	NA
Zm00001d020124	1.64659	up	NA
Zm00001d004611	1.64683	up	Acyl-CoA N-acyltransferases (NAT) superfamily protein
Zm00001d041776	1.6482	up	beta glucosidase 16
Zm00001d050918	1.66944	up	NA
Zm00001d007397	1.6699	up	natural resistance-associated macrophage protein 1
Zm00001d018720	1.67126	up	#N/A
Zm00001d017535	1.67133	up	NA
Zm00001d043766	1.67253	up	#N/A
Zm00001d026291	1.67489	up	chromomethylase 3
Zm00001d023570	1.67521	up	Disease resistance-responsive (dirigent-like protein) family protein
Zm00001d032501	1.67663	up	bifunctional nuclease i
Zm00001d027332	1.67762	up	Bifunctional inhibitor/lipid-transfer protein/seed storage 2S albumin superfamily protein
Zm00001d028330	1.67853	up	Thiamine pyrophosphate dependent pyruvate decarboxylase family protein
Zm00001d002510	1.67948	up	DNA replication helicase, putative
Zm00001d043650	1.68012	up	Pyridoxal phosphate (PLP)-dependent transferases superfamily protein
Zm00001d006365	1.6823	up	#N/A
Zm00001d029289	1.68482	up	cytochrome P450, family 709, subfamily B, polypeptide 2
Zm00001d031814	1.68748	up	phospholipase A 2A
Zm00001d018384	1.68861	up	Minichromosome maintenance (MCM2/3/5) family protein
Zm00001d045888	1.69072	up	NA
Zm00001d045519	1.69472	up	NA
Zm00001d020533	1.70297	up	Leucine-rich receptor-like protein kinase family protein
Zm00001d011548	1.7054	up	#N/A
Zm00001d049213	1.70598	up	sphingoid base hydroxylase 2
Zm00001d008381	1.70952	up	cytochrome P450, family 72, subfamily A, polypeptide 9
Zm00001d008305	1.71513	up	TRAM, LAG1 and CLN8 (TLC) lipid-sensing domain containing protein
Zm00001d038599	1.71694	up	Peroxidase superfamily protein
Zm00001d017634	1.71966	up	#N/A
Zm00001d040297	1.72066	up	ralf-like 33
Zm00001d026261	1.72473	up	Core-2/I-branching beta-1,6-N-acetylglucosaminyltransferase family protein
Zm00001d014152	1.72536	up	cationic amino acid transporter 2
Zm00001d029447	1.73176	up	Protein of unknown function (DUF581)
Zm00001d052401	1.73265	up	DNAse I-like superfamily protein
Zm00001d051194	1.73397	up	arginine decarboxylase 1
Zm00001d023311	1.74166	up	NA
Zm00001d012110	1.74207	up	Plant protein of unknown function (DUF936)
Zm00001d004758	1.75069	up	Disease resistance-responsive (dirigent-like protein) family protein
Zm00001d008715	1.75546	up	Leucine-rich receptor-like protein kinase family protein
Zm00001d024307	1.75884	up	N-acetylglucosamine-1-phosphate uridylyltransferase 1
ENSRNA049477485	1.75895	up	#N/A
Zm00001d037235	1.76541	up	Nucleotide-diphospho-sugar transferases superfamily protein
Zm00001d004208	1.77197	up	RING-H2 finger protein 2B
Zm00001d027623	1.77223	up	myb domain protein 305
Zm00001d046866	1.77494	up	tetraspanin8
Zm00001d038548	1.77577	up	LRR and NB-ARC domains-containing disease resistance protein
Zm00001d032179	1.78605	up	myb domain protein 30
Zm00001d032356	1.79575	up	wall-associated kinase 2
Zm00001d014843	1.79716	up	NAC domain containing protein 36
Zm00001d037387	1.79861	up	Protein of unknown function (DUF679)
Zm00001d024800	1.80054	up	NA
Zm00001d015759	1.81075	up	Integrase-type DNA-binding superfamily protein
Zm00001d044677	1.81458	up	NA
Zm00001d045135	1.81516	up	2-oxoglutarate (2OG) and Fe(II)-dependent oxygenase superfamily protein
Zm00001d021813	1.82202	up	cell wall protein precursor, putative
Zm00001d006297	1.82405	up	S-locus lectin protein kinase family protein
Zm00001d024027	1.8269	up	NA
Zm00001d015715	1.83272	up	NA
Zm00001d040040	1.83433	up	Heavy metal transport/detoxification superfamily protein
Zm00001d041570	1.83549	up	Eukaryotic aspartyl protease family protein
Zm00001d024471	1.83736	up	NA
Zm00001d047424	1.84758	up	cytochrome P450, family 78, subfamily A, polypeptide 7
Zm00001d047499	1.85433	up	NA
Zm00001d032520	1.86976	up	#N/A
Zm00001d038299	1.87009	up	Eukaryotic protein of unknown function (DUF914)
Zm00001d006274	1.87143	up	SAUR-like auxin-responsive protein family
Zm00001d028770	1.88187	up	Leucine-rich repeat protein kinase family protein
Zm00001d041055	1.88611	up	RING finger protein
Zm00001d020691	1.88989	up	lysm domain GPI-anchored protein 1 precursor
Zm00001d040606	1.8905	up	Galactose oxidase/kelch repeat superfamily protein
Zm00001d014970	1.89296	up	#N/A
Zm00001d038179	1.8988	up	Major facilitator superfamily protein
Zm00001d048568	1.90481	up	NA
Zm00001d004467	1.90875	up	Flavin-binding monooxygenase family protein
Zm00001d024170	1.93259	up	NA
Zm00001d020125	1.93271	up	#N/A
Zm00001d018390	1.94857	up	RING/U-box superfamily protein
Zm00001d003142	1.95356	up	cytochrome P450, family 71, subfamily A, polypeptide 22
Zm00001d051102	1.95653	up	Leucine-rich repeat (LRR) family protein
Zm00001d010422	1.95832	up	Pollen Ole e 1 allergen and extensin family protein
Zm00001d047932	1.95942	up	NA
Zm00001d028967	1.96746	up	ARF GAP-like zinc finger-containing protein ZIGA4
Zm00001d051513	1.96831	up	ubiquitin-specific protease 21
Zm00001d019850	1.97029	up	fatty acid reductase 1
Zm00001d014888	1.97156	up	#N/A
Zm00001d016885	1.97644	up	Protein of unknown function (DUF3537)
Zm00001d047125	1.98447	up	Pectinacetylesterase family protein
Zm00001d005939	1.99532	up	basic helix-loop-helix (bHLH) DNA-binding superfamily protein
Zm00001d021528	1.99546	up	TRAF-like superfamily protein
Zm00001d010373	2.00882	up	HAD superfamily, subfamily IIIB acid phosphatase
Zm00001d006585	2.0103	up	MYB-like 102
Zm00001d048352	2.01327	up	IQ-domain 20
Zm00001d025322	2.01802	up	#N/A
Zm00001d004015	2.02263	up	NA
Zm00001d051492	2.03	up	Protein of unknown function (DUF581)
Zm00001d003353	2.04498	up	Heavy metal transport/detoxification superfamily protein
Zm00001d044520	2.05467	up	ABL interactor-like protein 2
Zm00001d025255	2.06216	up	cysteine-rich RLK (RECEPTOR-like protein kinase) 29
Zm00001d006116	2.07201	up	PEBP (phosphatidylethanolamine-binding protein) family protein
Zm00001d007653	2.07745	up	laccase 7
Zm00001d049113	2.0833	up	Cysteine proteinases superfamily protein
Zm00001d028348	2.09077	up	Peroxidase superfamily protein
Zm00001d019334	2.09284	up	receptor lectin kinase
Zm00001d023924	2.09521	up	#N/A
Zm00001d052788	2.1016	up	NA
Zm00001d008722	2.11052	up	NA
Zm00001d009187	2.11539	up	NA
Zm00001d051333	2.12025	up	uclacyanin 1
Zm00001d023050	2.12026	up	#N/A
Zm00001d011470	2.1213	up	Zinc finger C-x8-C-x5-C-x3-H type family protein
Zm00001d005001	2.12326	up	zinc induced facilitator-like 1
Zm00001d052625	2.12455	up	Galactosyl transferase GMA12/MNN10 family protein
Zm00001d012789	2.12475	up	WRKY DNA-binding protein 24
Zm00001d028151	2.14132	up	polyol/monosaccharide transporter 5
Zm00001d050705	2.14285	up	NA
Zm00001d049616	2.14319	up	glycerol-3-phosphate acyltransferase 6
Zm00001d049421	2.14583	up	RmlC-like cupins superfamily protein
Zm00001d033466	2.15094	up	Lateral organ boundaries (LOB) domain family protein
Zm00001d030222	2.15164	up	NA
Zm00001d031806	2.15289	up	NA
Zm00001d027979	2.15463	up	purine permease 3
Zm00001d039392	2.15476	up	cationic amino acid transporter 5
Zm00001d036781	2.16636	up	NA
Zm00001d052336	2.17071	up	#N/A
Zm00001d007935	2.17074	up	Disease resistance-responsive (dirigent-like protein) family protein
Zm00001d048861	2.17505	up	flavin-dependent monooxygenase 1
Zm00001d031261	2.17541	up	RING/U-box superfamily protein
Zm00001d044685	2.19104	up	lipid transfer protein 3
Zm00001d022120	2.20438	up	alpha/beta-Hydrolases superfamily protein
Zm00001d004621	2.21777	up	peptide transporter 2
Zm00001d002042	2.22575	up	Peroxidase superfamily protein
Zm00001d030037	2.22616	up	ATPase family associated with various cellular activities (AAA)
Zm00001d047829	2.22724	up	Protein of unknown function (DUF668)
Zm00001d051410	2.23864	up	NA
Zm00001d000400	2.24574	up	#N/A
Zm00001d025205	2.24839	up	FER-like regulator of iron uptake
Zm00001d053007	2.25009	up	NA
Zm00001d016522	2.26783	up	#N/A
Zm00001d020405	2.2681	up	myb domain protein 20
Zm00001d048608	2.26833	up	TRICHOME BIREFRINGENCE-LIKE 27
Zm00001d035163	2.28494	up	lysine histidine transporter 1
Zm00001d026268	2.30461	up	HXXXD-type acyl-transferase family protein
Zm00001d028696	2.33652	up	NA
Zm00001d032643	2.3606	up	NA
Zm00001d028591	2.36694	up	Eukaryotic aspartyl protease family protein
Zm00001d028871	2.39797	up	#N/A
Zm00001d048694	2.40248	up	Protein of unknown function (DUF581)
Zm00001d006283	2.40889	up	SAUR-like auxin-responsive protein family
Zm00001d009402	2.41132	up	Dynein light chain type 1 family protein
Zm00001d053689	2.41166	up	NA
Zm00001d009599	2.4152	up	RAD-like 1
Zm00001d025299	2.4585	up	NA
Zm00001d009167	2.46717	up	Pectin lyase-like superfamily protein
Zm00001d038029	2.47844	up	Nuclear transport factor 2 (NTF2) family protein
Zm00001d027636	2.48086	up	Disease resistance-responsive (dirigent-like protein) family protein
Zm00001d032823	2.48181	up	NA
Zm00001d039713	2.4826	up	tonoplast intrinsic protein 4;1
Zm00001d016415	2.48577	up	UDP-glucosyl transferase 73C1
Zm00001d002055	2.48677	up	NA
Zm00001d012568	2.49501	up	beta-1,3-glucanase 4
Zm00001d043283	2.54305	up	#N/A
Zm00001d009382	2.54975	up	Late embryogenesis abundant protein
Zm00001d024637	2.55215	up	receptor lectin kinase
Zm00001d038503	2.5576	up	Leucine-rich repeat protein kinase family protein
Zm00001d018773	2.55877	up	NAC domain containing protein 42
Zm00001d018323	2.56018	up	CAP (Cysteine-rich secretory proteins, Antigen 5, and Pathogenesis-related 1 protein) superfamily protein
Zm00001d032318	2.56732	up	NA
Zm00001d001004	2.58554	up	#N/A
Zm00001d021254	2.58666	up	#N/A
Zm00001d032104	2.58741	up	cyclase associated protein 1
Zm00001d023932	2.60625	up	#N/A
Zm00001d024414	2.61425	up	Late Embryogenesis Abundant 4-5
Zm00001d036922	2.62249	up	HXXXD-type acyl-transferase family protein
Zm00001d026509	2.64341	up	NA
Zm00001d020605	2.67865	up	SAUR-like auxin-responsive protein family
Zm00001d002590	2.68063	up	SPIRAL1-like2
Zm00001d015925	2.69624	up	AGC kinase 1.5
Zm00001d029520	2.71978	up	#N/A
Zm00001d027682	2.72524	up	nodulin MtN21 /EamA-like transporter family protein
Zm00001d008933	2.73137	up	NA
Zm00001d029135	2.73333	up	Nodulin MtN3 family protein
Zm00001d030507	2.74002	up	nodulin MtN21 /EamA-like transporter family protein
Zm00001d046491	2.74597	up	Zinc-binding dehydrogenase family protein
Zm00001d040120	2.76742	up	#N/A
Zm00001d048711	2.77071	up	UDP-glucosyl transferase 72B3
Zm00001d006009	2.77599	up	FASCICLIN-like arabinoogalactan 7
Zm00001d050048	2.77888	up	#N/A
Zm00001d014989	2.78327	up	myb domain protein 86
Zm00001d026679	2.82085	up	#N/A
Zm00001d015744	2.83219	up	Galactose oxidase/kelch repeat superfamily protein
Zm00001d022608	2.83875	up	#N/A
Zm00001d052223	2.84063	up	NA
Zm00001d035537	2.84993	up	#N/A
Zm00001d046997	2.85017	up	#N/A
Zm00001d033062	2.91271	up	MATE efflux family protein
Zm00001d041782	2.91905	up	Protein of unknown function (DUF579)
Zm00001d049989	2.93474	up	HXXXD-type acyl-transferase family protein
Zm00001d006516	2.94208	up	Late embryogenesis abundant (LEA) hydroxyproline-rich glycoprotein family
Zm00001d006149	3.01201	up	#N/A
Zm00001d003954	3.01258	up	Major facilitator superfamily protein
Zm00001d012476	3.05107	up	GDSL-like Lipase/Acylhydrolase family protein
Zm00001d016301	3.11057	up	Pyridoxal phosphate phosphatase-related protein
Zm00001d031510	3.11859	up	Protein of unknown function, DUF599
Zm00001d015470	3.13287	up	glutamine dumper 1
Zm00001d049423	3.20062	up	RmlC-like cupins superfamily protein
Zm00001d050908	3.22513	up	NA
Zm00001d050140	3.23112	up	Protein of unknown function (DUF707)
Zm00001d052876	3.26165	up	Major facilitator superfamily protein
Zm00001d014680	3.26497	up	high-affinity K+ transporter 1
Zm00001d029270	3.35774	up	#N/A
Zm00001d026140	3.49131	up	Subtilase family protein
Zm00001d004687	3.5739	up	#N/A
Zm00001d041377	3.59077	up	#N/A
Zm00001d012780	3.59077	up	UDP-glucosyl transferase 71B6
Zm00001d043211	3.61341	up	Subtilase family protein
Zm00001d026648	3.64379	up	nuclear factor Y, subunit C2
Zm00001d036066	3.66209	up	Zinc finger (C3HC4-type RING finger) family protein
Zm00001d014285	3.7168	up	plasma membrane intrinsic protein 2
Zm00001d028917	3.84853	up	NA
Zm00001d032884	3.86563	up	expansin 11
Zm00001d044135	3.86563	up	#N/A
Zm00001d049220	3.87493	up	ROP-interactive CRIB motif-containing protein 10
Zm00001d018580	3.94473	up	exocyst subunit exo70 family protein H2
Zm00001d037092	4.02356	up	terpene synthase 21
Zm00001d011157	4.03735	up	cysteine-rich RLK (RECEPTOR-like protein kinase) 2
Zm00001d053163	4.05635	up	RGA-like 2
Zm00001d027855	4.19242	up	BANQUO 3
Zm00001d036955	4.22346	up	ACC oxidase 1
Zm00001d047877	4.22346	up	Protein of unknown function (DUF3049)
Zm00001d030494	4.35328	up	HXXXD-type acyl-transferase family protein
Zm00001d052032	4.35802	up	lysyl-tRNA synthetase 1
Zm00001d047512	4.41352	up	NA
Zm00001d050911	4.4837	up	#N/A
Zm00001d018816	4.62798	up	C2H2 and C2HC zinc fingers superfamily protein
Zm00001d051739	4.8107	up	basic leucine-zipper 42
Zm00001d052818	4.84149	up	#N/A
Zm00001d045570	4.85696	up	Phosphoglycerate mutase family protein
Zm00001d048141	4.94528	up	basic helix-loop-helix (bHLH) DNA-binding superfamily protein
Zm00001d039970	5.02713	up	Core-2/I-branching beta-1,6-N-acetylglucosaminyltransferase family protein
Zm00001d048260	5.03795	up	#N/A
Zm00001d025041	5.20968	up	#N/A
Zm00001d025949	5.40126	up	Vacuolar iron transporter (VIT) family protein
Zm00001d008300	5.43583	up	Peroxidase superfamily protein
Zm00001d004234	5.70025	up	homeodomain GLABROUS 1
Zm00001d049690	5.75018	up	cytochrome P450, family 87, subfamily A, polypeptide 6
Zm00001d039101	5.7916	up	Zinc finger C-x8-C-x5-C-x3-H type family protein
Zm00001d008331	6.07812	up	cinnamoyl coa reductase 1
Zm00001d048870	6.5316	up	hydroxycinnamoyl-CoA shikimate/quinate hydroxycinnamoyl transferase
Zm00001d020960	7.32102	up	NAD(P)-binding Rossmann-fold superfamily protein

## Sheet: Table S4
Table S4 Specially expressed DEGs in RILbro-W22 seedlings under non-treated and salt-treated
geneID	log2FoldChange	up or down	annotation
Zm00001d021266	-6.59801	down	BON association protein 2
ENSRNA049478482	-6.59735	down	#N/A
ENSRNA049478963	-6.4377	down	#N/A
ZeamMp097	-5.67529	down	#N/A
Zm00001d048064	-5.27018	down	NA
Zm00001d027974	-4.97018	down	#N/A
Zm00001d020750	-4.86878	down	serine carboxypeptidase-like 28
Zm00001d006188	-4.71353	down	#N/A
Zm00001d000016	-4.5747	down	fatty acid desaturase A
ENSRNA049457201	-4.57115	down	#N/A
ENSRNA049478126	-4.52437	down	#N/A
Zm00001d034552	-4.3878	down	Pectin lyase-like superfamily protein
ENSRNA049478584	-4.22309	down	#N/A
ENSRNA049478891	-4.1973	down	#N/A
ENSRNA049479875	-4.18533	down	#N/A
Zm00001d018164	-4.17535	down	#N/A
ENSRNA049478239	-3.89677	down	#N/A
ENSRNA049457503	-3.89677	down	#N/A
ENSRNA049478487	-3.70214	down	#N/A
Zm00001d027004	-3.67674	down	#N/A
Zm00001d029766	-3.59459	down	#N/A
Zm00001d024697	-3.57316	down	receptor like protein 50
Zm00001d046817	-3.56045	down	#N/A
ENSRNA049478649	-3.49401	down	#N/A
Zm00001d027955	-3.4839	down	#N/A
ENSRNA049479579	-3.33711	down	#N/A
Zm00001d043346	-3.17309	down	calmodulin-like 41
ZeamMp044	-3.1176	down	#N/A
Zm00001d003994	-3.10674	down	deoxyhypusine synthase
Zm00001d049218	-3.07063	down	Outward rectifying potassium channel protein
Zm00001d019844	-3.03711	down	#N/A
ENSRNA049478748	-2.99108	down	#N/A
Zm00001d002743	-2.88353	down	NA
ENSRNA049479014	-2.84829	down	#N/A
ZeamMp159	-2.83187	down	#N/A
Zm00001d005543	-2.71203	down	DNAJ homologue 3
Zm00001d014401	-2.7104	down	#N/A
Zm00001d000259	-2.66905	down	#N/A
Zm00001d052014	-2.66724	down	#N/A
Zm00001d012754	-2.65342	down	#N/A
Zm00001d039990	-2.63217	down	Ribosomal protein S25 family protein
Zm00001d011268	-2.56843	down	NA
Zm00001d017404	-2.54588	down	RING/U-box superfamily protein
Zm00001d000417	-2.52698	down	photosystem II reaction center protein A
Zm00001d020919	-2.472	down	#N/A
Zm00001d047509	-2.44805	down	Stabilizer of iron transporter SufD / Polynucleotidyl transferase
Zm00001d047591	-2.40166	down	sigma factor binding protein 1
ENSRNA049478956	-2.39901	down	#N/A
Zm00001d018402	-2.39663	down	reversibly glycosylated polypeptide 1
Zm00001d040786	-2.35506	down	NA
Zm00001d051472	-2.28114	down	Heavy metal transport/detoxification superfamily protein
Zm00001d026595	-2.27764	down	early nodulin-like protein 5
Zm00001d050250	-2.2747	down	NA
ZeamMp095	-2.24387	down	#N/A
Zm00001d021035	-2.23483	down	#N/A
Zm00001d017385	-2.22148	down	myb domain protein 17
Zm00001d050836	-2.14588	down	#N/A
Zm00001d024842	-2.09024	down	Auxin efflux carrier family protein
Zm00001d034301	-2.08973	down	NA
Zm00001d011707	-2.07663	down	Leucine-rich repeat protein kinase family protein
Zm00001d023298	-2.06595	down	apyrase 2
Zm00001d048611	-2.06204	down	#N/A
Zm00001d023327	-2.04406	down	#N/A
Zm00001d021826	-2.00065	down	GRAS family transcription factor
Zm00001d024595	-1.9889	down	Cupredoxin superfamily protein
Zm00001d005454	-1.98534	down	NA
Zm00001d007411	-1.98433	down	NA
Zm00001d037316	-1.96419	down	#N/A
Zm00001d044153	-1.96299	down	cytochrome P450, family 72, subfamily A, polypeptide 14
Zm00001d024154	-1.95534	down	guanyl-nucleotide exchange factors;GTPase binding;GTP binding
Zm00001d021451	-1.94785	down	#N/A
Zm00001d045393	-1.93714	down	#N/A
Zm00001d028838	-1.93265	down	NA
Zm00001d012741	-1.92135	down	#N/A
Zm00001d043215	-1.90653	down	actin-related protein C3
ENSRNA049478207	-1.90611	down	#N/A
Zm00001d052795	-1.90436	down	Myosin heavy chain-related protein
Zm00001d025392	-1.87849	down	#N/A
Zm00001d025579	-1.87693	down	#N/A
Zm00001d014492	-1.87391	down	#N/A
Zm00001d001936	-1.8639	down	myb-like HTH transcriptional regulator family protein
Zm00001d017813	-1.86157	down	HSP20-like chaperones superfamily protein
Zm00001d014628	-1.85936	down	Homeobox-leucine zipper protein family
Zm00001d015481	-1.85179	down	Ribosomal protein S4 (RPS4A) family protein
Zm00001d043990	-1.83872	down	Calcium-dependent lipid-binding (CaLB domain) family protein
Zm00001d041330	-1.83632	down	NA
Zm00001d011752	-1.82033	down	Protein of unknown function, DUF584
Zm00001d043413	-1.81275	down	NA
Zm00001d026923	-1.80171	down	#N/A
Zm00001d022889	-1.80031	down	#N/A
Zm00001d013502	-1.79741	down	NA
Zm00001d040029	-1.79604	down	NA
Zm00001d032098	-1.79052	down	Protein of unknown function (DUF581)
Zm00001d045567	-1.78952	down	nodulin MtN21 /EamA-like transporter family protein
Zm00001d000141	-1.7879	down	Protein of unknown function (DUF1645)
Zm00001d034046	-1.78521	down	#N/A
ENSRNA049458208	-1.78486	down	#N/A
Zm00001d017135	-1.78358	down	AGC (cAMP-dependent, cGMP-dependent and protein kinase C) kinase family protein
Zm00001d036837	-1.779	down	#N/A
Zm00001d024014	-1.77732	down	Zinc finger (C3HC4-type RING finger) family protein
Zm00001d040659	-1.77459	down	senescence-associated gene 21
Zm00001d025365	-1.7716	down	#N/A
Zm00001d007319	-1.76956	down	Subtilase family protein
Zm00001d025846	-1.76245	down	beta-glucosidase 47
Zm00001d023183	-1.75415	down	#N/A
Zm00001d025218	-1.75199	down	HCP-like superfamily protein with MYND-type zinc finger
Zm00001d014261	-1.75158	down	NA
Zm00001d037358	-1.74832	down	#N/A
Zm00001d012415	-1.74774	down	Eukaryotic aspartyl protease family protein
Zm00001d008153	-1.73001	down	#N/A
Zm00001d046737	-1.72562	down	#N/A
Zm00001d045478	-1.71693	down	histone H1-3
Zm00001d018327	-1.7152	down	#N/A
Zm00001d018006	-1.71053	down	Serine/threonine-protein kinase WNK (With No Lysine)-related
Zm00001d030513	-1.70951	down	related to AP2 4
Zm00001d027710	-1.6943	down	Peroxidase superfamily protein
Zm00001d003229	-1.69255	down	ARM repeat superfamily protein
Zm00001d009757	-1.6913	down	#N/A
Zm00001d008092	-1.69012	down	#N/A
Zm00001d002096	-1.6889	down	Sterile alpha motif (SAM) domain-containing protein
Zm00001d018237	-1.68677	down	Plant protein of unknown function (DUF828)
Zm00001d032962	-1.68155	down	Protein of unknown function, DUF593
Zm00001d035097	-1.68089	down	Leucine-rich repeat protein kinase family protein
Zm00001d029233	-1.67503	down	NA
Zm00001d025367	-1.67286	down	#N/A
Zm00001d005895	-1.67014	down	calmodulin-like 11
Zm00001d050186	-1.6693	down	#N/A
Zm00001d015451	-1.66722	down	squamosa promoter binding protein-like 8
Zm00001d002274	-1.66424	down	Remorin family protein
Zm00001d045728	-1.63849	down	NSP-interacting kinase 2
Zm00001d011187	-1.63485	down	basic helix-loop-helix (bHLH) DNA-binding superfamily protein
Zm00001d052938	-1.63186	down	phosphoribosylformylglycinamidine cyclo-ligase, chloroplast / phosphoribosyl-aminoimidazole synthetase / AIR synthase (PUR5)
Zm00001d005658	-1.62132	down	Haloacid dehalogenase-like hydrolase (HAD) superfamily protein
Zm00001d021082	-1.59927	down	#N/A
Zm00001d017789	-1.5886	down	NA
Zm00001d008862	-1.58751	down	cytokinin oxidase 5
Zm00001d023804	-1.58118	down	NA
Zm00001d038486	-1.57674	down	thioredoxin H-type 9
Zm00001d020584	-1.56957	down	Histone superfamily protein
Zm00001d052192	-1.56949	down	basic helix-loop-helix (bHLH) DNA-binding superfamily protein
Zm00001d047350	-1.56826	down	Alpha/beta hydrolase related protein
Zm00001d007191	-1.56809	down	myb domain protein 112
Zm00001d052026	-1.56313	down	Integrase-type DNA-binding superfamily protein
Zm00001d042094	-1.56269	down	Plant calmodulin-binding protein-related
Zm00001d023411	-1.56041	down	myb-like transcription factor family protein
Zm00001d012350	-1.55634	down	Protein of unknown function (DUF740)
Zm00001d042898	-1.55407	down	#N/A
Zm00001d038618	-1.55357	down	NA
ENSRNA049455651	-1.55346	down	#N/A
Zm00001d037923	-1.55252	down	guanylyl cyclase 1
Zm00001d004910	-1.55122	down	NA
Zm00001d023675	-1.54258	down	#N/A
ENSRNA049473076	-1.54037	down	#N/A
Zm00001d026143	-1.53884	down	NA
Zm00001d042880	-1.53876	down	Regulator of chromosome condensation (RCC1) family protein
Zm00001d017592	-1.5379	down	C-repeat/DRE binding factor 2
Zm00001d010653	-1.53606	down	#N/A
Zm00001d002111	-1.53027	down	#N/A
Zm00001d040660	-1.5192	down	senescence-associated gene 21
Zm00001d048769	-1.51552	down	#N/A
Zm00001d016076	-1.50899	down	NA
Zm00001d039378	-1.50675	down	NA
Zm00001d010849	-1.50581	down	NA
Zm00001d020828	-1.50452	down	#N/A
Zm00001d006212	-1.50371	down	pseudo-response regulator 9
Zm00001d032565	-1.50201	down	end binding protein 1C
Zm00001d006106	-1.50111	down	NAC domain containing protein 41
Zm00001d046891	-1.49922	down	NA
Zm00001d006874	-1.49848	down	F-box family protein
Zm00001d049157	-1.49794	down	Octicosapeptide/Phox/Bem1p family protein
Zm00001d017619	-1.49525	down	NA
Zm00001d013150	-1.49181	down	#N/A
Zm00001d036341	-1.49153	down	RNI-like superfamily protein
Zm00001d015737	-1.49011	down	Ran BP2/NZF zinc finger-like superfamily protein
Zm00001d001709	-1.49011	down	#N/A
Zm00001d027394	-1.48517	down	Histone superfamily protein
Zm00001d024594	-1.48324	down	Cupredoxin superfamily protein
Zm00001d017539	-1.48029	down	mechanosensitive channel of small conductance-like 5
Zm00001d008001	-1.4783	down	#N/A
Zm00001d046805	-1.47548	down	WRKY DNA-binding protein 40
Zm00001d027509	-1.46692	down	Protein kinase superfamily protein
Zm00001d048077	-1.45884	down	#N/A
Zm00001d046286	-1.45818	down	NA
Zm00001d025246	-1.45808	down	#N/A
Zm00001d030079	-1.45594	down	NA
Zm00001d013440	-1.4452	down	high mobility group A5
Zm00001d012041	-1.44495	down	NA
Zm00001d049684	-1.44472	down	IQ-domain 17
Zm00001d022401	-1.44365	down	Protein with RING/U-box and TRAF-like domains
Zm00001d004857	-1.43968	down	VIRE2-interacting protein 1
Zm00001d017557	-1.43858	down	Transmembrane amino acid transporter family protein
Zm00001d051484	-1.43424	down	SBP (S-ribonuclease binding protein) family protein
Zm00001d016136	-1.43289	down	RING/U-box superfamily protein
Zm00001d009985	-1.42889	down	EF hand calcium-binding protein family
Zm00001d013760	-1.42752	down	Major facilitator superfamily protein
Zm00001d043371	-1.42606	down	NA
Zm00001d028512	-1.42554	down	phosphatidylinositol-4-phosphate 5-kinase 2
Zm00001d028676	-1.42546	down	NA
Zm00001d004088	-1.42509	down	NA
Zm00001d051235	-1.41982	down	NA
Zm00001d028401	-1.41977	down	like AUXIN RESISTANT 2
Zm00001d021205	-1.41291	down	C-repeat-binding factor 4
Zm00001d022251	-1.40908	down	RAB GTPase homolog A5A
Zm00001d032175	-1.40829	down	zinc finger homeodomain 1
Zm00001d048316	-1.40588	down	NA
Zm00001d053143	-1.40495	down	amino acid permease 2
Zm00001d048201	-1.40449	down	myo-inositol-1-phosphate synthase 1
Zm00001d047386	-1.40042	down	NA
Zm00001d002451	-1.39866	down	NA
Zm00001d023566	-1.39859	down	#N/A
Zm00001d034674	-1.39649	down	Major facilitator superfamily protein
Zm00001d022509	-1.39535	down	NA
Zm00001d013489	-1.395	down	#N/A
Zm00001d033675	-1.39354	down	NA
Zm00001d027874	-1.38818	down	nuclear factor Y, subunit A3
Zm00001d032304	-1.38671	down	zinc finger (C3HC4-type RING finger) family protein / BRCT domain-containing protein
Zm00001d020911	-1.38573	down	#N/A
Zm00001d013177	-1.38565	down	Protein of unknown function, DUF547
Zm00001d015289	-1.38548	down	RING/U-box superfamily protein
Zm00001d036490	-1.37881	down	purple acid phosphatase 28
Zm00001d016445	-1.37774	down	#N/A
Zm00001d049469	-1.37413	down	#N/A
Zm00001d039492	-1.37184	down	NA
Zm00001d039110	-1.37164	down	EF hand calcium-binding protein family
Zm00001d047211	-1.36415	down	metacaspase 1
Zm00001d005458	-1.36154	down	ferredoxin-NADP(+)-oxidoreductase 2
Zm00001d051798	-1.36109	down	NA
Zm00001d051692	-1.35731	down	Eukaryotic aspartyl protease family protein
Zm00001d005783	-1.35658	down	#N/A
Zm00001d027449	-1.35565	down	embryo defective 2170
Zm00001d045105	-1.35506	down	WRKY family transcription factor
Zm00001d014515	-1.35458	down	GDP dissociation inhibitor family protein / Rab GTPase activator family protein
Zm00001d028284	-1.35342	down	Protein of unknown function, DUF547
Zm00001d011451	-1.34988	down	Protein of unknown function (DUF1645)
Zm00001d032935	-1.34972	down	DNAse I-like superfamily protein
Zm00001d033897	-1.34796	down	NA
Zm00001d014562	-1.34523	down	IAA-leucine resistant (ILR)-like gene 6
Zm00001d002878	-1.34426	down	Protein of unknown function (DUF167)
Zm00001d005928	-1.34122	down	CYCLIN D4;1
Zm00001d013506	-1.33928	down	NA
Zm00001d042923	-1.33854	down	HVA22-like protein K
Zm00001d013465	-1.33835	down	GRAS family transcription factor family protein
Zm00001d035082	-1.33649	down	cellulase 2
Zm00001d015817	-1.33647	down	Ribosomal protein S4 (RPS4A) family protein
Zm00001d038087	-1.3362	down	Integrase-type DNA-binding superfamily protein
Zm00001d039848	-1.33554	down	NAD(P)-binding Rossmann-fold superfamily protein
Zm00001d035765	-1.33433	down	NA
Zm00001d047461	-1.33289	down	Tetratricopeptide repeat (TPR)-like superfamily protein
Zm00001d039617	-1.33264	down	P-loop nucleoside triphosphate hydrolases superfamily protein with CH (Calponin Homology) domain
Zm00001d026289	-1.33133	down	K+ uptake permease 10
Zm00001d041222	-1.33059	down	#N/A
Zm00001d047282	-1.32939	down	SPIRAL1-like1
Zm00001d019268	-1.32842	down	Protein of unknown function (DUF300)
Zm00001d035197	-1.32563	down	Tetratricopeptide repeat (TPR)-like superfamily protein
Zm00001d038706	-1.32234	down	NA
Zm00001d032654	-1.32189	down	NA
Zm00001d002842	-1.32113	down	Remorin family protein
Zm00001d037780	-1.32011	down	hAT transposon superfamily protein
Zm00001d049075	-1.31898	down	UDP-glucose pyrophosphorylase 2
Zm00001d002160	-1.31891	down	Wound-responsive family protein
Zm00001d050905	-1.31805	down	Dynein light chain type 1 family protein
Zm00001d033325	-1.31758	down	cycling DOF factor 2
Zm00001d003833	-1.31536	down	NA
Zm00001d001700	-1.31429	down	#N/A
Zm00001d035309	-1.31148	down	NA
Zm00001d026062	-1.30905	down	GDSL-like Lipase/Acylhydrolase superfamily protein
Zm00001d050950	-1.30637	down	#N/A
Zm00001d005874	-1.30612	down	NA
Zm00001d022491	-1.30545	down	recovery protein 3
Zm00001d050056	-1.30313	down	Splicing factor 3B subunit 5/RDS3 complex subunit 10
Zm00001d000154	-1.30045	down	NA
Zm00001d034978	-1.29988	down	Heavy metal transport/detoxification superfamily protein
Zm00001d037792	-1.29961	down	Protein of unknown function (DUF620)
Zm00001d038552	-1.29836	down	NA
Zm00001d022355	-1.29744	down	NA
Zm00001d029461	-1.29716	down	Protein of unknown function (DUF300)
Zm00001d024783	-1.29692	down	phytochrome interacting factor 3
Zm00001d014348	-1.2936	down	#N/A
Zm00001d018746	-1.29248	down	#N/A
Zm00001d054094	-1.29058	down	Glutaredoxin family protein
Zm00001d022457	-1.28976	down	Peroxidase superfamily protein
Zm00001d034651	-1.28638	down	OBF-binding protein 3
Zm00001d012232	-1.28476	down	#N/A
Zm00001d021961	-1.28434	down	NA
Zm00001d033887	-1.28364	down	#N/A
Zm00001d052118	-1.28028	down	zinc finger protein 8
Zm00001d017041	-1.27972	down	#N/A
Zm00001d049480	-1.27932	down	#N/A
Zm00001d004848	-1.27701	down	Protein of unknown function (DUF793)
Zm00001d006210	-1.27623	down	galacturonosyltransferase 1
Zm00001d035766	-1.2759	down	Polynucleotidyl transferase, ribonuclease H-like superfamily protein
Zm00001d016855	-1.27487	down	chloride channel C
Zm00001d002069	-1.27142	down	NA
Zm00001d053528	-1.27118	down	NA
Zm00001d020572	-1.27002	down	NA
Zm00001d040392	-1.26747	down	titan9
Zm00001d017412	-1.26401	down	B-box zinc finger family protein
Zm00001d027854	-1.26173	down	sucrose transporter 2
Zm00001d052027	-1.25901	down	NA
Zm00001d040260	-1.25896	down	#N/A
Zm00001d038408	-1.25447	down	NA
Zm00001d042503	-1.25406	down	Protein of unknown function (DUF1685)
Zm00001d008919	-1.25197	down	TCP family transcription factor 4
Zm00001d049308	-1.25192	down	NA
Zm00001d017293	-1.24972	down	low-molecular-weight cysteine-rich 69
Zm00001d019531	-1.2484	down	TLD-domain containing nucleolar protein
Zm00001d002678	-1.24747	down	Prolyl oligopeptidase family protein
Zm00001d035783	-1.24682	down	Heavy metal transport/detoxification superfamily protein
Zm00001d018061	-1.24674	down	shikimate kinase 1
Zm00001d018655	-1.24646	down	#N/A
Zm00001d023735	-1.24602	down	SPIRAL1-like2
Zm00001d010586	-1.24592	down	#N/A
Zm00001d018642	-1.24431	down	Transducin/WD40 repeat-like superfamily protein
Zm00001d051749	-1.24399	down	homeobox 1
Zm00001d044285	-1.24317	down	calcineurin B-like protein 10
Zm00001d034650	-1.24256	down	SEC14 cytosolic factor family protein / phosphoglyceride transfer family protein
Zm00001d035463	-1.2422	down	#N/A
Zm00001d048801	-1.24218	down	ELF4-like 3
Zm00001d029114	-1.24217	down	NA
Zm00001d028062	-1.24146	down	Uncharacterised protein family (UPF0497)
Zm00001d042582	-1.23942	down	alfin-like 3
Zm00001d047726	-1.23691	down	DNAJ heat shock N-terminal domain-containing protein
Zm00001d042307	-1.23487	down	NA
Zm00001d008844	-1.23207	down	NA
Zm00001d031539	-1.23048	down	S-adenosyl-L-methionine-dependent methyltransferases superfamily protein
Zm00001d054049	-1.22828	down	NA
Zm00001d008700	-1.22827	down	tryptophan aminotransferase related 2
Zm00001d017264	-1.22784	down	wall associated kinase 5
Zm00001d050704	-1.22746	down	Nuclear pore localisation protein NPL4
Zm00001d035288	-1.22456	down	Ribosome associated membrane protein RAMP4
Zm00001d031459	-1.22221	down	nuclear RNA polymerase D1A
Zm00001d010183	-1.2219	down	NA
Zm00001d014481	-1.2204	down	NAD(P)-binding Rossmann-fold superfamily protein
Zm00001d017721	-1.21995	down	Tudor/PWWP/MBT superfamily protein
Zm00001d023465	-1.2198	down	E2F transcription factor 3
Zm00001d011035	-1.21972	down	dehydroascorbate reductase 2
Zm00001d028601	-1.21777	down	Haloacid dehalogenase-like hydrolase (HAD) superfamily protein
Zm00001d044301	-1.21727	down	homology to ABI2
Zm00001d021882	-1.2149	down	NA
Zm00001d008325	-1.21455	down	flowering promoting factor 1
Zm00001d032687	-1.21138	down	#N/A
Zm00001d016520	-1.21074	down	winged-helix DNA-binding transcription factor family protein
Zm00001d028055	-1.21056	down	RING/U-box superfamily protein
Zm00001d007227	-1.21005	down	NA
Zm00001d037426	-1.20819	down	NA
Zm00001d052878	-1.20766	down	NA
Zm00001d015399	-1.20744	down	phosphorylcholine cytidylyltransferase
Zm00001d022131	-1.20625	down	20S proteasome subunit PAA2
Zm00001d040672	-1.20594	down	SERINE-ARGININE PROTEIN 30
Zm00001d024281	-1.20485	down	polyamine oxidase 1
Zm00001d006358	-1.20214	down	NA
Zm00001d039064	-1.20192	down	#N/A
Zm00001d015513	-1.20045	down	cinnamoyl coa reductase 1
Zm00001d014083	-1.19965	down	beta-amylase 1
Zm00001d050368	-1.19803	down	high mobility group A
Zm00001d038805	-1.19679	down	YebC-related
Zm00001d011512	-1.19649	down	associated molecule with the SH3 domain of STAM 2
Zm00001d002584	-1.19557	down	NA
Zm00001d048137	-1.19551	down	#N/A
Zm00001d023659	-1.19279	down	auxin response factor 2
Zm00001d045951	-1.19241	down	Paired amphipathic helix (PAH2) superfamily protein
Zm00001d006354	-1.19172	down	NA
Zm00001d003516	-1.19169	down	NA
Zm00001d030034	-1.19058	down	#N/A
Zm00001d021993	-1.19048	down	Nucleotide-sugar transporter family protein
Zm00001d019504	-1.19024	down	AWPM-19-like family protein
Zm00001d045381	-1.18981	down	BRCT domain-containing DNA repair protein
Zm00001d014141	-1.18854	down	F-box family protein
Zm00001d004843	-1.18839	down	NA
Zm00001d043653	-1.18616	down	#N/A
Zm00001d040937	-1.18553	down	#N/A
Zm00001d028627	-1.18423	down	NA
Zm00001d011067	-1.18296	down	NA
Zm00001d010456	-1.18287	down	NA
Zm00001d016371	-1.18285	down	NA
Zm00001d027352	-1.18193	down	Pyridoxamine 5\'-phosphate oxidase family protein
Zm00001d032372	-1.18187	down	NA
Zm00001d005743	-1.18136	down	#N/A
Zm00001d003779	-1.17978	down	Glutaredoxin family protein
Zm00001d006603	-1.17976	down	#N/A
Zm00001d052620	-1.17863	down	NA
Zm00001d044628	-1.17839	down	alpha/beta-Hydrolases superfamily protein
Zm00001d003090	-1.17552	down	NADP-malic enzyme 1
Zm00001d044533	-1.17539	down	cation exchanger 1
Zm00001d029209	-1.17489	down	phosphatidylinositol- 4-phosphate 5-kinase 5
Zm00001d034208	-1.17487	down	exocyst complex component sec15A
Zm00001d010243	-1.17234	down	#N/A
Zm00001d038708	-1.17224	down	proline extensin-like receptor kinase 1
Zm00001d035556	-1.17078	down	NA
Zm00001d027958	-1.17019	down	NA
Zm00001d035211	-1.16971	down	Ca(2)-dependent phospholipid-binding protein (Copine) family
Zm00001d030019	-1.1693	down	Protein of unknown function (DUF498/DUF598)
Zm00001d028237	-1.16915	down	NA
Zm00001d003380	-1.1683	down	Gibberellin-regulated family protein
Zm00001d014194	-1.16672	down	#N/A
Zm00001d025786	-1.16619	down	DNA glycosylase superfamily protein
Zm00001d015328	-1.16291	down	Pectin lyase-like superfamily protein
Zm00001d010425	-1.16205	down	NA
Zm00001d023693	-1.16143	down	NA
Zm00001d048740	-1.16121	down	Leucine-rich repeat (LRR) family protein
Zm00001d020472	-1.16106	down	#N/A
Zm00001d028558	-1.15965	down	SH3 domain-containing protein
Zm00001d046434	-1.15773	down	acyl-CoA binding protein 4
Zm00001d043218	-1.15694	down	#N/A
Zm00001d029664	-1.15673	down	shaggy-like protein kinase 32
Zm00001d044838	-1.15548	down	HVA22 homologue A
Zm00001d050119	-1.15541	down	Aha1 domain-containing protein
Zm00001d027901	-1.15303	down	jasmonate-zim-domain protein 1
Zm00001d051430	-1.15287	down	DNA-directed RNA polymerase, subunit M, archaeal
Zm00001d052260	-1.15245	down	Nucleotide-diphospho-sugar transferases superfamily protein
Zm00001d051967	-1.15141	down	NA
Zm00001d047821	-1.15132	down	NA
Zm00001d043497	-1.15112	down	NA
Zm00001d047674	-1.1511	down	NA
Zm00001d005171	-1.15014	down	#N/A
Zm00001d006828	-1.14965	down	NA
Zm00001d049018	-1.1495	down	Trypsin family protein with PDZ domain
Zm00001d017461	-1.1464	down	Protein of unknown function (DUF630 and DUF632)
Zm00001d001906	-1.14564	down	NA
Zm00001d043831	-1.14557	down	Microtubule associated protein (MAP65/ASE1) family protein
Zm00001d047236	-1.14542	down	P-loop containing nucleoside triphosphate hydrolases superfamily protein
Zm00001d050916	-1.14527	down	Small nuclear ribonucleoprotein family protein
Zm00001d022264	-1.14504	down	Low temperature and salt responsive protein family
Zm00001d026984	-1.14288	down	#N/A
Zm00001d045237	-1.14207	down	#N/A
Zm00001d042799	-1.14204	down	G10 family protein
Zm00001d020471	-1.14193	down	#N/A
Zm00001d016836	-1.1417	down	NA
Zm00001d013243	-1.14154	down	Cyclic nucleotide-regulated ion channel family protein
Zm00001d000001	-1.14139	down	NA
Zm00001d031464	-1.14134	down	NA
Zm00001d028984	-1.13999	down	Homeodomain-like superfamily protein
Zm00001d032692	-1.13794	down	TRAF-like family protein
Zm00001d033254	-1.1363	down	patatin-like protein 6
Zm00001d027613	-1.13552	down	Tetratricopeptide repeat (TPR)-like superfamily protein
Zm00001d053641	-1.1347	down	NA
Zm00001d023507	-1.13066	down	VIRE2-interacting protein 1
Zm00001d032710	-1.12948	down	vacuolar protein sorting-associated protein 2.3
Zm00001d042888	-1.12919	down	ribosomal RNA processing 4
Zm00001d045477	-1.12543	down	basic pentacysteine 6
Zm00001d032155	-1.12466	down	SOS3-interacting protein 3
Zm00001d043484	-1.12423	down	#N/A
Zm00001d019901	-1.12326	down	Transducin/WD40 repeat-like superfamily protein
Zm00001d040027	-1.12316	down	#N/A
Zm00001d011164	-1.11999	down	NA
Zm00001d014757	-1.11764	down	Plant invertase/pectin methylesterase inhibitor superfamily protein
Zm00001d039474	-1.11743	down	#N/A
Zm00001d042726	-1.11637	down	BolA-like family protein
Zm00001d021448	-1.11585	down	O-fucosyltransferase family protein
Zm00001d041711	-1.11536	down	endoplasmic reticulum auxin binding protein 1
Zm00001d049557	-1.11442	down	Small nuclear ribonucleoprotein family protein
Zm00001d029976	-1.11416	down	calcineurin B-like protein 9
Zm00001d022099	-1.11363	down	nuclear factor Y, subunit B3
Zm00001d028522	-1.11331	down	Late embryogenesis abundant (LEA) hydroxyproline-rich glycoprotein family
Zm00001d032550	-1.1126	down	RING/U-box superfamily protein
Zm00001d043136	-1.11253	down	serine protease inhibitor, Kazal-type family protein
Zm00001d018825	-1.11242	down	Protein kinase superfamily protein
Zm00001d012153	-1.11113	down	UDP-galactose transporter 6
Zm00001d050099	-1.11074	down	NA
Zm00001d013119	-1.11018	down	TEOSINTE BRANCHED 1, cycloidea and PCF transcription factor 2
Zm00001d041323	-1.10956	down	Di-glucose binding protein with Kinesin motor domain
Zm00001d014458	-1.10952	down	#N/A
Zm00001d053102	-1.10939	down	NA
Zm00001d001471	-1.10887	down	#N/A
Zm00001d031098	-1.10834	down	IQ-domain 5
Zm00001d017772	-1.10635	down	Membrane fusion protein Use1
Zm00001d005252	-1.10536	down	Leucine-rich repeat protein kinase family protein
Zm00001d005884	-1.10359	down	abscisic acid responsive element-binding factor 1
Zm00001d021056	-1.10342	down	NA
Zm00001d040005	-1.10341	down	Protein of unknown function (DUF1666)
Zm00001d038301	-1.10305	down	NA
Zm00001d011188	-1.10289	down	3\'-5\' exonuclease domain-containing protein / K homology domain-containing protein / KH domain-containing protein
Zm00001d035651	-1.10262	down	OBF-binding protein 3
Zm00001d006090	-1.102	down	NA
Zm00001d016952	-1.10184	down	myb domain protein 106
Zm00001d048198	-1.10066	down	Yippee family putative zinc-binding protein
Zm00001d016408	-1.09966	down	NA
Zm00001d045160	-1.09955	down	sulfiredoxin
Zm00001d030697	-1.0987	down	NA
Zm00001d017100	-1.09854	down	vacuolar protein sorting-associated protein 20.2
Zm00001d020429	-1.09779	down	Protein kinase superfamily protein
Zm00001d009552	-1.09775	down	ubiquitin-conjugating enzyme 36
Zm00001d028361	-1.09738	down	C2H2-like zinc finger protein
Zm00001d022461	-1.09603	down	ethylene-responsive element binding protein
Zm00001d003062	-1.09601	down	NA
Zm00001d008398	-1.09558	down	NA
Zm00001d037612	-1.09536	down	NA
Zm00001d021136	-1.09455	down	Protein kinase superfamily protein
Zm00001d002848	-1.09408	down	NAD(P)-binding Rossmann-fold superfamily protein
Zm00001d012301	-1.09402	down	G10 family protein
Zm00001d001080	-1.09375	down	#N/A
Zm00001d003068	-1.09091	down	phosphoenolpyruvate carboxylase kinase 1
Zm00001d000561	-1.09086	down	#N/A
Zm00001d052478	-1.08948	down	#N/A
Zm00001d027011	-1.08923	down	#N/A
Zm00001d014460	-1.08901	down	CRINKLY4 related 3
Zm00001d002736	-1.08884	down	carotenoid cleavage dioxygenase 7
Zm00001d010754	-1.08822	down	NA
Zm00001d035610	-1.08807	down	Preprotein translocase Sec, Sec61-beta subunit protein
Zm00001d032239	-1.08682	down	NA
Zm00001d016827	-1.08576	down	DDT domain-containing protein
Zm00001d021839	-1.08515	down	Remorin family protein
Zm00001d030300	-1.0848	down	#N/A
Zm00001d042313	-1.08389	down	Calmodulin-binding transcription activator protein with CG-1 and Ankyrin domains
Zm00001d014161	-1.08358	down	Protein kinase superfamily protein
Zm00001d044836	-1.08259	down	TEOSINTE BRANCHED, cycloidea and PCF (TCP) 14
Zm00001d009811	-1.08187	down	Kinase interacting (KIP1-like) family protein
Zm00001d026518	-1.08124	down	BSD domain-containing protein
Zm00001d013225	-1.08113	down	#N/A
Zm00001d008396	-1.08032	down	NA
Zm00001d013996	-1.07998	down	syntaxin of plants 43
Zm00001d046029	-1.07838	down	Aluminium activated malate transporter family protein
Zm00001d006458	-1.07829	down	#N/A
Zm00001d039437	-1.07828	down	light-regulated zinc finger protein 1
Zm00001d005199	-1.07816	down	Protein kinase superfamily protein
Zm00001d030920	-1.07809	down	NA
Zm00001d006046	-1.07692	down	methyl-CPG-binding domain protein 02
Zm00001d017853	-1.07686	down	zinc finger (CCCH-type/C3HC4-type RING finger) family protein
Zm00001d012832	-1.07626	down	NA
Zm00001d019631	-1.0752	down	K+ uptake permease 11
Zm00001d015427	-1.07497	down	#N/A
Zm00001d005751	-1.07309	down	golgi snare 11
Zm00001d020823	-1.07269	down	basic leucine-zipper 42
Zm00001d007897	-1.07221	down	ubiquiting-conjugating enzyme 2
Zm00001d042598	-1.0714	down	NA
Zm00001d039575	-1.07037	down	2-oxoglutarate (2OG) and Fe(II)-dependent oxygenase superfamily protein
Zm00001d035079	-1.06975	down	NA
Zm00001d002267	-1.0692	down	global transcription factor group E7
Zm00001d011136	-1.06811	down	NA
Zm00001d036829	-1.06653	down	alpha/beta-Hydrolases superfamily protein
Zm00001d015116	-1.06638	down	NA
Zm00001d007645	-1.0659	down	NA
Zm00001d040629	-1.06584	down	Phospholipid/glycerol acyltransferase family protein
Zm00001d035162	-1.06584	down	lysine histidine transporter 1
Zm00001d017949	-1.06525	down	glycosyl hydrolase 9B1
Zm00001d014580	-1.06454	down	NA
Zm00001d021733	-1.06353	down	Pentatricopeptide repeat (PPR) superfamily protein
Zm00001d015407	-1.06292	down	Homeodomain-like superfamily protein
Zm00001d044382	-1.06198	down	alpha/beta-Hydrolases superfamily protein
Zm00001d043307	-1.06176	down	Polyketide cyclase / dehydrase and lipid transport protein
Zm00001d009899	-1.06059	down	#N/A
Zm00001d028773	-1.06001	down	Cox19-like CHCH family protein
Zm00001d032123	-1.05929	down	Splicing factor 3B subunit 5/RDS3 complex subunit 10
Zm00001d010727	-1.05781	down	#N/A
Zm00001d038066	-1.05722	down	annexin 3
Zm00001d049006	-1.05703	down	#N/A
Zm00001d008916	-1.05682	down	Small nuclear ribonucleoprotein family protein
Zm00001d033654	-1.05636	down	NA
Zm00001d005866	-1.05627	down	PDI-like 2-3
Zm00001d032909	-1.0544	down	cellulose synthase-like D5
Zm00001d039711	-1.05389	down	Kinase interacting (KIP1-like) family protein
Zm00001d046500	-1.05276	down	SPX domain gene 1
Zm00001d030833	-1.05273	down	NA
Zm00001d052167	-1.05263	down	ethylene-responsive element binding protein
Zm00001d017885	-1.05236	down	B-box type zinc finger protein with CCT domain
Zm00001d049902	-1.05206	down	NA
Zm00001d039637	-1.05181	down	Homeodomain-like superfamily protein
Zm00001d051499	-1.05157	down	F-box family protein
Zm00001d037413	-1.05114	down	microtubule-associated protein 65-2
Zm00001d048983	-1.05049	down	NA
Zm00001d020622	-1.05016	down	NA
Zm00001d031531	-1.04998	down	#N/A
Zm00001d005628	-1.0498	down	NA
Zm00001d050245	-1.04972	down	RNA-binding (RRM/RBD/RNP motifs) family protein
Zm00001d009487	-1.04877	down	NA
Zm00001d018072	-1.04865	down	NA
Zm00001d038348	-1.04844	down	guanylyl cyclase 1
Zm00001d028375	-1.04831	down	B-cell receptor-associated 31-like
Zm00001d010093	-1.0481	down	light-regulated zinc finger protein 1
Zm00001d005885	-1.04775	down	NA
Zm00001d050697	-1.04759	down	Histone superfamily protein
Zm00001d008200	-1.04688	down	Low temperature and salt responsive protein family
Zm00001d013512	-1.04572	down	Protein of unknown function (DUF1336)
Zm00001d030834	-1.04479	down	NA
Zm00001d052640	-1.04383	down	SBP (S-ribonuclease binding protein) family protein
Zm00001d017530	-1.04334	down	Late embryogenesis abundant (LEA) hydroxyproline-rich glycoprotein family
Zm00001d004153	-1.04188	down	cleavage and polyadenylation specificity factor 160
Zm00001d003457	-1.04183	down	Lipase/lipooxygenase, PLAT/LH2 family protein
Zm00001d016465	-1.04151	down	Polynucleotidyl transferase, ribonuclease H-like superfamily protein
Zm00001d005733	-1.04126	down	Copper transport protein family
Zm00001d008529	-1.03984	down	endonuclease 4
Zm00001d035304	-1.03917	down	GATA type zinc finger transcription factor family protein
Zm00001d027877	-1.03763	down	NA
Zm00001d038504	-1.03662	down	AP2/B3-like transcriptional factor family protein
Zm00001d015818	-1.03645	down	#N/A
Zm00001d011353	-1.03631	down	SNF7 family protein
Zm00001d038688	-1.03629	down	RHO-related protein from plants 9
Zm00001d014858	-1.03599	down	high mobility group B3
Zm00001d010739	-1.0349	down	#N/A
Zm00001d000349	-1.03486	down	#N/A
Zm00001d010823	-1.0329	down	CASC3/Barentsz eIF4AIII binding
Zm00001d042845	-1.03102	down	Josephin family protein
Zm00001d027749	-1.03038	down	sulfate transporter 3;1
Zm00001d012880	-1.03017	down	PRLI-interacting factor, putative
Zm00001d026652	-1.02992	down	AT hook motif DNA-binding family protein
Zm00001d021378	-1.02987	down	ARM repeat superfamily protein
Zm00001d027455	-1.02973	down	CBL-interacting protein kinase 9
Zm00001d043406	-1.02935	down	interactor of constitutive active rops 1
Zm00001d001894	-1.02884	down	Homeodomain-like superfamily protein
Zm00001d038536	-1.0276	down	Endoplasmic reticulum vesicle transporter protein
Zm00001d036547	-1.02488	down	Translation machinery associated TMA7
Zm00001d025425	-1.02381	down	NA
Zm00001d008970	-1.02181	down	plastid division1
Zm00001d036360	-1.02159	down	Cyclin B2;3
Zm00001d040901	-1.02111	down	NA
Zm00001d001967	-1.02072	down	Mediator complex, subunit Med7
Zm00001d033211	-1.02069	down	IQ-domain 5
Zm00001d028999	-1.02014	down	NAC domain containing protein 47
Zm00001d019808	-1.0189	down	Nucleotidyltransferase family protein
Zm00001d007768	-1.01878	down	BIG PETAL P
Zm00001d048070	-1.01862	down	Leucine-rich repeat protein kinase family protein
Zm00001d042851	-1.01725	down	Arabidopsis Inositol phosphorylceramide synthase 1
Zm00001d053650	-1.01593	down	F-box and associated interaction domains-containing protein
Zm00001d023968	-1.0158	down	glutathione S-transferase (class zeta) 2
Zm00001d014947	-1.01566	down	Glycosyl hydrolases family 32 protein
Zm00001d033905	-1.01531	down	SSXT family protein
Zm00001d034522	-1.01522	down	Ypt/Rab-GAP domain of gyp1p superfamily protein
Zm00001d036965	-1.01499	down	zinc transporter 4 precursor
Zm00001d011997	-1.01437	down	DNAJ heat shock N-terminal domain-containing protein
Zm00001d010496	-1.01435	down	NA
Zm00001d008985	-1.01352	down	cytochrome P450, family 71, subfamily A, polypeptide 25
Zm00001d052252	-1.01332	down	Glutaredoxin family protein
Zm00001d029847	-1.01318	down	U-box domain-containing protein kinase family protein
Zm00001d041381	-1.0128	down	Transducin/WD40 repeat-like superfamily protein
Zm00001d009011	-1.01181	down	#N/A
Zm00001d031593	-1.01178	down	SMAD/FHA domain-containing protein
Zm00001d020411	-1.01149	down	plant UBX domain-containing protein 2
Zm00001d032528	-1.00999	down	#N/A
Zm00001d032058	-1.00963	down	NA
Zm00001d041814	-1.00908	down	#N/A
Zm00001d023462	-1.00848	down	DNA primase, large subunit family
Zm00001d011562	-1.00823	down	Protein of unknown function (DUF1421)
Zm00001d012128	-1.00818	down	response regulator 11
Zm00001d043164	-1.00798	down	Cyclin family protein
Zm00001d039965	-1.00794	down	sterol 1
Zm00001d018546	-1.00738	down	#N/A
Zm00001d010440	-1.00716	down	Nodulin MtN3 family protein
Zm00001d010819	-1.00708	down	NA
Zm00001d033171	-1.00651	down	Thioredoxin superfamily protein
Zm00001d053805	-1.00631	down	FKBP-like peptidyl-prolyl cis-trans isomerase family protein
Zm00001d010610	-1.00512	down	Plant protein of unknown function (DUF827)
Zm00001d049184	-1.00492	down	oxidoreductase, 2OG-Fe(II) oxygenase family protein
Zm00001d003620	-1.00472	down	#N/A
Zm00001d048366	-1.00412	down	NA
Zm00001d025669	-1.00382	down	WRKY DNA-binding protein 2
Zm00001d038002	-1.00314	down	dehydration-induced protein (ERD15)
Zm00001d054016	-1.00274	down	glutamate receptor 3.3
Zm00001d050019	-1.00241	down	NA
Zm00001d008752	-1.00224	down	Calcium-dependent lipid-binding (CaLB domain) family protein
Zm00001d040223	-1.00192	down	NA
Zm00001d052177	-1.00188	down	NA
Zm00001d026042	-1.00138	down	purine permease 11
Zm00001d007401	-1.00114	down	NA
Zm00001d032060	-1.0007	down	RELA/SPOT homolog 3
Zm00001d020054	-1.00052	down	NA
Zm00001d042868	-1.00038	down	NAD(P)-linked oxidoreductase superfamily protein
Zm00001d040381	-1.00002	down	#N/A
Zm00001d040020	1.00032	up	Mannose-6-phosphate isomerase, type I
Zm00001d042282	1.00045	up	#N/A
Zm00001d002003	1.00076	up	purine biosynthesis 4
Zm00001d040803	1.00083	up	ralf-like 33
Zm00001d038547	1.00158	up	glutamate-1-semialdehyde 2,1-aminomutase 2
Zm00001d032197	1.00197	up	light-harvesting chlorophyll-protein complex I subunit A4
Zm00001d031782	1.005	up	Pentatricopeptide repeat (PPR) superfamily protein
Zm00001d005950	1.00537	up	dicarboxylate transport 2.1
Zm00001d053298	1.00565	up	NA
Zm00001d011263	1.00618	up	Ribosomal protein L25/Gln-tRNA synthetase, anti-codon-binding domain
Zm00001d013251	1.00676	up	receptor-like protein kinase 2
Zm00001d024423	1.00803	up	polymerase gamma 2
Zm00001d010835	1.00839	up	Arginyl-tRNA synthetase, class Ic
Zm00001d043601	1.00873	up	NADP-malic enzyme 3
Zm00001d012736	1.00934	up	#N/A
Zm00001d044281	1.01119	up	Helicase/SANT-associated, DNA binding protein
Zm00001d017185	1.01122	up	pentatricopeptide (PPR) repeat-containing protein
Zm00001d006822	1.01198	up	Pentatricopeptide repeat (PPR) superfamily protein
Zm00001d036971	1.01234	up	ATP/GTP-binding protein family
Zm00001d051829	1.01402	up	senescence-associated E3 ubiquitin ligase 1
Zm00001d026068	1.01463	up	subtilase 1.3
Zm00001d052482	1.01481	up	ribose-5-phosphate isomerase 2
Zm00001d028793	1.01511	up	Polyketide cyclase/dehydrase and lipid transport superfamily protein
Zm00001d045403	1.01553	up	N-terminal nucleophile aminohydrolases (Ntn hydrolases) superfamily protein
Zm00001d046790	1.01559	up	Pentatricopeptide repeat (PPR) superfamily protein
Zm00001d019297	1.0156	up	Tetratricopeptide repeat (TPR)-like superfamily protein
Zm00001d048411	1.016	up	Heavy metal transport/detoxification superfamily protein
Zm00001d022125	1.01614	up	ARM repeat superfamily protein
Zm00001d034143	1.01659	up	Acyl-CoA N-acyltransferases (NAT) superfamily protein
Zm00001d019299	1.01671	up	Transducin/WD40 repeat-like superfamily protein
Zm00001d043312	1.0169	up	ubiquitin-specific protease 13
Zm00001d012254	1.01712	up	SEC14 cytosolic factor family protein / phosphoglyceride transfer family protein
Zm00001d052566	1.01765	up	RING/U-box superfamily protein
Zm00001d006031	1.01767	up	NA
Zm00001d020909	1.01795	up	2-oxoglutarate (2OG) and Fe(II)-dependent oxygenase superfamily protein
Zm00001d032073	1.01821	up	NA
Zm00001d049872	1.01963	up	ARF GTPase-activating protein
Zm00001d051225	1.01978	up	GRAM domain-containing protein / ABA-responsive protein-related
Zm00001d008218	1.01985	up	Coatomer, beta subunit
Zm00001d012908	1.02045	up	alpha/beta-Hydrolases superfamily protein
Zm00001d048737	1.02054	up	NA
Zm00001d004070	1.02056	up	Nuclear transport factor 2 (NTF2) family protein with RNA binding (RRM-RBD-RNP motifs) domain
Zm00001d037098	1.02107	up	NA
Zm00001d019108	1.02182	up	RNA binding;RNA binding
Zm00001d054077	1.02216	up	RNA-binding (RRM/RBD/RNP motifs) family protein
Zm00001d013799	1.02238	up	ARABIDOPSIS SERIN PROTEASE
Zm00001d034890	1.02342	up	#N/A
Zm00001d007838	1.0237	up	Pentatricopeptide repeat (PPR) superfamily protein
Zm00001d034167	1.02382	up	Peptidase S24/S26A/S26B/S26C family protein
Zm00001d007869	1.0243	up	UDP-glucosyl transferase 71C4
Zm00001d048065	1.02531	up	tubulin alpha-5
Zm00001d011610	1.02582	up	NADH-dependent glutamate synthase 1
Zm00001d030762	1.02608	up	Protein of unknown function (DUF1118)
Zm00001d004977	1.02711	up	cytochrome c biogenesis protein family
Zm00001d025156	1.0279	up	#N/A
Zm00001d012610	1.02943	up	Adenine nucleotide alpha hydrolases-like superfamily protein
Zm00001d044416	1.02972	up	cytochrome BC1 synthesis
Zm00001d008641	1.03032	up	#N/A
Zm00001d032409	1.03121	up	sugar transporter 1
Zm00001d020771	1.03167	up	phosphoglucose isomerase 1
Zm00001d011779	1.03183	up	transducin family protein / WD-40 repeat family protein
Zm00001d020030	1.03241	up	chlororespiratory reduction 3
Zm00001d050234	1.03282	up	NA
Zm00001d034761	1.03302	up	actin 7
Zm00001d021515	1.03353	up	NDH-dependent cyclic electron flow 1
Zm00001d043864	1.03446	up	#N/A
Zm00001d003031	1.03486	up	P-loop containing nucleoside triphosphate hydrolases superfamily protein
Zm00001d034550	1.03498	up	Ribosomal protein S5 family protein
Zm00001d044139	1.0366	up	NA
Zm00001d014759	1.0375	up	KRR1 family protein
Zm00001d051543	1.0378	up	Ribosomal protein L11 family protein
Zm00001d019100	1.03783	up	Bifunctional inhibitor/lipid-transfer protein/seed storage 2S albumin superfamily protein
Zm00001d040795	1.03804	up	Chaperone DnaJ-domain superfamily protein
Zm00001d006533	1.03834	up	villin 4
Zm00001d004154	1.03845	up	cleavage and polyadenylation specificity factor 160
Zm00001d040936	1.03962	up	Cyclin family protein
Zm00001d007130	1.03995	up	NA
Zm00001d034513	1.04026	up	Bifunctional inhibitor/lipid-transfer protein/seed storage 2S albumin superfamily protein
Zm00001d028806	1.04049	up	NAD(P)-binding Rossmann-fold superfamily protein
Zm00001d053217	1.04076	up	proteasome alpha subunit D2
Zm00001d032572	1.04202	up	GCR2-like 2
Zm00001d016166	1.04205	up	phosphoenolpyruvate carboxylase 3
Zm00001d019898	1.0421	up	RNA-binding (RRM/RBD/RNP motifs) family protein
Zm00001d043662	1.04231	up	alpha-amylase-like 3
Zm00001d017607	1.0424	up	Tetratricopeptide repeat (TPR)-like superfamily protein
Zm00001d002145	1.04245	up	NA
Zm00001d020982	1.0435	up	NAC domain containing protein 38
Zm00001d037816	1.04479	up	SLAC1 homologue 3
Zm00001d046097	1.04539	up	P-loop containing nucleoside triphosphate hydrolases superfamily protein
Zm00001d041300	1.04565	up	#N/A
Zm00001d034629	1.04592	up	related to AP2.7
Zm00001d052389	1.04612	up	HOPZ-ACTIVATED RESISTANCE 1
Zm00001d016276	1.04639	up	Ribosomal protein S24e family protein
Zm00001d029046	1.04684	up	P-loop containing nucleoside triphosphate hydrolases superfamily protein
Zm00001d002591	1.04882	up	Nuclear transport factor 2 (NTF2) family protein
Zm00001d037975	1.04887	up	Pentatricopeptide repeat (PPR) superfamily protein
Zm00001d002454	1.04929	up	phosphoribulokinase
Zm00001d008930	1.04965	up	tetratricopetide-repeat thioredoxin-like 3
Zm00001d011174	1.05019	up	gamma vacuolar processing enzyme
Zm00001d010907	1.05049	up	myb domain protein 61
Zm00001d006769	1.05052	up	#N/A
Zm00001d012036	1.05134	up	sucrose phosphate synthase 3F
Zm00001d033180	1.05178	up	brassinosteroid-6-oxidase 2
Zm00001d042023	1.05189	up	RNA binding Plectin/S10 domain-containing protein
Zm00001d007573	1.05246	up	#N/A
Zm00001d024409	1.05272	up	Tetratricopeptide repeat (TPR)-like superfamily protein
Zm00001d045139	1.05297	up	Inorganic H pyrophosphatase family protein
Zm00001d002695	1.05414	up	Phosphatidylinositol N-acetyglucosaminlytransferase subunit P-related
Zm00001d052357	1.05458	up	WRKY DNA-binding protein 55
Zm00001d039096	1.05651	up	Tetratricopeptide repeat (TPR)-like superfamily protein
Zm00001d023843	1.05683	up	Calmodulin-binding protein
Zm00001d040441	1.05839	up	NA
Zm00001d005137	1.05857	up	EDM2-like protein1
Zm00001d015182	1.05858	up	#N/A
Zm00001d003427	1.05861	up	ATP-dependent RNA helicase, mitochondrial, putative
Zm00001d012274	1.05871	up	HXXXD-type acyl-transferase family protein
Zm00001d043702	1.0593	up	#N/A
Zm00001d002871	1.06018	up	white-brown complex homolog protein 11
Zm00001d012529	1.06118	up	zinc finger (Ran-binding) family protein
Zm00001d006629	1.06163	up	Mitochondrial transcription termination factor family protein
Zm00001d051887	1.06231	up	calmodulin-binding receptor-like cytoplasmic kinase 2
Zm00001d007179	1.06279	up	eukaryotic translation initiation factor 2 beta subunit
Zm00001d038764	1.06437	up	#N/A
Zm00001d046118	1.06478	up	NA
Zm00001d034543	1.0652	up	photosystem I subunit D-1
Zm00001d005964	1.0666	up	basic helix-loop-helix (bHLH) DNA-binding superfamily protein
Zm00001d026280	1.06702	up	nucleotide binding;nucleic acid binding;RNA binding
Zm00001d018128	1.06779	up	#N/A
Zm00001d043523	1.07049	up	profilin 5
Zm00001d021896	1.0705	up	receptor lectin kinase
Zm00001d043155	1.0708	up	las1-like family protein
Zm00001d051267	1.07229	up	myb domain protein 19
Zm00001d018963	1.07295	up	Pentatricopeptide repeat (PPR) superfamily protein
Zm00001d022102	1.0743	up	NA
Zm00001d002065	1.07532	up	Granulin repeat cysteine protease family protein
Zm00001d037828	1.07606	up	GDSL-like Lipase/Acylhydrolase superfamily protein
Zm00001d034770	1.07733	up	cellulose synthase 6
Zm00001d036046	1.07739	up	magnesium-protoporphyrin IX methyltransferase
Zm00001d032789	1.07788	up	heat shock protein 60
Zm00001d011877	1.07801	up	NA
Zm00001d018496	1.07802	up	#N/A
Zm00001d038576	1.07834	up	autoinhibited Ca(2+)-ATPase, isoform 4
Zm00001d006243	1.07906	up	beta-galactosidase 14
Zm00001d037868	1.07932	up	eukaryotic release factor 1-3
Zm00001d021019	1.07948	up	basic helix-loop-helix (bHLH) DNA-binding superfamily protein
Zm00001d009247	1.07985	up	ralf-like 33
Zm00001d018242	1.08074	up	Cation efflux family protein
Zm00001d040244	1.08117	up	pathogenesis-related family protein
Zm00001d034444	1.08196	up	Protein of unknown function (DUF506)
Zm00001d025222	1.08405	up	splicing factor-related
Zm00001d042673	1.08408	up	GLN phosphoribosyl pyrophosphate amidotransferase 1
Zm00001d038964	1.08441	up	NA
Zm00001d003913	1.08448	up	Bacterial sec-independent translocation protein mttA/Hcf106
Zm00001d002897	1.08478	up	Peroxidase superfamily protein
Zm00001d026397	1.08496	up	UBP1-associated protein 2A
Zm00001d018344	1.08529	up	receptor like protein 44
Zm00001d048342	1.08565	up	#N/A
Zm00001d008230	1.08713	up	dicarboxylate diiron protein, putative (Crd1)
Zm00001d002175	1.08714	up	Malectin/receptor-like protein kinase family protein
Zm00001d040542	1.08778	up	Pentatricopeptide repeat (PPR) superfamily protein
Zm00001d015449	1.09126	up	Ribosomal RNA adenine dimethylase family protein
Zm00001d007180	1.09192	up	cytochrome P450, family 714, subfamily A, polypeptide 1
Zm00001d013319	1.09201	up	glycosyl hydrolase 9A1
Zm00001d001818	1.0924	up	#N/A
Zm00001d013136	1.09276	up	Tetratricopeptide repeat (TPR)-like superfamily protein
Zm00001d038555	1.09317	up	cytochrome P450, family 98, subfamily A, polypeptide 3
Zm00001d028183	1.09374	up	TCP-1/cpn60 chaperonin family protein
Zm00001d027384	1.09446	up	ARM repeat superfamily protein
Zm00001d016694	1.09598	up	NAD+ ADP-ribosyltransferases;NAD+ ADP-ribosyltransferases
Zm00001d005851	1.09614	up	Prolyl oligopeptidase family protein
Zm00001d053900	1.09622	up	#N/A
Zm00001d029104	1.09625	up	U3 ribonucleoprotein (Utp) family protein
Zm00001d028022	1.0983	up	nucleotidyltransferases
Zm00001d035092	1.0984	up	NA
Zm00001d022229	1.09842	up	malate dehydrogenase
Zm00001d026691	1.10124	up	DDB1-CUL4 associated factor 1
Zm00001d039758	1.10147	up	ARM repeat superfamily protein
Zm00001d012859	1.10373	up	NA
Zm00001d027607	1.10401	up	plasmodesmata-located protein 3
Zm00001d051389	1.10413	up	Calcium-dependent lipid-binding (CaLB domain) plant phosphoribosyltransferase family protein
Zm00001d049357	1.10461	up	26S proteasome regulatory complex, non-ATPase subcomplex, Rpn2/Psmd1 subunit
Zm00001d020176	1.10545	up	NAD(P)-binding Rossmann-fold superfamily protein
Zm00001d012144	1.10729	up	AMP-dependent synthetase and ligase family protein
Zm00001d043549	1.10935	up	Late embryogenesis abundant (LEA) hydroxyproline-rich glycoprotein family
Zm00001d043019	1.10961	up	laccase 12
Zm00001d031688	1.11021	up	general regulatory factor 7
Zm00001d033750	1.11121	up	L-O-methylthreonine resistant 1
Zm00001d002943	1.11128	up	proteinaceous RNase P 1
Zm00001d021672	1.11226	up	PPDK regulatory protein
Zm00001d045993	1.11279	up	poor homologous synapsis 1
Zm00001d038355	1.11285	up	POX (plant homeobox) family protein
Zm00001d036328	1.11288	up	2-oxoglutarate dehydrogenase, E1 component
Zm00001d052793	1.11322	up	Glycosyl hydrolase family protein
Zm00001d030572	1.11362	up	#N/A
Zm00001d011099	1.11452	up	methionine S-methyltransferase
Zm00001d043955	1.11455	up	Eukaryotic translation initiation factor 3 subunit 7 (eIF-3)
Zm00001d016453	1.11524	up	Pentatricopeptide repeat (PPR-like) superfamily protein
Zm00001d027536	1.11573	up	serine acetyltransferase 3;2
Zm00001d033194	1.11597	up	Subtilase family protein
Zm00001d004330	1.11631	up	NA
Zm00001d031997	1.1175	up	NAD(P)-binding Rossmann-fold superfamily protein
Zm00001d028941	1.11865	up	NA
Zm00001d031958	1.11907	up	uridine-ribohydrolase 1
Zm00001d045927	1.11922	up	diacylglycerol acyltransferase family
Zm00001d012103	1.11966	up	Aldolase superfamily protein
Zm00001d045706	1.12132	up	aldehyde dehydrogenase 2B7
Zm00001d017090	1.12243	up	NA
Zm00001d030009	1.12272	up	Haloacid dehalogenase-like hydrolase (HAD) superfamily protein
Zm00001d008424	1.1228	up	#N/A
Zm00001d044475	1.123	up	HXXXD-type acyl-transferase family protein
Zm00001d021714	1.12308	up	Phototropic-responsive NPH3 family protein
Zm00001d021072	1.1236	up	NA
Zm00001d010619	1.12522	up	NA
Zm00001d048368	1.12718	up	Ribosomal protein L14p/L23e family protein
Zm00001d005315	1.12912	up	#N/A
Zm00001d037198	1.12952	up	#N/A
Zm00001d053269	1.12956	up	Histidine kinase-, DNA gyrase B-, and HSP90-like ATPase family protein
Zm00001d008491	1.12997	up	Aldolase superfamily protein
Zm00001d017979	1.13118	up	dynamin-like 3
Zm00001d053181	1.13166	up	Protein of unknown function (DUF793)
Zm00001d014243	1.13491	up	Protein kinase superfamily protein
Zm00001d022836	1.13611	up	#N/A
Zm00001d030253	1.13656	up	HXXXD-type acyl-transferase family protein
Zm00001d017111	1.13689	up	#N/A
Zm00001d006845	1.1371	up	ARM repeat superfamily protein
Zm00001d052520	1.13728	up	Plant protein of unknown function (DUF868)
Zm00001d023655	1.13753	up	15-cis-zeta-carotene isomerase
Zm00001d015375	1.13775	up	Ribosomal protein L18e/L15 superfamily protein
Zm00001d034874	1.13779	up	NA
Zm00001d028782	1.13962	up	Eukaryotic translation initiation factor 2 subunit 1
Zm00001d021310	1.1405	up	NA
Zm00001d047472	1.14269	up	homolog of nucleolar protein NOP56
Zm00001d009740	1.14358	up	Hyaluronan / mRNA binding family
Zm00001d007145	1.14367	up	Ribosomal protein S8e family protein
Zm00001d039299	1.14408	up	ribosomal protein S15A
Zm00001d031212	1.1442	up	Thiolase family protein
Zm00001d048407	1.14424	up	#N/A
Zm00001d034072	1.14447	up	UDP-glucose 6-dehydrogenase family protein
Zm00001d002446	1.14636	up	wall-associated kinase 2
Zm00001d043547	1.14683	up	UDP-glucosyl transferase 88A1
Zm00001d010452	1.14697	up	NA
Zm00001d023422	1.14717	up	Pentatricopeptide repeat (PPR) superfamily protein
Zm00001d009411	1.14731	up	Glycinamide ribonucleotide (GAR) synthetase
Zm00001d050920	1.14802	up	Ribosomal protein L6 family protein
Zm00001d013179	1.14921	up	cold-regulated 413-plasma membrane 2
Zm00001d053393	1.15113	up	Core-2/I-branching beta-1,6-N-acetylglucosaminyltransferase family protein
Zm00001d020004	1.15334	up	Glucose-6-phosphate/phosphate translocator-related
Zm00001d038206	1.15372	up	Pentatricopeptide repeat (PPR) superfamily protein
Zm00001d007092	1.15392	up	#N/A
Zm00001d005473	1.15401	up	decapping 1
Zm00001d000021	1.1543	up	glucose-6-phosphate/phosphate translocator 2
Zm00001d026472	1.15473	up	D-3-phosphoglycerate dehydrogenase
Zm00001d015651	1.15484	up	lycopene cyclase
Zm00001d015090	1.15494	up	AT-hook motif nuclear-localized protein 1
Zm00001d041135	1.15504	up	Lojap-related protein
Zm00001d027845	1.15595	up	NA
Zm00001d042812	1.15821	up	Tetratricopeptide repeat (TPR)-like superfamily protein
Zm00001d018281	1.15897	up	Subtilase family protein
Zm00001d019473	1.15897	up	Ribosomal protein L2 family
Zm00001d032576	1.15968	up	protochlorophyllide oxidoreductase A
Zm00001d024277	1.16002	up	NA
Zm00001d043907	1.16004	up	Nucleotidyltransferase family protein
Zm00001d008293	1.1601	up	SWAP (Suppressor-of-White-APricot)/surp domain-containing protein / ubiquitin family protein
Zm00001d016801	1.16031	up	8-oxoguanine-DNA glycosylase 1
Zm00001d044490	1.16192	up	Tetratricopeptide repeat (TPR)-like superfamily protein
Zm00001d021715	1.16213	up	high chlorophyll fluorescent 109
Zm00001d025225	1.1631	up	NA
Zm00001d042060	1.16317	up	Predicted AT-hook DNA-binding family protein
Zm00001d050493	1.16367	up	alpha/beta-Hydrolases superfamily protein
Zm00001d040446	1.164	up	Pyruvate kinase family protein
Zm00001d034883	1.16411	up	nucleotide binding;protein binding
Zm00001d016684	1.16565	up	starch branching enzyme 2.2
Zm00001d028341	1.16589	up	NA
Zm00001d031230	1.16646	up	#N/A
Zm00001d049203	1.16718	up	Tetratricopeptide repeat (TPR)-like superfamily protein
Zm00001d014471	1.16745	up	#N/A
Zm00001d007012	1.16813	up	chloroplast RNA-binding protein 29
Zm00001d008869	1.16831	up	#N/A
Zm00001d042526	1.16923	up	Rhodanese/Cell cycle control phosphatase superfamily protein
Zm00001d033555	1.16979	up	Fumarylacetoacetate (FAA) hydrolase family
Zm00001d008176	1.17032	up	squamosa promoter-binding protein-like 12
Zm00001d006041	1.17138	up	NA
Zm00001d014524	1.172	up	NA
Zm00001d026532	1.17212	up	Regulator of chromosome condensation (RCC1) family protein
Zm00001d013191	1.17225	up	#N/A
Zm00001d015383	1.17236	up	glyceraldehyde-3-phosphate dehydrogenase of plastid 1
Zm00001d010743	1.17357	up	CBL-interacting protein kinase 12
Zm00001d047977	1.17501	up	Endomembrane protein 70 protein family
Zm00001d040475	1.17714	up	PENTATRICOPEPTIDE REPEAT 596
Zm00001d024352	1.17857	up	PR5-like receptor kinase
Zm00001d035115	1.17858	up	MATE efflux family protein
Zm00001d036615	1.17872	up	NA
Zm00001d006838	1.179	up	NA
Zm00001d013081	1.17939	up	Pentatricopeptide repeat (PPR) superfamily protein
Zm00001d052289	1.17982	up	pyruvate dehydrogenase complex E1 alpha subunit
Zm00001d045928	1.18002	up	Predicted AT-hook DNA-binding family protein
Zm00001d032981	1.18078	up	calmodulin-binding family protein
Zm00001d002545	1.18183	up	NA
Zm00001d026431	1.182	up	flavanone 3-hydroxylase
Zm00001d038452	1.18379	up	ENTH/VHS/GAT family protein
Zm00001d009522	1.18591	up	3\'-5\'-exoribonuclease family protein
Zm00001d002734	1.18617	up	N-acetyl-l-glutamate kinase
Zm00001d033155	1.18635	up	CBS domain-containing protein / transporter associated domain-containing protein
Zm00001d029720	1.18665	up	Protein of unknown function (DUF3464)
Zm00001d015992	1.18705	up	Enoyl-CoA hydratase/isomerase family
Zm00001d032478	1.18779	up	Ubiquitin carboxyl-terminal hydrolase family protein
Zm00001d048229	1.18829	up	#N/A
Zm00001d022659	1.19113	up	#N/A
Zm00001d041480	1.19371	up	putative mitochondrial RNA helicase 2
Zm00001d046596	1.19479	up	Bifunctional inhibitor/lipid-transfer protein/seed storage 2S albumin superfamily protein
Zm00001d002864	1.1951	up	Major facilitator superfamily protein
Zm00001d028812	1.19569	up	zinc finger (MYND type) family protein / programmed cell death 2 C-terminal domain-containing protein
Zm00001d021906	1.19583	up	photosystem I light harvesting complex gene 2
Zm00001d009868	1.19588	up	GTP binding Elongation factor Tu family protein
Zm00001d051628	1.19605	up	diacylglycerol acyltransferase family
Zm00001d006833	1.19735	up	NA
Zm00001d039179	1.19862	up	Tetratricopeptide repeat (TPR)-like superfamily protein
Zm00001d013223	1.19886	up	semialdehyde dehydrogenase family protein
Zm00001d013240	1.19936	up	Domain of unknown function (DUF3598)
Zm00001d050938	1.20012	up	Tetratricopeptide repeat (TPR)-like superfamily protein
Zm00001d017121	1.20198	up	glyceraldehyde-3-phosphate dehydrogenase C2
Zm00001d033976	1.20285	up	indoleacetic acid-induced protein 16
Zm00001d039644	1.20485	up	don-glucosyltransferase 1
Zm00001d003227	1.20498	up	Tetratricopeptide repeat (TPR)-like superfamily protein
Zm00001d021844	1.20554	up	TatD related DNase
Zm00001d025043	1.20715	up	#N/A
Zm00001d015999	1.20754	up	proteinaceous RNase P 1
Zm00001d034440	1.20782	up	Ribosomal protein L4/L1 family
Zm00001d009182	1.20862	up	multifunctional protein 2
Zm00001d047930	1.20894	up	#N/A
Zm00001d022237	1.20979	up	chloroplast RNA-binding protein 29
Zm00001d033174	1.21176	up	reversibly glycosylated polypeptide 2
Zm00001d002421	1.21296	up	Tetratricopeptide repeat (TPR)-like superfamily protein
Zm00001d046460	1.21342	up	indole-3-acetate beta-D-glucosyltransferase
Zm00001d037725	1.21343	up	Mitochondrial substrate carrier family protein
Zm00001d013940	1.2145	up	Noc2p family
Zm00001d040116	1.21595	up	temperature sensing protein-related
Zm00001d017551	1.21729	up	#N/A
Zm00001d038784	1.21865	up	phytochrome-associated protein 1
Zm00001d028399	1.21883	up	Pathogenesis-related thaumatin superfamily protein
Zm00001d025996	1.21919	up	Ubiquitin carboxyl-terminal hydrolase family protein
Zm00001d049741	1.2204	up	Concanavalin A-like lectin protein kinase family protein
Zm00001d026517	1.22221	up	NA
Zm00001d046898	1.22232	up	dihydrodipicolinate synthase 1
Zm00001d019200	1.22248	up	#N/A
Zm00001d002326	1.22396	up	Pyridoxal phosphate (PLP)-dependent transferases superfamily protein
Zm00001d010149	1.22555	up	#N/A
Zm00001d019052	1.22743	up	FKBP-like peptidyl-prolyl cis-trans isomerase family protein
Zm00001d034256	1.22894	up	Sugar isomerase (SIS) family protein
Zm00001d012518	1.2291	up	Phosphoglycerate mutase, 2,3-bisphosphoglycerate-independent
Zm00001d008591	1.22913	up	Octicosapeptide/Phox/Bem1p family protein
Zm00001d041703	1.23097	up	pre-mRNA splicing factor-related
Zm00001d018555	1.23166	up	homoserine kinase
Zm00001d045261	1.23177	up	Glycogen/starch synthases, ADP-glucose type
Zm00001d005905	1.23186	up	alpha/beta-Hydrolases superfamily protein
Zm00001d028689	1.23296	up	ABC-2 type transporter family protein
Zm00001d017317	1.23383	up	Tetratricopeptide repeat (TPR)-like superfamily protein
Zm00001d008625	1.23478	up	63 kDa inner membrane family protein
Zm00001d038777	1.23516	up	NA
Zm00001d017714	1.2355	up	Major facilitator superfamily protein
Zm00001d024393	1.23685	up	Aldolase-type TIM barrel family protein
Zm00001d014366	1.23701	up	SKU5 similar 5
Zm00001d042125	1.23938	up	#N/A
Zm00001d052591	1.23945	up	AP2/B3-like transcriptional factor family protein
Zm00001d007259	1.24198	up	#N/A
Zm00001d036293	1.24232	up	S-adenosyl-L-methionine-dependent methyltransferases superfamily protein
Zm00001d038807	1.24276	up	periodic tryptophan protein 2
Zm00001d036122	1.24278	up	Glycosyltransferase family 61 protein
Zm00001d011773	1.24428	up	S-adenosyl-L-methionine-dependent methyltransferases superfamily protein
Zm00001d028980	1.24521	up	exostosin family protein
Zm00001d030656	1.24563	up	HCO3- transporter family
Zm00001d047728	1.24619	up	mitogen-activated protein kinase kinase kinase 14
Zm00001d010672	1.24688	up	Phosphoglycerate kinase family protein
Zm00001d048174	1.24799	up	#N/A
Zm00001d043595	1.24865	up	Regulator of chromosome condensation (RCC1) family protein
Zm00001d050082	1.24918	up	pectin methylesterase 44
Zm00001d033977	1.25221	up	Tetratricopeptide repeat (TPR)-like superfamily protein
Zm00001d051504	1.2528	up	purine permease 11
Zm00001d045451	1.25381	up	Transketolase
Zm00001d004025	1.2539	up	DnaJ domain ;Myb-like DNA-binding domain
Zm00001d047340	1.25439	up	allene oxide cyclase 3
Zm00001d044194	1.25488	up	CAPRICE-like MYB3
Zm00001d005356	1.25532	up	embryo defective 3012
Zm00001d028275	1.2578	up	Tetratricopeptide repeat (TPR)-like superfamily protein
Zm00001d009743	1.25796	up	Tetratricopeptide repeat (TPR)-like superfamily protein
Zm00001d017801	1.25951	up	formate dehydrogenase
Zm00001d037327	1.25995	up	B-box type zinc finger protein with CCT domain
Zm00001d018665	1.26126	up	receptor-like protein kinase 2
Zm00001d012418	1.26213	up	ENTH/VHS family protein
Zm00001d034571	1.26418	up	basic region/leucine zipper transcription factor 16
Zm00001d040111	1.2662	up	NA
Zm00001d009146	1.26627	up	S-adenosylmethionine synthetase family protein
Zm00001d005257	1.2677	up	sulfate transporter 4.1
Zm00001d009666	1.2683	up	NAD(P)-binding Rossmann-fold superfamily protein
Zm00001d044310	1.26976	up	#N/A
Zm00001d009010	1.26976	up	plasma-membrane associated cation-binding protein 1
Zm00001d018348	1.27038	up	Plastid-lipid associated protein PAP / fibrillin family protein
Zm00001d051242	1.27641	up	C-terminal domain phosphatase-like 1
Zm00001d050969	1.2767	up	RAB GTPase homolog E1B
Zm00001d016518	1.27814	up	#N/A
Zm00001d005089	1.28046	up	Ribosomal protein L10 family protein
Zm00001d028225	1.28098	up	Pentatricopeptide repeat (PPR-like) superfamily protein
Zm00001d018500	1.28252	up	ABC transporter family protein
Zm00001d020610	1.2834	up	NA
Zm00001d029286	1.28355	up	Putative endonuclease or glycosyl hydrolase
Zm00001d038765	1.28423	up	UDP-glucosyl transferase 88A1
Zm00001d005506	1.28672	up	NA
Zm00001d034409	1.28719	up	hydroxyproline-rich glycoprotein family protein
Zm00001d006115	1.28761	up	Eukaryotic protein of unknown function (DUF914)
Zm00001d023017	1.28776	up	#N/A
Zm00001d013254	1.28906	up	transporter associated with antigen processing protein 2
Zm00001d028238	1.28924	up	CCAAT-binding factor
Zm00001d002863	1.28937	up	#N/A
Zm00001d003655	1.29113	up	RNA helicase family protein
Zm00001d040109	1.29148	up	NA
Zm00001d000316	1.29267	up	NADP-malic enzyme 4
Zm00001d004075	1.29303	up	purple acid phosphatase 27
Zm00001d044457	1.29315	up	Pentatricopeptide repeat (PPR) superfamily protein
Zm00001d016696	1.29595	up	alpha/beta-Hydrolases superfamily protein
Zm00001d030588	1.2961	up	NA
Zm00001d050148	1.29672	up	Leucine-rich repeat protein kinase family protein
Zm00001d050403	1.29907	up	light-harvesting chlorophyll-protein complex I subunit A4
Zm00001d002937	1.30057	up	#N/A
Zm00001d016755	1.30079	up	sequence-specific DNA binding transcription factors
Zm00001d028988	1.30146	up	aminophospholipid ATPase 1
Zm00001d046716	1.30279	up	RNA-binding (RRM/RBD/RNP motifs) family protein
Zm00001d033136	1.30436	up	photosystem II light harvesting complex gene 2.1
Zm00001d013057	1.30445	up	Protein of unknown function (DUF569)
Zm00001d010535	1.30447	up	DHBP synthase RibB-like alpha/beta domain;GTP cyclohydrolase II
Zm00001d032306	1.30515	up	NA
Zm00001d025036	1.30581	up	Uridine diphosphate glycosyltransferase 74E2
Zm00001d033308	1.30636	up	#N/A
Zm00001d011692	1.3065	up	Homeodomain-like/winged-helix DNA-binding family protein
Zm00001d007157	1.30716	up	Pollen Ole e 1 allergen and extensin family protein
Zm00001d044866	1.30862	up	phosphotyrosyl phosphatase activator (PTPA) family protein
Zm00001d053781	1.3091	up	VQ motif-containing protein
Zm00001d043981	1.31091	up	PNAS-3 related
Zm00001d044469	1.31232	up	RNA-binding (RRM/RBD/RNP motifs) family protein
Zm00001d045304	1.31277	up	HXXXD-type acyl-transferase family protein
Zm00001d032669	1.31285	up	glutaredoxin-related
Zm00001d036831	1.31485	up	RING domain ligase2
Zm00001d008651	1.31548	up	pyruvate decarboxylase-2
Zm00001d006360	1.3172	up	expansin-like A1
Zm00001d043166	1.3183	up	UDP-Glycosyltransferase superfamily protein
Zm00001d023210	1.31852	up	cytochrome P450, family 87, subfamily A, polypeptide 9
Zm00001d029758	1.31938	up	Calcium-dependent protein kinase family protein
Zm00001d052967	1.31943	up	NA
Zm00001d002698	1.32199	up	Subtilase family protein
Zm00001d020337	1.3224	up	UDP-Glycosyltransferase superfamily protein
Zm00001d041989	1.32245	up	Zn-dependent exopeptidases superfamily protein
Zm00001d015385	1.32257	up	photosystem I light harvesting complex gene 1
Zm00001d007264	1.32334	up	Protein phosphatase 2C family protein
Zm00001d022560	1.32647	up	lon protease 1
Zm00001d034969	1.32832	up	#N/A
Zm00001d040110	1.32987	up	NA
Zm00001d039731	1.33043	up	TBP-associated factor 4
Zm00001d037849	1.33086	up	cinnamate-4-hydroxylase
Zm00001d011515	1.33227	up	RAD-like 6
Zm00001d009952	1.33289	up	Leucine-rich repeat (LRR) family protein
Zm00001d012897	1.33423	up	Clathrin, heavy chain
Zm00001d027461	1.33581	up	Basic-leucine zipper (bZIP) transcription factor family protein
Zm00001d044986	1.33682	up	NA
Zm00001d014781	1.33687	up	NA
Zm00001d025129	1.33724	up	NAD(P)-binding Rossmann-fold superfamily protein
Zm00001d041298	1.33748	up	Leucine-rich repeat protein kinase family protein
Zm00001d038579	1.33749	up	Phosphoglycerate kinase family protein
Zm00001d048246	1.33811	up	cold regulated gene 27
Zm00001d012327	1.33827	up	#N/A
Zm00001d048358	1.33854	up	aconitase 3
Zm00001d007973	1.33856	up	fucosyltransferase 8
Zm00001d023511	1.33952	up	S-locus lectin protein kinase family protein
Zm00001d023560	1.34437	up	calcium-dependent protein kinase 4
Zm00001d015703	1.34522	up	Apoptosis inhibitory protein 5 (API5)
Zm00001d027816	1.34652	up	Protein of unknown function (DUF620)
Zm00001d014168	1.34981	up	3-ketoacyl-CoA synthase 11
Zm00001d006900	1.35064	up	Class-II DAHP synthetase family protein
Zm00001d049359	1.35119	up	O-Glycosyl hydrolases family 17 protein
Zm00001d047917	1.35196	up	ACT domain repeat 8
Zm00001d021698	1.35331	up	cysteine-rich RLK (RECEPTOR-like protein kinase) 10
Zm00001d049854	1.35378	up	#N/A
Zm00001d017138	1.35412	up	basic helix-loop-helix (bHLH) DNA-binding superfamily protein
Zm00001d016707	1.35432	up	SOUL heme-binding family protein
ENSRNA049458874	1.35467	up	#N/A
Zm00001d017962	1.35493	up	RNA-dependent RNA polymerase 1
Zm00001d019246	1.35534	up	NA
Zm00001d032144	1.35698	up	ARIA-interacting double AP2 domain protein
Zm00001d015585	1.35875	up	Mitochondrial transcription termination factor family protein
Zm00001d025343	1.36127	up	purple acid phosphatase 22
Zm00001d033221	1.36598	up	Ubiquitin carboxyl-terminal hydrolase family protein
Zm00001d033741	1.36708	up	#N/A
Zm00001d050557	1.36784	up	chaperone protein dnaJ-related
Zm00001d035789	1.36786	up	Class II aaRS and biotin synthetases superfamily protein
Zm00001d011958	1.36838	up	Glutathione S-transferase family protein
Zm00001d003776	1.36847	up	cell wall invertase 2
Zm00001d005594	1.37018	up	#N/A
Zm00001d004513	1.37093	up	Pseudouridine synthase/archaeosine transglycosylase-like family protein
Zm00001d015229	1.37102	up	SHK1 binding protein 1
Zm00001d028389	1.37233	up	NA
Zm00001d043915	1.37268	up	Homeodomain-like transcriptional regulator
Zm00001d014966	1.37295	up	Tetratricopeptide repeat (TPR)-like superfamily protein
Zm00001d031925	1.37648	up	PLATZ transcription factor family protein
Zm00001d015183	1.3807	up	L-aspartate oxidase
Zm00001d013272	1.38141	up	ferredoxin hydrogenases
Zm00001d031136	1.382	up	O-acetylserine (thiol) lyase (OAS-TL) isoform A1
Zm00001d032900	1.38761	up	glutamine-rich protein 23
Zm00001d048020	1.38953	up	hemoglobin 1
Zm00001d035925	1.38995	up	6-phosphogluconate dehydrogenase family protein
Zm00001d003744	1.39192	up	acyl-CoA oxidase 2
Zm00001d036761	1.39288	up	Ubiquitin system component Cue protein
Zm00001d018234	1.39388	up	Protein of unknown function (DUF3464)
Zm00001d047048	1.39425	up	#N/A
Zm00001d019712	1.39483	up	myb domain protein r1
Zm00001d002996	1.39605	up	#N/A
Zm00001d028419	1.39689	up	cytochrome P450, family 76, subfamily C, polypeptide 1
Zm00001d013896	1.39707	up	Plant protein of unknown function (DUF641)
Zm00001d029093	1.39712	up	Tetratricopeptide repeat (TPR)-like superfamily protein
Zm00001d018873	1.39718	up	Transducin/WD40 repeat-like superfamily protein
Zm00001d033912	1.39857	up	Transducin family protein / WD-40 repeat family protein
Zm00001d045721	1.40216	up	#N/A
Zm00001d017907	1.40641	up	NA
Zm00001d005908	1.40754	up	Leucine-rich receptor-like protein kinase family protein
Zm00001d042842	1.40764	up	alpha-glucan phosphorylase 2
Zm00001d037619	1.40797	up	HXXXD-type acyl-transferase family protein
Zm00001d020731	1.40998	up	NA
Zm00001d017845	1.41169	up	alpha/beta-Hydrolases superfamily protein
Zm00001d005959	1.41416	up	Ubiquitin carboxyl-terminal hydrolase family protein
Zm00001d045862	1.4181	up	UDP-glucosyl transferase 88A1
Zm00001d037905	1.42435	up	#N/A
Zm00001d033775	1.42593	up	purine biosynthesis 4
Zm00001d019989	1.42624	up	#N/A
Zm00001d010802	1.42728	up	UDP-glucosyl transferase 88A1
Zm00001d031730	1.42758	up	#N/A
Zm00001d028705	1.42923	up	Spo11/DNA topoisomerase VI, subunit A protein
Zm00001d037759	1.43187	up	calmodulin-binding family protein
Zm00001d044615	1.43261	up	Ribosomal protein L10 family protein
Zm00001d018255	1.43588	up	nuclear factor Y, subunit A5
Zm00001d035578	1.43682	up	NA
Zm00001d052242	1.43741	up	ATP synthase delta-subunit gene
Zm00001d014778	1.4392	up	ATPase, F1 complex, OSCP/delta subunit protein
ENSRNA049458846	1.44019	up	#N/A
Zm00001d030795	1.44223	up	Plant calmodulin-binding protein-related
Zm00001d020927	1.44256	up	AGC (cAMP-dependent, cGMP-dependent and protein kinase C) kinase family protein
Zm00001d043445	1.44346	up	pyrimidin 4
Zm00001d037029	1.44394	up	NAC (No Apical Meristem) domain transcriptional regulator superfamily protein
Zm00001d021893	1.44677	up	ARM repeat superfamily protein
Zm00001d044419	1.44765	up	gamete-expressed 3
Zm00001d044250	1.45517	up	carbamoyl phosphate synthetase B
Zm00001d048329	1.4575	up	multidrug resistance-associated protein 3
Zm00001d036313	1.45816	up	#N/A
Zm00001d039977	1.45901	up	C2H2 and C2HC zinc fingers superfamily protein
Zm00001d000133	1.46193	up	acetyl-CoA synthetase
Zm00001d009314	1.46449	up	NAD(P)-binding Rossmann-fold superfamily protein
Zm00001d020317	1.46818	up	NA
Zm00001d049545	1.47285	up	brassinosteroid-responsive RING-H2
Zm00001d052603	1.4759	up	#N/A
Zm00001d019249	1.47731	up	Protein of unknown function (DUF3411)
Zm00001d038904	1.4782	up	NA
Zm00001d013918	1.48087	up	Tetratricopeptide repeat (TPR)-like superfamily protein
Zm00001d052137	1.4815	up	Phosphotyrosine protein phosphatases superfamily protein
Zm00001d024702	1.48169	up	tryptophan synthase beta-subunit 1
Zm00001d036912	1.48334	up	Pentatricopeptide repeat (PPR-like) superfamily protein
Zm00001d013222	1.49353	up	Gibberellin-regulated family protein
Zm00001d033132	1.49464	up	photosystem II light harvesting complex gene 2.1
Zm00001d030676	1.49591	up	Major facilitator superfamily protein
Zm00001d016443	1.50046	up	Peroxidase superfamily protein
Zm00001d007188	1.50112	up	ETHYLENE-INSENSITIVE3-like 1
Zm00001d051149	1.50239	up	myb domain protein 15
Zm00001d032500	1.50279	up	methionine aminopeptidase 1A
Zm00001d037529	1.50358	up	Acyl-CoA N-acyltransferase with RING/FYVE/PHD-type zinc finger protein
Zm00001d014996	1.50591	up	phytosulfokin receptor 1
Zm00001d026306	1.50827	up	Leucine-rich repeat transmembrane protein kinase
ENSRNA049461747	1.50926	up	#N/A
Zm00001d010179	1.50928	up	Subtilase family protein
Zm00001d020436	1.51459	up	Pentatricopeptide repeat (PPR) superfamily protein
Zm00001d027488	1.51542	up	glyceraldehyde-3-phosphate dehydrogenase B subunit
Zm00001d013814	1.5159	up	Pentatricopeptide repeat (PPR-like) superfamily protein
Zm00001d050567	1.51702	up	chlorsulfuron/imidazolinone resistant 1
Zm00001d007890	1.51889	up	evolutionarily conserved C-terminal region 2
Zm00001d003675	1.51919	up	nicotinate phosphoribosyltransferase 2
Zm00001d000312	1.53113	up	#N/A
Zm00001d047186	1.53119	up	Ribosomal protein S4
Zm00001d025057	1.53285	up	NAD(P)-linked oxidoreductase superfamily protein
Zm00001d028743	1.53374	up	NA
Zm00001d034933	1.53861	up	#N/A
Zm00001d015709	1.54049	up	#N/A
Zm00001d045788	1.54379	up	UDP-glucosyl transferase 72E1
Zm00001d047938	1.54387	up	Pathogenesis-related thaumatin superfamily protein
Zm00001d048061	1.549	up	#N/A
Zm00001d013997	1.55451	up	cysteine-rich RLK (RECEPTOR-like protein kinase) 2
Zm00001d047737	1.55622	up	Plant protein of unknown function (DUF828)
ENSRNA049475223	1.56323	up	#N/A
Zm00001d025771	1.57083	up	#N/A
Zm00001d006778	1.57593	up	alpha/beta-Hydrolases superfamily protein
Zm00001d013039	1.57686	up	photosystem I subunit D-2
Zm00001d033719	1.57802	up	B-box type zinc finger protein with CCT domain
Zm00001d038645	1.57988	up	GDSL-like Lipase/Acylhydrolase superfamily protein
Zm00001d014987	1.58059	up	#N/A
Zm00001d006063	1.58126	up	Endonuclease/exonuclease/phosphatase family protein
Zm00001d024148	1.58586	up	NDH-dependent cyclic electron flow 1
Zm00001d052804	1.5869	up	myb domain protein 93
Zm00001d003202	1.59139	up	Ribosomal protein L10 family protein
Zm00001d044920	1.59163	up	carboxyesterase 13
Zm00001d051989	1.59352	up	Galactose oxidase/kelch repeat superfamily protein
Zm00001d049277	1.59372	up	NAD(P)-binding Rossmann-fold superfamily protein
Zm00001d032118	1.60511	up	trehalose phosphatase/synthase 11
Zm00001d013076	1.60637	up	Ribosomal protein L4/L1 family
Zm00001d035835	1.60761	up	Integrase-type DNA-binding superfamily protein
Zm00001d048095	1.60991	up	U5 small nuclear ribonucleoprotein helicase
Zm00001d006069	1.61346	up	Oxidoreductase, zinc-binding dehydrogenase family protein
Zm00001d044618	1.62033	up	Major facilitator superfamily protein
Zm00001d018193	1.62216	up	NA
Zm00001d038203	1.62528	up	NA
Zm00001d014763	1.62676	up	FMN-linked oxidoreductases superfamily protein
Zm00001d025035	1.62743	up	receptor-like protein kinase 1
Zm00001d007228	1.62841	up	fatty acid desaturase 8
Zm00001d049059	1.62898	up	alcohol dehydrogenase 1
Zm00001d044458	1.63038	up	Pentatricopeptide repeat (PPR) superfamily protein
Zm00001d041534	1.6342	up	Transmembrane amino acid transporter family protein
Zm00001d032204	1.63434	up	Arabinanase/levansucrase/invertase
Zm00001d040196	1.64203	up	C-8,7 sterol isomerase
Zm00001d013529	1.64362	up	Major facilitator superfamily protein
Zm00001d053156	1.64621	up	O-methyltransferase family protein
Zm00001d034851	1.6539	up	aspartate kinase 1
Zm00001d002941	1.66065	up	EamA-like transporter family protein
Zm00001d031068	1.66113	up	Protein kinase superfamily protein
Zm00001d047039	1.66254	up	nonsense-mediated mRNA decay NMD3 family protein
Zm00001d004361	1.66791	up	multidrug resistance-associated protein 4
Zm00001d048282	1.67087	up	tubulin-tyrosine ligases;tubulin-tyrosine ligases
Zm00001d020752	1.6729	up	serine carboxypeptidase-like 40
Zm00001d052964	1.67549	up	Bax inhibitor-1 family protein
Zm00001d001802	1.67951	up	#N/A
Zm00001d004728	1.68009	up	NA
Zm00001d048451	1.68799	up	Tetratricopeptide repeat (TPR)-like superfamily protein
Zm00001d049267	1.69613	up	acyl carrier protein 4
Zm00001d031426	1.70041	up	Protein kinase superfamily protein
Zm00001d029884	1.70105	up	Integrase-type DNA-binding superfamily protein
Zm00001d014990	1.7065	up	Transducin/WD40 repeat-like superfamily protein
Zm00001d038741	1.70813	up	arabinogalactan protein 31
Zm00001d028307	1.70949	up	WWE protein-protein interaction domain protein family
Zm00001d039132	1.71145	up	#N/A
Zm00001d022474	1.71885	up	Heavy metal transport/detoxification superfamily protein
Zm00001d047799	1.71889	up	heat shock cognate protein 70-1
Zm00001d051001	1.72233	up	glyceraldehyde-3-phosphate dehydrogenase C2
Zm00001d008582	1.72416	up	#N/A
Zm00001d042731	1.72856	up	actin 7
Zm00001d028950	1.73309	up	NA
Zm00001d030267	1.74389	up	NA
Zm00001d035592	1.75946	up	Plant protein of unknown function (DUF247)
Zm00001d002737	1.76027	up	eukaryotic translation initiation factor 3C
Zm00001d024597	1.77522	up	Protein of unknown function, DUF599
Zm00001d047084	1.7861	up	#N/A
Zm00001d020774	1.78704	up	#N/A
Zm00001d015927	1.79052	up	#N/A
Zm00001d043048	1.79388	up	Granulin repeat cysteine protease family protein
Zm00001d051549	1.79955	up	selenium-binding protein 2
Zm00001d026471	1.81553	up	UDP-glucosyl transferase 89B1
Zm00001d023929	1.81621	up	dicarboxylate transporter 1
Zm00001d013231	1.82264	up	cytochrome P450, family 81, subfamily D, polypeptide 5
Zm00001d021654	1.82337	up	NA
Zm00001d017671	1.82557	up	plant U-box 23
Zm00001d009595	1.82725	up	WRKY family transcription factor
Zm00001d031977	1.84576	up	DHHC-type zinc finger family protein
Zm00001d029176	1.8493	up	acyl-CoA oxidase 2
Zm00001d026603	1.84971	up	magnesium-chelatase subunit chlH, chloroplast, putative / Mg-protoporphyrin IX chelatase, putative (CHLH)
Zm00001d051429	1.85113	up	F-box family protein with a domain of unknown function (DUF295)
Zm00001d050039	1.86468	up	vascular related NAC-domain protein 7
Zm00001d009608	1.87118	up	3-ketoacyl-CoA synthase 4
Zm00001d043036	1.88161	up	LOB domain-containing protein 13
Zm00001d005112	1.88273	up	SAC3/GANP/Nin1/mts3/eIF-3 p25 family
ENSRNA049472105	1.88509	up	#N/A
Zm00001d034611	1.89945	up	NA
Zm00001d037515	1.90577	up	NA
Zm00001d051164	1.90649	up	#N/A
Zm00001d005345	1.91213	up	nucleic acid binding;methyltransferases
Zm00001d031421	1.92187	up	Mog1/PsbP/DUF1795-like photosystem II reaction center PsbP family protein
Zm00001d009395	1.9241	up	#N/A
Zm00001d025409	1.93724	up	Integrase-type DNA-binding superfamily protein
Zm00001d008580	1.94185	up	#N/A
Zm00001d000298	1.94226	up	somatic embryogenesis receptor-like kinase 1
Zm00001d020459	1.94366	up	homeobox protein 28
Zm00001d038465	1.94947	up	Major facilitator superfamily protein
Zm00001d045742	1.95521	up	NA
Zm00001d048886	1.95913	up	#N/A
Zm00001d016724	1.96917	up	#N/A
Zm00001d047879	1.97654	up	NA
Zm00001d049505	1.97794	up	phosphorylcholine cytidylyltransferase2
Zm00001d016930	1.98245	up	Endomembrane protein 70 protein family
Zm00001d031518	1.99258	up	#N/A
Zm00001d044396	1.99806	up	photosystem II light harvesting complex gene B1B2
Zm00001d011841	2.00789	up	Calcium-binding EF-hand family protein
Zm00001d025910	2.00853	up	Integrase-type DNA-binding superfamily protein
Zm00001d033347	2.01845	up	LOB domain-containing protein 37
Zm00001d047568	2.02211	up	calmodulin (CAM)-binding protein of 25 kDa
Zm00001d044106	2.03158	up	UDP-glucosyl transferase 73B5
Zm00001d005309	2.03541	up	#N/A
Zm00001d011748	2.05304	up	K-box region and MADS-box transcription factor family protein
Zm00001d002993	2.058	up	PsbQ-like 3
Zm00001d032185	2.07373	up	Pentatricopeptide repeat (PPR) superfamily protein
Zm00001d045838	2.07842	up	Concanavalin A-like lectin protein kinase family protein
Zm00001d041376	2.08304	up	Homeodomain-like superfamily protein
Zm00001d041827	2.09033	up	Peroxidase superfamily protein
Zm00001d008578	2.10602	up	WRKY family transcription factor
Zm00001d013153	2.11147	up	Galactose oxidase/kelch repeat superfamily protein
Zm00001d049960	2.11748	up	Calcineurin-like metallo-phosphoesterase superfamily protein
ENSRNA049458448	2.11766	up	#N/A
Zm00001d044107	2.12768	up	myb domain protein 21
Zm00001d039188	2.13204	up	Leucine-rich repeat protein kinase family protein
Zm00001d037251	2.13249	up	NA
Zm00001d024178	2.13305	up	Glycosyl transferase family 2 protein
Zm00001d029585	2.14036	up	late embryogenesis abundant protein-related / LEA protein-related
Zm00001d038185	2.14468	up	Major facilitator superfamily protein
Zm00001d046493	2.1506	up	Plant haem oxygenase (decyclizing) family protein
Zm00001d040755	2.16323	up	exocyst subunit exo70 family protein F1
Zm00001d039929	2.17428	up	#N/A
Zm00001d036947	2.17446	up	Leucine-rich repeat protein kinase family protein
Zm00001d048513	2.19486	up	Copper transport protein family
Zm00001d037397	2.19534	up	Concanavalin A-like lectin protein kinase family protein
Zm00001d048152	2.19635	up	Glycosyl hydrolase family 10 protein
Zm00001d005002	2.21447	up	zinc induced facilitator-like 1
Zm00001d031855	2.22367	up	Glutaredoxin family protein
Zm00001d026067	2.22915	up	cytochrome P450, family 704, subfamily A, polypeptide 2
Zm00001d029917	2.24647	up	#N/A
Zm00001d023341	2.25956	up	RING/U-box superfamily protein
Zm00001d021537	2.26461	up	myb domain protein 67
Zm00001d035067	2.26558	up	S-adenosyl-L-methionine-dependent methyltransferases superfamily protein
Zm00001d028013	2.31086	up	#N/A
Zm00001d015876	2.31349	up	#N/A
Zm00001d016132	2.31351	up	AT-hook motif nuclear-localized protein 22
Zm00001d024789	2.32201	up	HXXXD-type acyl-transferase family protein
Zm00001d022553	2.3281	up	NA
Zm00001d045264	2.35061	up	GDSL-like Lipase/Acylhydrolase superfamily protein
Zm00001d032076	2.35657	up	type one serine/threonine protein phosphatase 3
Zm00001d043590	2.36154	up	arabinogalactan protein 31
Zm00001d042949	2.36914	up	NA
Zm00001d044053	2.39222	up	alpha/beta-Hydrolases superfamily protein
Zm00001d016139	2.39569	up	RING/U-box superfamily protein
Zm00001d048476	2.40721	up	MBOAT (membrane bound O-acyl transferase) family protein
Zm00001d034731	2.41176	up	NAD(P)-binding Rossmann-fold superfamily protein
Zm00001d012594	2.42368	up	NA
Zm00001d007974	2.42797	up	NA
Zm00001d040624	2.44102	up	transcription factor-related
Zm00001d049070	2.47653	up	long chain base2
Zm00001d021059	2.48377	up	Plant stearoyl-acyl-carrier-protein desaturase family protein
Zm00001d002452	2.49827	up	WRKY DNA-binding protein 14
Zm00001d001633	2.51004	up	#N/A
Zm00001d028286	2.53368	up	Protein kinase superfamily protein
Zm00001d006026	2.53596	up	2-oxoglutarate (2OG) and Fe(II)-dependent oxygenase superfamily protein
Zm00001d008960	2.54904	up	Cupredoxin superfamily protein
Zm00001d018855	2.57663	up	alpha/beta-Hydrolases superfamily protein
Zm00001d013422	2.66457	up	S-adenosyl-L-methionine-dependent methyltransferases superfamily protein
Zm00001d048051	2.67178	up	#N/A
Zm00001d022592	2.67944	up	hydroxycinnamoyl-CoA shikimate/quinate hydroxycinnamoyl transferase
Zm00001d028740	2.74809	up	NA
Zm00001d011311	2.75026	up	Tetratricopeptide repeat (TPR)-like superfamily protein
Zm00001d037208	2.775	up	NA
Zm00001d041844	2.80938	up	S-adenosyl-L-methionine-dependent methyltransferases superfamily protein
Zm00001d028326	2.81672	up	#N/A
Zm00001d046292	2.82849	up	Integrase-type DNA-binding superfamily protein
Zm00001d002629	2.86589	up	cytochrome P450, family 87, subfamily A, polypeptide 2
Zm00001d000095	2.87238	up	#N/A
Zm00001d048247	2.93426	up	STRUBBELIG-receptor family 6
Zm00001d018682	2.97357	up	Protein of unknown function, DUF538
Zm00001d018581	2.99363	up	#N/A
Zm00001d011212	3.05446	up	basic helix-loop-helix (bHLH) DNA-binding family protein
Zm00001d037250	3.05997	up	TRICHOME BIREFRINGENCE-LIKE 27
Zm00001d026673	3.06913	up	MAP kinase substrate 1
ENSRNA049470937	3.11642	up	#N/A
Zm00001d017329	3.12621	up	UDP-Glycosyltransferase superfamily protein
Zm00001d050417	3.12999	up	#N/A
Zm00001d005528	3.17802	up	#N/A
Zm00001d017375	3.21486	up	CBS domain-containing protein
Zm00001d051691	3.26423	up	Protein of unknown function (DUF506)
Zm00001d019327	3.26858	up	natural resistance-associated macrophage protein 1
Zm00001d014555	3.34988	up	Leucine-rich receptor-like protein kinase family protein
Zm00001d019265	3.38504	up	UDP-Glycosyltransferase superfamily protein
Zm00001d043611	3.41083	up	myb domain protein 87
Zm00001d008453	3.46112	up	#N/A
Zm00001d046151	3.50073	up	RING/U-box superfamily protein
Zm00001d037008	3.50812	up	FAD-binding Berberine family protein
Zm00001d020721	3.51152	up	fucosyltransferase 1
Zm00001d035888	3.51152	up	Bifunctional inhibitor/lipid-transfer protein/seed storage 2S albumin superfamily protein
Zm00001d031398	3.56745	up	S-locus lectin protein kinase family protein
Zm00001d042779	3.66638	up	#N/A
Zm00001d006936	3.75799	up	Peroxidase superfamily protein
Zm00001d044967	3.83978	up	Eukaryotic aspartyl protease family protein
Zm00001d048576	3.8686	up	#N/A
Zm00001d040247	3.87773	up	expansin A1
Zm00001d048990	3.90477	up	phosphatase 2C5
Zm00001d013769	3.95704	up	NA
Zm00001d027678	3.98982	up	lateral organ boundaries-domain 16
Zm00001d045614	3.99194	up	#N/A
Zm00001d032563	4.07344	up	NA
Zm00001d005055	4.13263	up	myb domain protein 46
Zm00001d014603	4.1753	up	Peroxidase family protein
Zm00001d025388	4.1753	up	S-locus lectin protein kinase family protein
Zm00001d028314	4.34654	up	basic helix-loop-helix (bHLH) DNA-binding superfamily protein
Zm00001d021920	4.34821	up	NA
Zm00001d031947	4.69494	up	NA
Zm00001d010042	4.7509	up	RING/U-box superfamily protein
Zm00001d034195	4.75684	up	calmodulin-like 41
Zm00001d024648	4.76137	up	NA
Zm00001d021219	4.85323	up	UDP-glucosyl transferase 85A2
Zm00001d004671	4.86283	up	#N/A
Zm00001d029613	4.87214	up	#N/A
Zm00001d023781	4.91451	up	pumilio 7
Zm00001d007828	4.9775	up	#N/A
Zm00001d047786	4.9775	up	C2H2 and C2HC zinc fingers superfamily protein
Zm00001d035654	5.05572	up	Pathogenesis-related thaumatin superfamily protein
Zm00001d048865	5.08779	up	cytochrome P450, family 71, subfamily B, polypeptide 14
Zm00001d032881	5.16063	up	#N/A
Zm00001d012413	5.18583	up	#N/A
Zm00001d037360	5.18583	up	basic leucine-zipper 58
Zm00001d051371	5.34874	up	C2H2-like zinc finger protein
Zm00001d025038	5.79468	up	senescence-associated gene 12
Zm00001d032883	5.91089	up	expansin 11
Zm00001d039129	6.17622	up	#N/A
Zm00001d046093	6.46689	up	Glycosyltransferase family 61 protein
Zm00001d053906	6.84425	up	#N/A

## Sheet: Table S5
Table S5 Specially expressed DEGs in RILpur-W22 and RILbro-W22 seedlings under salt-treated
geneID	log2FoldChange	up or down	annotation
Zm00001d005057	-2.35944	down	WRKY DNA-binding protein 70
Zm00001d017799	-2.10829	down	Exonuclease family protein
Zm00001d022204	-2.04509	down	NA
Zm00001d011377	-1.8824	down	Auxin-responsive GH3 family protein
Zm00001d048772	-1.85874	down	Ankyrin repeat family protein
Zm00001d013753	-1.77036	down	cytochrome P450, family 79, subfamily B, polypeptide 2
Zm00001d042593	-1.76861	down	Integrase-type DNA-binding superfamily protein
Zm00001d025847	-1.74476	down	beta glucosidase 46
Zm00001d002482	-1.61064	down	myb domain protein 9
Zm00001d027499	-1.55517	down	benzoyloxyglucosinolate 1
Zm00001d042940	-1.52884	down	Plant protein 1589 of unknown function
Zm00001d024314	-1.51899	down	cinnamyl alcohol dehydrogenase 6
Zm00001d008449	-1.43807	down	NA
Zm00001d024522	-1.43786	down	basic helix-loop-helix (bHLH) DNA-binding superfamily protein
Zm00001d052471	-1.41859	down	strictosidine synthase-like 2
Zm00001d045679	-1.40741	down	#N/A
Zm00001d037680	-1.38572	down	HAD superfamily, subfamily IIIB acid phosphatase
Zm00001d018751	-1.37294	down	amino acid permease 6
Zm00001d023400	-1.36604	down	cytochrome P450, family 94, subfamily C, polypeptide 1
Zm00001d037229	-1.35706	down	Transmembrane amino acid transporter family protein
Zm00001d046210	-1.35565	down	beta glucosidase 11
Zm00001d002447	-1.34241	down	wall associated kinase 5
Zm00001d048621	-1.3093	down	white-brown complex homolog protein 11
Zm00001d012443	-1.29912	down	#N/A
Zm00001d013004	-1.29345	down	Calcium-binding EF-hand family protein
Zm00001d000460	-1.29074	down	#N/A
Zm00001d029349	-1.28649	down	NA
Zm00001d007251	-1.27329	down	Xanthine/uracil permease family protein
Zm00001d048868	-1.25836	down	general regulatory factor 11
Zm00001d046364	-1.25063	down	U-box domain-containing protein kinase family protein
Zm00001d049080	-1.24786	down	mitogen-activated protein kinase kinase kinase 3
Zm00001d048907	-1.23581	down	Mannose-6-phosphate isomerase, type I
Zm00001d049092	-1.22315	down	Protein of unknown function (DUF803)
Zm00001d048680	-1.21732	down	#N/A
Zm00001d035166	-1.20508	down	lysine histidine transporter 1
Zm00001d048979	-1.19598	down	Sucrose-phosphate synthase family protein
Zm00001d039685	-1.18305	down	Raffinose synthase family protein
Zm00001d043276	-1.18138	down	#N/A
Zm00001d048707	-1.1801	down	UDP-Glycosyltransferase superfamily protein
Zm00001d004472	-1.15489	down	Polyketide cyclase/dehydrase and lipid transport superfamily protein
Zm00001d050055	-1.14943	down	NA
Zm00001d048783	-1.1169	down	beta-galactosidase 3
Zm00001d048721	-1.10091	down	alpha/beta-Hydrolases superfamily protein
Zm00001d041752	-1.09552	down	GNOM-like 2
Zm00001d048616	-1.09372	down	#N/A
Zm00001d048732	-1.08926	down	sodium hydrogen exchanger 2
Zm00001d012609	-1.08721	down	receptor kinase 3
Zm00001d048208	-1.08248	down	related to AP2 4
Zm00001d006639	-1.07444	down	NA
Zm00001d028565	-1.074	down	Protein of unknown function (DUF620)
Zm00001d011755	-1.07376	down	Protein of unknown function (DUF1264)
Zm00001d017386	-1.06757	down	Remorin family protein
Zm00001d049201	-1.06669	down	cytochrome P450, family 94, subfamily B, polypeptide 3
Zm00001d009116	-1.06651	down	NA
Zm00001d021761	-1.06642	down	MYB-like 102
Zm00001d040823	-1.06626	down	S-locus lectin protein kinase family protein
Zm00001d053133	-1.06066	down	#N/A
Zm00001d012021	-1.05898	down	NA
Zm00001d027530	-1.05294	down	NAC domain containing protein 36
Zm00001d042932	-1.04908	down	Domain of unknown function (DUF966)
Zm00001d011446	-1.04728	down	NAD(P)-binding Rossmann-fold superfamily protein
Zm00001d048944	-1.04219	down	GTP-binding protein, HflX
Zm00001d032036	-1.03744	down	alpha/beta-Hydrolases superfamily protein
Zm00001d052124	-1.03734	down	Plant protein of unknown function (DUF828)
Zm00001d004102	-1.03305	down	CheY-like two-component responsive regulator family protein
Zm00001d047017	-1.03168	down	Basic helix-loop-helix (bHLH) DNA-binding family protein
Zm00001d038751	-1.03094	down	DNAJ heat shock N-terminal domain-containing protein
Zm00001d034713	-1.02769	down	anthranilate synthase 2
Zm00001d004346	-1.02445	down	#N/A
Zm00001d048693	-1.02357	down	senescence-associated family protein
Zm00001d028282	-1.02274	down	allene oxide synthase
Zm00001d049046	-1.01278	down	Protein kinase superfamily protein
Zm00001d049491	-1.01126	down	Plant protein of unknown function (DUF247)
Zm00001d036542	-1.00443	down	Granulin repeat cysteine protease family protein
Zm00001d008901	-1.00144	down	CBL-interacting protein kinase 20
Zm00001d020910	1.00859	up	NA
Zm00001d028409	1.01053	up	TCP-1/cpn60 chaperonin family protein
Zm00001d048434	1.01528	up	NA
Zm00001d020953	1.01572	up	Auxin efflux carrier family protein
Zm00001d029777	1.02178	up	EXORDIUM like 5
Zm00001d034432	1.03408	up	Bax inhibitor-1 family protein
Zm00001d011208	1.03675	up	ACC oxidase 1
Zm00001d052333	1.05016	up	Hypoxia-responsive family protein
Zm00001d045042	1.05314	up	sucrose synthase 4
Zm00001d007123	1.05486	up	FPF1-like protein 1
Zm00001d040245	1.06261	up	serine-type endopeptidase inhibitors
Zm00001d033233	1.06727	up	Metallo-hydrolase/oxidoreductase superfamily protein
Zm00001d037684	1.06883	up	NA
Zm00001d005687	1.06925	up	trehalose-phosphatase/synthase 9
Zm00001d033906	1.06956	up	endoplasmic reticulum oxidoreductins 1
Zm00001d038144	1.07416	up	#N/A
Zm00001d016950	1.07461	up	NAC domain containing protein 46
Zm00001d034866	1.08249	up	homolog of bacterial PANC
Zm00001d006527	1.08309	up	#N/A
Zm00001d000237	1.08408	up	UDP-glycosyltransferase 73B4
Zm00001d014073	1.08563	up	Ribosomal protein L14p/L23e family protein
Zm00001d018687	1.09456	up	NB-ARC domain-containing disease resistance protein
Zm00001d042022	1.10016	up	Peroxidase superfamily protein
Zm00001d024665	1.10583	up	Pyridoxal phosphate (PLP)-dependent transferases superfamily protein
Zm00001d051573	1.12028	up	homeobox protein 22
Zm00001d011237	1.1272	up	WRKY DNA-binding protein 9
Zm00001d034035	1.13661	up	oligopeptide transporter
Zm00001d051362	1.14195	up	tonoplast intrinsic protein 2;3
Zm00001d023580	1.14361	up	aldehyde dehydrogenase 3H1
Zm00001d014191	1.1495	up	Polynucleotidyl transferase, ribonuclease H-like superfamily protein
Zm00001d019256	1.16121	up	UDP-glucosyl transferase 76C2
Zm00001d025814	1.17583	up	Glycosyltransferase family 29 (sialyltransferase) family protein
Zm00001d039310	1.2263	up	cytochrome P450, family 71, subfamily A, polypeptide 25
Zm00001d004921	1.23624	up	O-methyltransferase family protein
Zm00001d032458	1.24232	up	cytochrome P450, family 87, subfamily A, polypeptide 6
Zm00001d021299	1.24441	up	purple acid phosphatase 29
Zm00001d054010	1.26353	up	NA
Zm00001d052136	1.28182	up	2-oxoglutarate (2OG) and Fe(II)-dependent oxygenase superfamily protein
Zm00001d010137	1.2934	up	Glycosyl hydrolase superfamily protein
Zm00001d042337	1.30312	up	Nucleotide-diphospho-sugar transferase family protein
Zm00001d034439	1.30868	up	Plant Tudor-like RNA-binding protein
Zm00001d021459	1.32413	up	SAUR-like auxin-responsive protein family
Zm00001d037318	1.33903	up	acyl activating enzyme 5
Zm00001d017989	1.36137	up	GDSL-like Lipase/Acylhydrolase superfamily protein
Zm00001d002035	1.37187	up	endonuclease 2
Zm00001d033579	1.39549	up	Protein of unknown function, DUF538
Zm00001d010025	1.41216	up	Serine protease inhibitor, potato inhibitor I-type family protein
Zm00001d037973	1.43771	up	S-locus lectin protein kinase family protein
Zm00001d033853	1.45633	up	Inositol 1,3,4-trisphosphate 5/6-kinase family protein
Zm00001d012258	1.45847	up	NA
Zm00001d053212	1.4686	up	RING/U-box superfamily protein
Zm00001d018709	1.47226	up	NA
Zm00001d015905	1.49892	up	Nodulin MtN3 family protein
Zm00001d033314	1.50162	up	AP2/B3-like transcriptional factor family protein
Zm00001d025251	1.63466	up	NA
Zm00001d033747	1.64941	up	glutamine synthase clone R1
Zm00001d003060	1.6987	up	NA
Zm00001d007765	1.98531	up	NA
Zm00001d050628	2.00006	up	cytochrome P450, family 71, subfamily B, polypeptide 2
Zm00001d021814	2.09048	up	#N/A
Zm00001d013172	2.10765	up	NA
Zm00001d028015	2.23227	up	hydroxyproline-rich glycoprotein family protein
Zm00001d044775	2.51742	up	xyloglucan endotransglucosylase/hydrolase 1
Zm00001d052578	2.90448	up	F-box family protein
Zm00001d045907	3.94171	up	#N/A

## Sheet: Table S6
Table S6 GO analysis of specially expressed DEGs in RILpur-W22 seedlings under non-treated and salt-treated
GO term	Ontology	Description	Number in input list	Enrichment	FDR	up-regulated or down-regulated common DEGs
GO:0071944	C	cell periphery	108	1.73505	1.5e-05	up-regulated
GO:0044699	P	single-organism process	312	1.29673	9.7e-05
GO:0005886	C	plasma membrane	87	1.72867	0.00023
GO:0055114	P	oxidation-reduction process	92	1.61718	0.0081
GO:0044710	P	single-organism metabolic process	170	1.36906	0.01
GO:0016491	F	oxidoreductase activity	80	1.63181	0.018
GO:0005576	C	extracellular region	33	1.97482	0.036
GO:0043596	C	nuclear replication fork	7	6.19245	0.036
GO:0001071	F	nucleic acid binding transcription factor activity	53	2.04438	0.00057	down-regulated
GO:0003700	F	transcription factor activity, sequence-specific DNA binding	53	2.04438	0.00057
GO:0019219	P	regulation of nucleobase-containing compound metabolic process	96	1.62912	0.0012
GO:2001141	P	regulation of RNA biosynthetic process	92	1.64767	0.0012
GO:0006355	P	regulation of transcription, DNA-templated	92	1.66227	0.0012
GO:1903506	P	regulation of nucleic acid-templated transcription	92	1.64767	0.0012
GO:0051252	P	regulation of RNA metabolic process	95	1.65835	0.0012
GO:0031072	F	heat shock protein binding	10	6.33851	0.0024
GO:0010468	P	regulation of gene expression	99	1.54735	0.0052
GO:0018130	P	heterocycle biosynthetic process	108	1.49785	0.0065
GO:0050789	P	regulation of biological process	154	1.3611	0.0087
GO:0006351	P	transcription, DNA-templated	92	1.53732	0.0087
GO:0051171	P	regulation of nitrogen compound metabolic process	96	1.5233	0.0087
GO:2000112	P	regulation of cellular macromolecule biosynthetic process	92	1.52861	0.0092
GO:0097659	P	nucleic acid-templated transcription	92	1.52537	0.0092
GO:0032774	P	RNA biosynthetic process	92	1.51892	0.0099
GO:0010556	P	regulation of macromolecule biosynthetic process	92	1.51359	0.01
GO:0009889	P	regulation of biosynthetic process	92	1.50148	0.011
GO:0009408	P	response to heat	13	3.835	0.011
GO:0031326	P	regulation of cellular biosynthetic process	92	1.50305	0.011
GO:1901362	P	organic cyclic compound biosynthetic process	109	1.43816	0.012
GO:0034654	P	nucleobase-containing compound biosynthetic process	100	1.46076	0.013
GO:0009266	P	response to temperature stimulus	16	3.05073	0.017
GO:0065007	P	biological regulation	172	1.29207	0.02
GO:0006457	P	protein folding	19	2.65237	0.022
GO:0060255	P	regulation of macromolecule metabolic process	105	1.41442	0.023
GO:0051082	F	unfolded protein binding	16	3.05073	0.026
GO:0050794	P	regulation of cellular process	141	1.32511	0.029
GO:0080090	P	regulation of primary metabolic process	101	1.40659	0.034
GO:0019438	P	aromatic compound biosynthetic process	103	1.40035	0.034
GO:0031323	P	regulation of cellular metabolic process	101	1.39172	0.046

## Sheet: Table S7
Table S7 GO analysis of specially expressed DEGs in RILbro-W22 seedlings under non-treated and salt-treated
GO term	Ontology	Description	Number in input list	Enrichment	FDR	up-regulated or down-regulated common DEGs
GO:0009579	C	thylakoid	33	3.35443	3.5e-06	up-regulated
GO:0034357	C	photosynthetic membrane	28	3.55352	4e-06
GO:0044436	C	thylakoid part	29	3.55424	4e-06
GO:0031976	C	plastid thylakoid	27	3.61935	4e-06
GO:0009534	C	chloroplast thylakoid	27	3.61935	4e-06
GO:0009507	C	chloroplast	71	2.0143	4.1e-06
GO:0042651	C	thylakoid membrane	26	3.47444	1e-05
GO:0009536	C	plastid	71	1.94982	1e-05
GO:0044434	C	chloroplast part	44	2.39217	1.6e-05
GO:0044435	C	plastid part	44	2.34463	2.4e-05
GO:0055035	C	plastid thylakoid membrane	23	3.5236	2.6e-05
GO:0009535	C	chloroplast thylakoid membrane	23	3.5236	2.6e-05
GO:0043436	P	oxoacid metabolic process	55	2.33361	2.8e-05
GO:0019752	P	carboxylic acid metabolic process	55	2.37831	2.8e-05
GO:0006082	P	organic acid metabolic process	58	2.1748	7.6e-05
GO:0010287	C	plastoglobule	9	7.42431	0.00039
GO:0031984	C	organelle subcompartment	32	2.37898	0.00049
GO:0051186	P	cofactor metabolic process	32	2.71816	0.0007
GO:0009522	C	photosystem I	9	6.65628	0.00073
GO:0032787	P	monocarboxylic acid metabolic process	30	2.77345	0.00083
GO:0044281	P	small molecule metabolic process	78	1.74629	0.0011
GO:0006090	P	pyruvate metabolic process	15	4.46833	0.0011
GO:0006733	P	oxidoreduction coenzyme metabolic process	18	3.80359	0.0011
GO:0046496	P	nicotinamide nucleotide metabolic process	17	3.98488	0.0011
GO:0019362	P	pyridine nucleotide metabolic process	17	3.98488	0.0011
GO:0006732	P	coenzyme metabolic process	25	2.92207	0.0012
GO:0009521	C	photosystem	12	4.39959	0.0014
GO:0072524	P	pyridine-containing compound metabolic process	17	3.83806	0.0015
GO:0009570	C	chloroplast stroma	23	2.617	0.0017
GO:0009532	C	plastid stroma	23	2.55598	0.0023
GO:0030684	C	preribosome	13	3.79352	0.0023
GO:0009523	C	photosystem II	10	4.76622	0.0026
GO:0044711	P	single-organism biosynthetic process	68	1.72599	0.0035
GO:0005737	C	cytoplasm	242	1.22618	0.0041
GO:0009768	P	photosynthesis, light harvesting in photosystem I	7	9.6862	0.0044
GO:0009135	P	purine nucleoside diphosphate metabolic process	12	4.39959	0.006
GO:0006757	P	ATP generation from ADP	12	4.47611	0.006
GO:0006096	P	glycolytic process	12	4.47611	0.006
GO:0046031	P	ADP metabolic process	12	4.47611	0.006
GO:0009179	P	purine ribonucleoside diphosphate metabolic process	12	4.39959	0.006
GO:0006006	P	glucose metabolic process	10	5.362	0.006
GO:0009185	P	ribonucleoside diphosphate metabolic process	12	4.2896	0.0072
GO:1901564	P	organonitrogen compound metabolic process	92	1.51089	0.0092
GO:0006165	P	nucleoside diphosphate phosphorylation	12	4.08533	0.01
GO:0044464	C	cell part	406	1.12237	0.012
GO:0005730	C	nucleolus	19	2.44019	0.012
GO:0016072	P	rRNA metabolic process	20	2.71494	0.013
GO:0009765	P	photosynthesis, light harvesting	7	6.98307	0.015
GO:0015979	P	photosynthesis	17	2.95236	0.015
GO:0044444	C	cytoplasmic part	199	1.23161	0.015
GO:0009132	P	nucleoside diphosphate metabolic process	12	3.81298	0.016
GO:0044724	P	single-organism carbohydrate catabolic process	14	3.33636	0.016
GO:0006091	P	generation of precursor metabolites and energy	32	2.06107	0.017
GO:0005623	C	cell	408	1.11696	0.017
GO:0042254	P	ribosome biogenesis	26	2.25312	0.018
GO:0006364	P	rRNA processing	19	2.62911	0.021
GO:0034470	P	ncRNA processing	24	2.26763	0.027
GO:0022613	P	ribonucleoprotein complex biogenesis	30	2.04591	0.027
GO:0018298	P	protein-chromophore linkage	7	5.88769	0.029
GO:0008152	P	metabolic process	437	1.11567	0.03
GO:0034660	P	ncRNA metabolic process	28	2.07801	0.03
GO:0055086	P	nucleobase-containing small molecule metabolic process	28	2.07801	0.03
GO:0044283	P	small molecule biosynthetic process	31	1.98178	0.03
GO:0044710	P	single-organism metabolic process	153	1.29885	0.03
GO:0044424	C	intracellular part	351	1.12944	0.03
GO:0046939	P	nucleotide phosphorylation	12	3.36439	0.031
GO:0009167	P	purine ribonucleoside monophosphate metabolic process	17	2.59513	0.037
GO:0009416	P	response to light stimulus	18	2.51508	0.037
GO:0009126	P	purine nucleoside monophosphate metabolic process	17	2.59513	0.037
GO:0006807	P	nitrogen compound metabolic process	216	1.22188	0.037
GO:0080044	F	quercetin 7-O-glucosyltransferase activity	10	4.71385	0.037
GO:0080043	F	quercetin 3-O-glucosyltransferase activity	10	4.66261	0.037
GO:0050662	F	coenzyme binding	25	2.37257	0.037
GO:0006520	P	cellular amino acid metabolic process	24	2.15377	0.039
GO:0019693	P	ribose phosphate metabolic process	21	2.29215	0.039
GO:0009451	P	RNA modification	23	2.17315	0.043
GO:1901566	P	organonitrogen compound biosynthetic process	67	1.51026	0.043
GO:1901360	P	organic cyclic compound metabolic process	181	1.24806	0.043
GO:0005622	C	intracellular	355	1.12194	0.043
GO:0009161	P	ribonucleoside monophosphate metabolic process	17	2.50595	0.046
GO:0044237	P	cellular metabolic process	361	1.13413	0.046
GO:0030686	C	90S preribosome	6	4.76622	0.046
GO:1901605	P	alpha-amino acid metabolic process	17	2.48885	0.047
GO:0015630	C	microtubule cytoskeleton	12	2.97168	0.0011	down-regulated
GO:0044430	C	cytoskeletal part	13	2.61633	0.002
GO:0005856	C	cytoskeleton	14	2.46539	0.0023
GO:0032993	C	protein-DNA complex	9	3.22351	0.0026
GO:0005774	C	vacuolar membrane	14	2.41837	0.0028
GO:0000325	C	plant-type vacuole	6	4.42296	0.0031
GO:0000786	C	nucleosome	7	3.72916	0.0036
GO:0044437	C	vacuolar part	14	2.33563	0.0037
GO:0005634	C	nucleus	109	1.27776	0.0038
GO:0009705	C	plant-type vacuole membrane	5	5.11256	0.0039
GO:0044815	C	DNA packaging complex	7	3.49426	0.0051
GO:0005681	C	spliceosomal complex	8	3.09248	0.0056
GO:0006334	P	nucleosome assembly	6	6.23565	0.00061
GO:0031497	P	chromatin assembly	6	6.13508	0.00066
GO:0006333	P	chromatin assembly or disassembly	6	5.76325	0.00089
GO:0050794	P	regulation of cellular process	105	1.33371	0.0012
GO:0033043	P	regulation of organelle organization	12	2.93726	0.0012
GO:0034728	P	nucleosome organization	6	5.35739	0.0013
GO:0050789	P	regulation of biological process	110	1.31403	0.0014
GO:0005216	F	ion channel activity	8	3.84217	0.0016
GO:0016667	F	oxidoreductase activity, acting on a sulfur group of donors	8	3.29329	0.0039
GO:0015036	F	disulfide oxidoreductase activity	7	3.49426	0.0051
GO:0003677	F	DNA binding	64	1.38617	0.0054
GO:0022838	F	substrate-specific channel activity	8	3.07374	0.0058
GO:0001071	F	nucleic acid binding transcription factor activity	31	1.61618	0.0073
GO:0003700	F	transcription factor activity, sequence-specific DNA binding	31	1.61618	0.0073
GO:0019901	F	protein kinase binding	6	3.58844	0.0082
GO:0019900	F	kinase binding	6	3.52199	0.0089
GO:0015267	F	channel activity	8	2.80202	0.0097
GO:0022803	F	passive transmembrane transporter activity	8	2.80202	0.0097
GO:0022836	F	gated channel activity	6	3.4268	0.01
GO:0000307	C	cyclin-dependent protein kinase holoenzyme complex	5	3.64344	0.014
GO:0051128	P	regulation of cellular component organization	13	2.56743	0.0024
GO:0006323	P	DNA packaging	6	4.52827	0.0028
GO:0007088	P	regulation of mitotic nuclear division	6	4.475	0.003
GO:0032774	P	RNA biosynthetic process	63	1.40582	0.0043
GO:0006351	P	transcription, DNA-templated	62	1.40026	0.005
GO:0006355	P	regulation of transcription, DNA-templated	58	1.41639	0.0052
GO:0080090	P	regulation of primary metabolic process	72	1.35525	0.0054
GO:0019219	P	regulation of nucleobase-containing compound metabolic process	61	1.39911	0.0054
GO:0051783	P	regulation of nuclear division	6	3.92139	0.0055
GO:0030001	P	metal ion transport	13	2.30853	0.0056
GO:0097659	P	nucleic acid-templated transcription	62	1.38937	0.0059
GO:0008283	P	cell proliferation	6	3.84217	0.006
GO:0022402	P	cell cycle process	16	2.0743	0.006
GO:2001141	P	regulation of RNA biosynthetic process	58	1.40395	0.0062
GO:1903506	P	regulation of nucleic acid-templated transcription	58	1.40395	0.0062
GO:0045787	P	positive regulation of cell cycle	6	3.76609	0.0066
GO:0051252	P	regulation of RNA metabolic process	59	1.39202	0.0069
GO:0008284	P	positive regulation of cell proliferation	5	4.40249	0.007
GO:0016538	F	cyclin-dependent protein serine/threonine kinase regulator activity	5	3.81902	0.012
GO:0008092	F	cytoskeletal protein binding	12	2.10734	0.014
GO:0015035	F	protein disulfide oxidoreductase activity	6	3.14359	0.015
GO:2000112	P	regulation of cellular macromolecule biosynthetic process	61	1.36987	0.0083
GO:0098588	C	bounding membrane of organelle	21	1.63151	0.022
GO:0005874	C	microtubule	8	2.38106	0.023
GO:0030532	C	small nuclear ribonucleoprotein complex	5	3.20181	0.023
GO:0097525	C	spliceosomal snRNP complex	5	3.20181	0.023
GO:0000398	P	mRNA splicing, via spliceosome	10	2.46676	0.0093
GO:0051171	P	regulation of nitrogen compound metabolic process	63	1.35113	0.0097
GO:0031323	P	regulation of cellular metabolic process	71	1.3223	0.0098
GO:0010556	P	regulation of macromolecule biosynthetic process	61	1.35642	0.01
GO:0022891	F	substrate-specific transmembrane transporter activity	27	1.54764	0.019
GO:0032403	F	protein complex binding	7	2.67332	0.019
GO:0060255	P	regulation of macromolecule metabolic process	72	1.31088	0.011
GO:0000226	P	microtubule cytoskeleton organization	7	2.91954	0.012
GO:0048589	P	developmental growth	5	3.8656	0.012
GO:0009889	P	regulation of biosynthetic process	61	1.34556	0.012
GO:0031326	P	regulation of cellular biosynthetic process	61	1.34697	0.012
GO:0000375	P	RNA splicing, via transesterification reactions	10	2.33073	0.013
GO:0042127	P	regulation of cell proliferation	5	3.72916	0.013
GO:0000377	P	RNA splicing, via transesterification reactions with bulged adenosine as nucleophile	10	2.33073	0.013
GO:0048285	P	organelle fission	11	2.22797	0.013
GO:0099512	C	supramolecular fiber	8	2.25407	0.03
GO:0099513	C	polymeric cytoskeletal fiber	8	2.25407	0.03
GO:1902554	C	serine/threonine protein kinase complex	5	2.85567	0.035
GO:1902911	C	protein kinase complex	5	2.85567	0.035
GO:0010393	P	galacturonan metabolic process	6	3.01885	0.017
GO:1901362	P	organic cyclic compound biosynthetic process	72	1.28397	0.017
GO:0045488	P	pectin metabolic process	6	3.01885	0.017
GO:0006811	P	ion transport	25	1.59446	0.017
GO:0034654	P	nucleobase-containing compound biosynthetic process	66	1.30306	0.017
GO:0048518	P	positive regulation of biological process	24	1.61005	0.018
GO:0065007	P	biological regulation	118	1.19806	0.018
GO:1904029	P	regulation of cyclin-dependent protein kinase activity	5	3.37212	0.019
GO:0000079	P	regulation of cyclin-dependent protein serine/threonine kinase activity	5	3.37212	0.019
GO:0061695	C	transferase complex, transferring phosphorus-containing groups	10	1.93871	0.039
GO:0005887	C	integral component of plasma membrane	7	2.26414	0.04
GO:0019222	P	regulation of metabolic process	72	1.27429	0.02
GO:0000785	C	chromatin	8	2.06165	0.046
GO:0010564	P	regulation of cell cycle process	7	2.55041	0.023
GO:0018130	P	heterocycle biosynthetic process	68	1.27466	0.024
GO:0019887	F	protein kinase regulator activity	5	3.04787	0.028
GO:0007049	P	cell cycle	18	1.69055	0.024
GO:0019438	P	aromatic compound biosynthetic process	69	1.26792	0.025
GO:0010468	P	regulation of gene expression	61	1.28862	0.026
GO:0008380	P	RNA splicing	10	2.07176	0.027
GO:0000272	P	polysaccharide catabolic process	6	2.71696	0.027
GO:0000280	P	nuclear division	9	2.16122	0.028
GO:0007017	P	microtubule-based process	10	2.03845	0.029
GO:0071900	P	regulation of protein serine/threonine kinase activity	5	2.96242	0.031
GO:0015075	F	ion transmembrane transporter activity	20	1.58489	0.033
GO:0065004	P	protein-DNA complex assembly	6	2.55285	0.034
GO:0007067	P	mitotic nuclear division	6	2.53583	0.035
GO:0008017	F	microtubule binding	8	2.17668	0.035
GO:0050793	P	regulation of developmental process	8	2.16738	0.036
GO:0099600	F	transmembrane receptor activity	8	2.15815	0.037
GO:0007346	P	regulation of mitotic cell cycle	6	2.48611	0.038
GO:0019207	F	kinase regulator activity	5	2.75634	0.04
GO:0046873	F	metal ion transmembrane transporter activity	8	2.12203	0.04
GO:0007010	P	cytoskeleton organization	9	1.98802	0.043
GO:0051239	P	regulation of multicellular organismal process	7	2.20781	0.045
GO:0015631	F	tubulin binding	8	2.04503	0.048
GO:0071824	P	protein-DNA complex subunit organization	6	2.33359	0.049

## Sheet: Table S8
Table S8 GO analysis of specially expressed DEGs in RILpur-W22 and RILbro-W22 seedlings under salt-treated
GO term	Ontology	Description	Number in input list	Enrichment	FDR	up-regulated or down-regulated common DEGs
GO:0032501	P	multicellular organismal process	7	3.82429	0.0023	up-regulated
GO:0044710	P	single-organism metabolic process	18	1.88193	0.0045
GO:0044707	P	single-multicellular organism process	6	3.56557	0.0067
GO:0016491	F	oxidoreductase activity	9	2.3833	0.012
GO:0005975	P	carbohydrate metabolic process	7	2.46211	0.023
GO:0016788	F	hydrolase activity, acting on ester bonds	6	2.59394	0.028
GO:0055114	P	oxidation-reduction process	9	2.05386	0.029
GO:0016757	F	transferase activity, transferring glycosyl groups	5	2.84643	0.031
GO:0044723	P	single-organism carbohydrate metabolic process	5	2.82512	0.032
GO:0044767	P	single-organism developmental process	5	2.78638	0.034
GO:0032502	P	developmental process	5	2.5497	0.046
GO:0007154	P	cell communication	10	3.2919	0.00085	down-regulated
GO:0005886	C	plasma membrane	12	2.80069	0.001
GO:0071944	C	cell periphery	13	2.45314	0.002
GO:0005506	F	iron ion binding	5	5.13961	0.003
GO:0044699	P	single-organism process	31	1.51338	0.0044
GO:0007165	P	signal transduction	8	2.89468	0.0063
GO:0023052	P	signaling	8	2.86432	0.0066
GO:0044700	P	single organism signaling	8	2.86647	0.0066
GO:0004672	F	protein kinase activity	9	2.46525	0.01
GO:0006468	P	protein phosphorylation	9	2.31906	0.015
GO:0022892	F	substrate-specific transporter activity	7	2.57971	0.019
GO:0016773	F	phosphotransferase activity, alcohol group as acceptor	9	2.19931	0.02
GO:0046914	F	transition metal ion binding	7	2.42632	0.025
GO:0022891	F	substrate-specific transmembrane transporter activity	6	2.59304	0.028
GO:0051716	P	cellular response to stimulus	10	1.96701	0.029
GO:0005215	F	transporter activity	8	2.09757	0.036

## Sheet: Table S9
Table S9 Summary of RNA-Seq data
Sample	Raw Reads Number	Low-quality Reads Rate(%)	Raw Q30 Bases Rate(%)	Clean Q30 Bases Rate(%)	Raw GC percent(%)	Clean GC percent(%)
NT-WT-1	49114264	0	94.67	94.65	55.82	55.88
NT-WT-2	49396048	0	94.8	94.77	56.21	56.27
NT-mut-1	45821538	0	95.1	95.08	55.37	55.42
NT-mut-2	46890238	0	94.16	94.12	55.3	55.35
salt-WT-1	49594518	0	94.86	94.82	56.84	56.93
salt-WT-2	48666528	0	94.54	94.47	56.94	57.01
salt-mut-1	46914460	0	94.33	94.31	56.93	56.99
salt-mut-2	47367862	0	94.62	94.57	57.65	57.76

## Sheet: Table S10
Table S10 Primer list for qRT-PCR
Primer Name	Sequence (5' to 3')	Sequence (5' to 3')
GAPDH	CCATCACTGCCACACAGAAAAC	AGGAACACGGAAGGACATACCAG
Zm00001d028486	GGTTCATGTGTTGTGTATGCAT	GCTTCGATCGAACAAAGTAACA
Zm00001d032152	TAACGTCATGTTCGTTCTTGTG	GATAGGTAGGGTGGTAGTTTCG
Zm00001d003559	GTTGGATGTACATGTTGATCCG	TGACATGATTTCACGTGATTCG
Zm00001d042049	AACTTCCTCTGTGACTTGAAGC	CCATCTCCTTCATCTTCTCCAG
Zm00001d014914	CGACGTACGGACATCTAACTAG	TTGATGCTTGGCAGGATTATTG
Zm00001d018181	AAGAAGTACAAGGACTACCAGC	CAACAAATAACACGGTCGGTTA
Zm00001d019669	ATCTATTTGTTGAACAGGGGCC	TTCTTTGGATCCACAGGGTTC
Zm00001d008255	GTAATTAATTCCCGTCGGTTCG	TGTTTGTGGATGTCGTATCTCT
Zm00001d037359	GAGAATTTCCGGGACAGAATCT	TTGATGAGGGTCTCGAAGTAGG
Zm00001d047425	ATGGTGTTCGTGCAGTACTTC	CATACAGGTTGACAAGCACAAA
Zm00001d030079	GGGTCGATGAGTTAATTATGCG	AGACTTCGGGAAACAGTGAG
Zm00001d032239	TAGACACACCCGAAAAACAAAG	GGAATGAATTGTTTTCCTCGCA
Zm00001d006828	AGGAGAGCTAACAGTGTCATTG	CTTGGCTTTCAGTTGGTTCTTC
Zm00001d039637	AATATACTTGCGCCAGTAGTGA	GCTTGTAGTCTAGGGTTAGGTC
Zm00001d013465	TTCAACCCGTCAACTATGGTAG	TCCTTATTGGATATCAGCGCTT
Zm00001d008325	CTTCTCCTCCGTCCACATGTA	TCGAAATCAAATTCAGCGAGAC
Zm00001d024783	CACCATTTCTCGTTCTTGGTTC	CCCAGTCCTACAGATGGAAATC
